# Supplementary material for: An unbiased approach to measure aberrant DNA methylation alterations
Source: Research Square preprint supplement (doi:10.21203/rs.3.rs-6372690/v1), 2025-05-10
Supplement: Supplementary file 1 [file d88c9cc3e4fd266e448cf42c.xlsx]

## Sheet: TableS1_Normal
Table S1. Normal tissue datasets
ID	Database	N:	Tissue type	Type	Publication ID
PCPG	TCGA	3	Adrenal gland	Adjacent-Normal	NA
CHOL	TCGA	9	Bile duct	Adjacent-Normal	NA
GSE52955	GEO	5	Bladder	Normal	28166834
BLCA	TCGA	21	Bladder	Adjacent-Normal	NA
GSE52270	GEO	10	Brain	Normal	26813288
GSE76269	GEO	5	Brain	Normal	28581523
GBMLGG	TCGA	2	Brain	Adjacent-Normal	NA
GSE37754	GEO	10	Breast	Normal	24316975
GSE52270	GEO	19	Breast	Normal	26813288
GSE52865	GEO	17	Breast	Normal	25468711
GSE53051	GEO	10	Breast	Normal	25191524
GSE66313	GEO	15	Breast	Adjacent-Normal	26213588
GSE66695	GEO	40	Breast	Normal	-
GSE67919	GEO	26	Breast	Normal	5953686
GSE88883	GEO	100	Breast	Normal	28693600
BRCA	TCGA	97	Breast	Adjacent-Normal	NA
CESC	TCGA	3	Cervical	Adjacent-Normal	NA
GSE131013	GEO	96	Colon	Adjacent-Normal	32957849
GSE48684	GEO	41	Colon	Normal	24793120
GSE52270	GEO	18	Colon	Normal	26813288
GSE53051	GEO	12	Colon	Normal	25191524
GSE79740	GEO	10	Colon	Normal	28595259
COADREAD	TCGA	45	Colorectal	Adjacent-Normal	NA
ESCA	TCGA	16	Esophageal	Adjacent-Normal	NA
GSE74845	GEO	216	Fallopian	Normal	27216078
GSE81228	GEO	5	Fallopian	Normal	27259716
HNSC	TCGA	50	Head and Neck	Adjacent-Normal	NA
GSE103186	GEO	61	Intestinal	Normal biopsy	29290541
GSE73832	GEO	34	Intestinal	Normal	26169971
GSE126441	GEO	10	Kidney	Nomal	-
GSE52955	GEO	6	Kidney	Normal	28166834
GSE59157	GEO	36	Kidney	Normal	25134821
KIPAN	TCGA	205	Kidney	Adjacent-Normal	NA
GSE112791	GEO	48	Liver	Non-tumorous	30598371
GSE136319	GEO	47	Liver	Non-tumorous	33747361
GSE76269	GEO	10	Liver	Normal	28581523
LIHC	TCGA	50	Liver	Adjacent-Normal	NA
GSE53051	GEO	11	Lung	Normal	25191524
GSE75008	GEO	40	Lung	Normal	27197161
GSE94785	GEO	28	Lung	Normal	28722770
LUAD	TCGA	32	Lung	Adjacent-Normal	NA
LUSC	TCGA	42	Lung	Adjacent-Normal	NA
GSE136704	GEO	17	Oral	Normal	33133131
GSE97784	GEO	12	Oral	Normal	28890207
GSE81228	GEO	5	Ovarian	Normal	27259716
GSE53051	GEO	8	Pancreas	Normal	25191524
PAAD	TCGA	10	Pancreas	Adjacent-Normal	NA
GSE112047	GEO	16	Prostate	Normal	29740534
GSE52955	GEO	5	Prostate	Normal	28166834
GSE76269	GEO	5	Prostate	Normal	28581523
PRAD	TCGA	50	Prostate	Adjacent-Normal	NA
SKCM	TCGA	2	Skin	Adjacent-Normal	NA
SARC	TCGA	4	Soft tissue	Adjacent-Normal	NA
STAD	TCGA	2	Stomach	Adjacent-Normal	NA
GSE74104	GEO	128	Testicular	Normal tissue	27803193
THCA	TCGA	56	Thymus	Adjacent-Normal	NA
GSE53051	GEO	12	Thyroid	Normal	25191524
GSE97466	GEO	50	Thyroid	Adjacent-Normal	28938489
THYM	TCGA	2	Thyroid	Adjacent-Normal	NA
UCEC	TCGA	46	Uterus	Adjacent-Normal	NA

## Sheet: TableS2_Cancer
Table S2. Cancer tissue datasets
Cancer type	Database	N:
ACC	TCGA	80
BLCA	TCGA	412
BRCA	TCGA	783
CESC	TCGA	307
CHOL	TCGA	36
COADREAD	TCGA	393
DLBC	TCGA	48
ESCA	TCGA	185
GBMLGG	TCGA	656
HNSC	TCGA	528
KICH	TCGA	66
KIRC	TCGA	319
KIRP	TCGA	275
LAML	TCGA	194
LIHC	TCGA	377
LUAD	TCGA	458
LUSC	TCGA	370
MESO	TCGA	87
OV	TCGA	10
PAAD	TCGA	184
PCPG	TCGA	179
PRAD	TCGA	498
SARC	TCGA	261
SKCM	TCGA	105
STAD	TCGA	395
TGCT	TCGA	150
THCA	TCGA	503
THYM	TCGA	124
UCEC	TCGA	431
UCS	TCGA	57
UVM	TCGA	80

## Sheet: TableS3_Top_Probes_Hypo
Table S3. Top 10% probes identified in the hypomethylation direction
∆Meth only		Rel ∆Meth only		Overlap
ID	Relation_to_Island	ID	Relation_to_Island	ID	Relation_to_Island
cg00007326	Island	cg00019654	OpenSea	cg00035220	N_Shore
cg00016127	OpenSea	cg00029246	OpenSea	cg00059707	N_Shelf
cg00019366	Island	cg00036110	N_Shelf	cg00073384	OpenSea
cg00020348	OpenSea	cg00036976	OpenSea	cg00160440	S_Shelf
cg00023673	OpenSea	cg00041401	OpenSea	cg00163018	OpenSea
cg00038342	N_Shore	cg00041575	OpenSea	cg00223136	S_Shelf
cg00054741	OpenSea	cg00042882	N_Shore	cg00225603	OpenSea
cg00055881	OpenSea	cg00055986	OpenSea	cg00250645	OpenSea
cg00061678	OpenSea	cg00080252	N_Shore	cg00377087	OpenSea
cg00067588	OpenSea	cg00086488	Island	cg00414041	OpenSea
cg00067742	OpenSea	cg00089384	N_Shore	cg00444390	OpenSea
cg00071241	OpenSea	cg00098799	OpenSea	cg00487989	OpenSea
cg00083993	OpenSea	cg00107982	N_Shelf	cg00511577	OpenSea
cg00094303	OpenSea	cg00110545	S_Shelf	cg00563352	OpenSea
cg00101104	OpenSea	cg00112952	S_Shore	cg00584686	N_Shore
cg00112929	OpenSea	cg00115458	OpenSea	cg00595212	S_Shelf
cg00113321	S_Shelf	cg00127353	OpenSea	cg00602115	OpenSea
cg00118158	OpenSea	cg00159243	OpenSea	cg00611227	OpenSea
cg00145985	OpenSea	cg00163727	OpenSea	cg00627361	OpenSea
cg00146655	OpenSea	cg00164941	S_Shelf	cg00757822	OpenSea
cg00148513	N_Shelf	cg00169897	OpenSea	cg00763743	OpenSea
cg00150560	S_Shore	cg00184457	OpenSea	cg00765992	N_Shelf
cg00157223	S_Shelf	cg00187686	OpenSea	cg00838756	S_Shore
cg00159987	OpenSea	cg00206507	OpenSea	cg00852051	OpenSea
cg00186207	S_Shelf	cg00210856	OpenSea	cg00893368	N_Shore
cg00186580	N_Shore	cg00217080	Island	cg00902374	OpenSea
cg00191903	OpenSea	cg00218409	OpenSea	cg00909062	N_Shore
cg00202568	OpenSea	cg00239657	OpenSea	cg00916635	OpenSea
cg00212119	OpenSea	cg00269817	S_Shore	cg00937286	OpenSea
cg00218770	N_Shore	cg00273543	S_Shelf	cg00966141	N_Shore
cg00219321	OpenSea	cg00275828	OpenSea	cg01015123	OpenSea
cg00235126	N_Shore	cg00276214	Island	cg01116873	OpenSea
cg00238427	N_Shore	cg00282706	OpenSea	cg01149929	OpenSea
cg00243661	OpenSea	cg00294382	OpenSea	cg01210307	OpenSea
cg00253185	OpenSea	cg00306893	OpenSea	cg01226963	Island
cg00263146	S_Shelf	cg00326231	N_Shore	cg01239704	OpenSea
cg00263677	OpenSea	cg00350503	N_Shelf	cg01255513	Island
cg00279755	OpenSea	cg00356694	OpenSea	cg01311955	OpenSea
cg00286513	N_Shore	cg00365692	OpenSea	cg01343097	OpenSea
cg00287713	N_Shore	cg00370106	OpenSea	cg01349088	OpenSea
cg00299737	N_Shore	cg00378950	OpenSea	cg01372939	OpenSea
cg00313297	OpenSea	cg00381745	N_Shore	cg01415919	Island
cg00314343	OpenSea	cg00401433	OpenSea	cg01420001	N_Shore
cg00320539	OpenSea	cg00420997	OpenSea	cg01445411	OpenSea
cg00327669	Island	cg00426668	OpenSea	cg01483139	OpenSea
cg00332882	OpenSea	cg00430542	N_Shore	cg01510696	OpenSea
cg00355799	OpenSea	cg00431968	OpenSea	cg01515155	OpenSea
cg00361025	N_Shore	cg00434119	S_Shore	cg01519261	OpenSea
cg00367962	OpenSea	cg00440032	OpenSea	cg01526748	OpenSea
cg00374101	OpenSea	cg00440531	N_Shore	cg01530024	OpenSea
cg00385194	OpenSea	cg00442907	OpenSea	cg01719405	OpenSea
cg00392505	Island	cg00446900	OpenSea	cg01733284	OpenSea
cg00394221	OpenSea	cg00449000	N_Shore	cg01748263	OpenSea
cg00413543	OpenSea	cg00460589	OpenSea	cg01752041	N_Shore
cg00417710	S_Shore	cg00470341	OpenSea	cg01786382	N_Shore
cg00427986	OpenSea	cg00470505	Island	cg01810186	OpenSea
cg00442924	OpenSea	cg00476617	OpenSea	cg01819142	OpenSea
cg00477226	OpenSea	cg00485050	S_Shelf	cg01839452	OpenSea
cg00479718	OpenSea	cg00485748	S_Shore	cg01939741	N_Shelf
cg00491428	OpenSea	cg00490406	OpenSea	cg01947943	OpenSea
cg00493139	N_Shelf	cg00491523	OpenSea	cg01963754	N_Shore
cg00493358	OpenSea	cg00495693	OpenSea	cg01989203	OpenSea
cg00512658	N_Shelf	cg00497735	OpenSea	cg02109704	N_Shelf
cg00523067	OpenSea	cg00510718	N_Shelf	cg02245566	OpenSea
cg00526273	Island	cg00514971	Island	cg02303068	OpenSea
cg00533835	Island	cg00536910	N_Shore	cg02349416	S_Shore
cg00541956	N_Shelf	cg00541303	OpenSea	cg02350790	OpenSea
cg00564465	N_Shelf	cg00574742	OpenSea	cg02390561	Island
cg00564524	N_Shore	cg00604356	N_Shore	cg02394701	OpenSea
cg00565679	OpenSea	cg00610577	OpenSea	cg02445395	Island
cg00579393	OpenSea	cg00658743	N_Shore	cg02456944	N_Shore
cg00582765	OpenSea	cg00673646	OpenSea	cg02470440	OpenSea
cg00590022	OpenSea	cg00676711	OpenSea	cg02510802	OpenSea
cg00592695	OpenSea	cg00743788	S_Shore	cg02567289	S_Shelf
cg00594228	OpenSea	cg00744494	S_Shore	cg02583228	OpenSea
cg00601124	OpenSea	cg00772863	N_Shore	cg02788731	OpenSea
cg00601648	OpenSea	cg00806644	OpenSea	cg02954324	N_Shelf
cg00614503	OpenSea	cg00808305	OpenSea	cg02987523	OpenSea
cg00618096	OpenSea	cg00828618	OpenSea	cg03002586	OpenSea
cg00623774	N_Shore	cg00834924	OpenSea	cg03150753	OpenSea
cg00628919	Island	cg00868652	OpenSea	cg03151258	N_Shore
cg00633740	S_Shelf	cg00890049	OpenSea	cg03216635	OpenSea
cg00636390	S_Shore	cg00905584	S_Shelf	cg03221366	Island
cg00640456	OpenSea	cg00913032	OpenSea	cg03265969	S_Shelf
cg00647046	N_Shore	cg00922157	S_Shelf	cg03271520	OpenSea
cg00705661	OpenSea	cg00927226	OpenSea	cg03361379	N_Shore
cg00718242	OpenSea	cg00929345	N_Shore	cg03380744	OpenSea
cg00730694	OpenSea	cg00930194	OpenSea	cg03471346	OpenSea
cg00731458	S_Shelf	cg00935216	OpenSea	cg03570232	OpenSea
cg00737846	OpenSea	cg00943851	OpenSea	cg03580872	OpenSea
cg00751958	OpenSea	cg00952516	OpenSea	cg03729553	N_Shelf
cg00785598	N_Shore	cg00957641	OpenSea	cg03736789	OpenSea
cg00789416	OpenSea	cg00969288	OpenSea	cg03749154	N_Shelf
cg00791548	OpenSea	cg00997853	OpenSea	cg03763300	S_Shelf
cg00792723	OpenSea	cg00998124	S_Shore	cg03774288	OpenSea
cg00800109	OpenSea	cg01014190	N_Shore	cg03784083	OpenSea
cg00830325	N_Shore	cg01058360	OpenSea	cg03900492	N_Shore
cg00830435	Island	cg01071185	OpenSea	cg04041976	N_Shelf
cg00844246	S_Shore	cg01077058	OpenSea	cg04221650	OpenSea
cg00867889	OpenSea	cg01125141	S_Shore	cg04314711	Island
cg00894567	OpenSea	cg01136458	S_Shore	cg04414975	OpenSea
cg00914146	S_Shelf	cg01138020	OpenSea	cg04498153	N_Shore
cg00916432	OpenSea	cg01140416	OpenSea	cg04515268	OpenSea
cg00927624	S_Shelf	cg01159194	Island	cg04515667	OpenSea
cg00938547	OpenSea	cg01184282	OpenSea	cg04574507	OpenSea
cg00938877	OpenSea	cg01190484	OpenSea	cg04578894	OpenSea
cg00946316	S_Shore	cg01195276	OpenSea	cg04696181	OpenSea
cg00949578	OpenSea	cg01221209	OpenSea	cg04761824	OpenSea
cg00967316	OpenSea	cg01244342	OpenSea	cg04776357	OpenSea
cg00978051	N_Shelf	cg01255894	N_Shore	cg04781580	OpenSea
cg00981443	OpenSea	cg01263631	OpenSea	cg04812644	OpenSea
cg00992687	OpenSea	cg01270206	N_Shore	cg04842934	OpenSea
cg00996790	S_Shore	cg01270241	OpenSea	cg04892646	N_Shelf
cg01015395	OpenSea	cg01279413	N_Shore	cg04898487	N_Shore
cg01023798	OpenSea	cg01282174	OpenSea	cg04915566	OpenSea
cg01024175	OpenSea	cg01282269	N_Shore	cg04919425	OpenSea
cg01043336	OpenSea	cg01286319	OpenSea	cg04923174	OpenSea
cg01047028	OpenSea	cg01288184	OpenSea	cg04928338	N_Shelf
cg01055386	S_Shore	cg01295994	N_Shore	cg04958165	S_Shelf
cg01057527	N_Shore	cg01301803	N_Shore	cg05042938	OpenSea
cg01061980	OpenSea	cg01395254	OpenSea	cg05126581	OpenSea
cg01074659	OpenSea	cg01396530	OpenSea	cg05166028	S_Shelf
cg01076387	N_Shelf	cg01399981	N_Shore	cg05249074	N_Shore
cg01078434	OpenSea	cg01408010	OpenSea	cg05252264	OpenSea
cg01078903	OpenSea	cg01421252	OpenSea	cg05296099	S_Shore
cg01079872	OpenSea	cg01423916	OpenSea	cg05343184	N_Shore
cg01080456	OpenSea	cg01425731	OpenSea	cg05353872	OpenSea
cg01084270	OpenSea	cg01448115	OpenSea	cg05472998	OpenSea
cg01089425	OpenSea	cg01464104	OpenSea	cg05500783	OpenSea
cg01119319	OpenSea	cg01471572	OpenSea	cg05506209	OpenSea
cg01129246	OpenSea	cg01492061	OpenSea	cg05513274	OpenSea
cg01129320	N_Shelf	cg01495509	OpenSea	cg05533210	S_Shelf
cg01132056	OpenSea	cg01495831	OpenSea	cg05583676	OpenSea
cg01150411	S_Shelf	cg01498090	OpenSea	cg05650559	OpenSea
cg01155831	N_Shelf	cg01510278	OpenSea	cg05672569	OpenSea
cg01156081	OpenSea	cg01534572	OpenSea	cg05681996	OpenSea
cg01159294	OpenSea	cg01536803	OpenSea	cg05682479	OpenSea
cg01182154	S_Shelf	cg01549227	N_Shore	cg05687660	OpenSea
cg01188466	OpenSea	cg01574513	Island	cg05699035	S_Shelf
cg01193954	OpenSea	cg01577083	OpenSea	cg05784088	OpenSea
cg01202700	N_Shelf	cg01577114	OpenSea	cg05787063	OpenSea
cg01205338	OpenSea	cg01594125	OpenSea	cg05847519	OpenSea
cg01215682	N_Shore	cg01595397	N_Shore	cg05851730	OpenSea
cg01227294	OpenSea	cg01602153	Island	cg05906769	OpenSea
cg01249202	OpenSea	cg01612140	OpenSea	cg05988964	N_Shore
cg01259329	OpenSea	cg01612158	OpenSea	cg06089606	OpenSea
cg01289782	N_Shore	cg01642550	OpenSea	cg06275635	OpenSea
cg01292613	OpenSea	cg01649879	OpenSea	cg06316219	OpenSea
cg01311802	OpenSea	cg01659176	N_Shore	cg06382546	OpenSea
cg01336260	OpenSea	cg01665118	OpenSea	cg06383401	OpenSea
cg01344243	OpenSea	cg01679262	OpenSea	cg06388363	OpenSea
cg01364202	OpenSea	cg01681098	S_Shore	cg06412669	OpenSea
cg01372107	N_Shore	cg01683215	Island	cg06417570	N_Shore
cg01375869	S_Shore	cg01702055	OpenSea	cg06427821	Island
cg01377459	OpenSea	cg01703205	OpenSea	cg06574296	N_Shore
cg01378999	Island	cg01706263	OpenSea	cg06580523	N_Shelf
cg01396102	OpenSea	cg01712948	OpenSea	cg06644655	OpenSea
cg01421943	OpenSea	cg01714284	OpenSea	cg06700166	OpenSea
cg01424997	OpenSea	cg01724456	OpenSea	cg06719334	OpenSea
cg01448544	OpenSea	cg01729116	N_Shelf	cg06760904	OpenSea
cg01457572	N_Shelf	cg01733904	OpenSea	cg06834916	S_Shelf
cg01460124	Island	cg01749725	OpenSea	cg06837778	OpenSea
cg01507200	OpenSea	cg01759114	OpenSea	cg06906435	OpenSea
cg01520122	OpenSea	cg01768686	OpenSea	cg06951647	OpenSea
cg01532589	OpenSea	cg01768814	OpenSea	cg06972389	OpenSea
cg01548777	Island	cg01771065	S_Shore	cg06997767	OpenSea
cg01554970	N_Shelf	cg01777433	N_Shelf	cg07048608	OpenSea
cg01555300	OpenSea	cg01782711	OpenSea	cg07075238	OpenSea
cg01568736	OpenSea	cg01788444	OpenSea	cg07090653	OpenSea
cg01571775	N_Shore	cg01792749	OpenSea	cg07133994	OpenSea
cg01612220	N_Shore	cg01793320	OpenSea	cg07185425	N_Shore
cg01614169	OpenSea	cg01802121	OpenSea	cg07277756	Island
cg01615815	OpenSea	cg01814027	OpenSea	cg07281377	N_Shore
cg01637734	OpenSea	cg01815263	OpenSea	cg07310849	OpenSea
cg01640958	OpenSea	cg01832662	OpenSea	cg07333231	Island
cg01647728	N_Shore	cg01834856	OpenSea	cg07355337	S_Shore
cg01660346	OpenSea	cg01841050	OpenSea	cg07506407	OpenSea
cg01668008	OpenSea	cg01847754	OpenSea	cg07548313	OpenSea
cg01671881	OpenSea	cg01862311	S_Shore	cg07568233	OpenSea
cg01673418	N_Shore	cg01862897	OpenSea	cg07572317	S_Shore
cg01680054	OpenSea	cg01875106	OpenSea	cg07581226	OpenSea
cg01687217	N_Shore	cg01878435	OpenSea	cg07594472	OpenSea
cg01701303	OpenSea	cg01879506	OpenSea	cg07622833	OpenSea
cg01703246	N_Shelf	cg01890568	OpenSea	cg07623037	OpenSea
cg01718785	N_Shelf	cg01897944	OpenSea	cg07657658	OpenSea
cg01726295	OpenSea	cg01904145	N_Shelf	cg07699351	Island
cg01750200	OpenSea	cg01916237	S_Shore	cg07712198	OpenSea
cg01755009	OpenSea	cg01932691	OpenSea	cg07791987	OpenSea
cg01759112	OpenSea	cg01937212	OpenSea	cg07804408	OpenSea
cg01765882	OpenSea	cg01951963	OpenSea	cg07810282	Island
cg01774019	OpenSea	cg01952913	Island	cg07874983	N_Shelf
cg01800445	OpenSea	cg01955492	OpenSea	cg07877987	OpenSea
cg01801610	OpenSea	cg01958189	OpenSea	cg07886472	S_Shore
cg01804281	N_Shelf	cg01965462	N_Shore	cg07902387	OpenSea
cg01804944	OpenSea	cg01966277	OpenSea	cg07909128	OpenSea
cg01815536	OpenSea	cg01967642	N_Shore	cg07949720	OpenSea
cg01857186	OpenSea	cg01980311	N_Shore	cg08009265	OpenSea
cg01860396	OpenSea	cg01981960	OpenSea	cg08015388	OpenSea
cg01886303	Island	cg01987353	OpenSea	cg08188069	OpenSea
cg01891782	OpenSea	cg01995815	OpenSea	cg08279693	OpenSea
cg01903241	OpenSea	cg02017450	OpenSea	cg08387538	OpenSea
cg01907426	OpenSea	cg02031638	N_Shore	cg08479752	OpenSea
cg01907457	N_Shore	cg02048922	S_Shore	cg08546107	OpenSea
cg01914181	S_Shore	cg02052265	OpenSea	cg08550523	OpenSea
cg01935731	OpenSea	cg02057755	OpenSea	cg08621196	N_Shelf
cg01958372	N_Shore	cg02061229	OpenSea	cg08624093	OpenSea
cg01963147	OpenSea	cg02064267	OpenSea	cg08716584	OpenSea
cg01975957	OpenSea	cg02072834	OpenSea	cg08725319	OpenSea
cg01977448	OpenSea	cg02078164	S_Shore	cg08786003	OpenSea
cg01990257	OpenSea	cg02079122	OpenSea	cg08822417	OpenSea
cg01997456	OpenSea	cg02088237	OpenSea	cg08856842	N_Shelf
cg01999622	Island	cg02090654	OpenSea	cg08892613	OpenSea
cg02023215	OpenSea	cg02101876	OpenSea	cg08905487	OpenSea
cg02054964	OpenSea	cg02107844	OpenSea	cg08956101	OpenSea
cg02064848	OpenSea	cg02113214	OpenSea	cg08957001	S_Shore
cg02076848	N_Shore	cg02148654	S_Shore	cg09050058	OpenSea
cg02077084	OpenSea	cg02154084	OpenSea	cg09107594	OpenSea
cg02078083	N_Shore	cg02185007	OpenSea	cg09149672	OpenSea
cg02086166	OpenSea	cg02192678	Island	cg09170112	OpenSea
cg02097144	OpenSea	cg02198625	OpenSea	cg09210956	OpenSea
cg02124291	OpenSea	cg02202664	OpenSea	cg09261793	N_Shelf
cg02128489	OpenSea	cg02202923	S_Shore	cg09261794	OpenSea
cg02134889	OpenSea	cg02205443	S_Shore	cg09291131	OpenSea
cg02140020	OpenSea	cg02222791	OpenSea	cg09301800	OpenSea
cg02144518	OpenSea	cg02225720	N_Shelf	cg09302922	S_Shelf
cg02181080	OpenSea	cg02237906	S_Shore	cg09323898	OpenSea
cg02204428	S_Shelf	cg02245918	OpenSea	cg09383172	OpenSea
cg02214470	OpenSea	cg02246928	OpenSea	cg09417355	OpenSea
cg02217063	OpenSea	cg02252421	OpenSea	cg09452568	OpenSea
cg02273779	OpenSea	cg02276807	Island	cg09461999	S_Shelf
cg02292533	OpenSea	cg02283204	S_Shelf	cg09641248	OpenSea
cg02303399	OpenSea	cg02286081	OpenSea	cg09642857	S_Shelf
cg02306654	N_Shelf	cg02291365	N_Shelf	cg09763347	OpenSea
cg02322365	OpenSea	cg02297936	Island	cg09780768	S_Shelf
cg02323550	Island	cg02300652	OpenSea	cg09891226	S_Shore
cg02332293	OpenSea	cg02331808	OpenSea	cg09923978	OpenSea
cg02333588	S_Shore	cg02347573	N_Shore	cg10061374	OpenSea
cg02340223	N_Shelf	cg02347881	OpenSea	cg10094691	N_Shelf
cg02355183	OpenSea	cg02362246	OpenSea	cg10103000	OpenSea
cg02361493	OpenSea	cg02362859	OpenSea	cg10119001	OpenSea
cg02362508	S_Shelf	cg02366100	OpenSea	cg10133170	OpenSea
cg02367828	N_Shelf	cg02367160	OpenSea	cg10193711	OpenSea
cg02369113	OpenSea	cg02371376	OpenSea	cg10200451	OpenSea
cg02369766	N_Shore	cg02381385	OpenSea	cg10231116	S_Shore
cg02371401	N_Shore	cg02421734	OpenSea	cg10314052	S_Shelf
cg02391549	OpenSea	cg02458516	OpenSea	cg10357555	OpenSea
cg02397179	OpenSea	cg02468320	OpenSea	cg10419957	OpenSea
cg02400308	OpenSea	cg02485729	OpenSea	cg10500702	OpenSea
cg02403239	Island	cg02502358	S_Shore	cg10534479	OpenSea
cg02408311	OpenSea	cg02511845	N_Shelf	cg10660965	OpenSea
cg02431964	OpenSea	cg02565878	OpenSea	cg10689409	OpenSea
cg02436141	OpenSea	cg02565999	OpenSea	cg10729854	OpenSea
cg02444226	OpenSea	cg02578087	OpenSea	cg10754659	OpenSea
cg02448805	N_Shelf	cg02582218	OpenSea	cg10791884	OpenSea
cg02461341	N_Shore	cg02583620	S_Shelf	cg10796634	OpenSea
cg02478172	OpenSea	cg02590287	OpenSea	cg10839745	S_Shelf
cg02478708	OpenSea	cg02598079	N_Shelf	cg10860802	OpenSea
cg02481848	OpenSea	cg02609279	S_Shelf	cg10961733	OpenSea
cg02482438	OpenSea	cg02611419	S_Shore	cg10999347	OpenSea
cg02489094	OpenSea	cg02633068	Island	cg11119340	OpenSea
cg02490589	OpenSea	cg02635726	OpenSea	cg11141696	S_Shelf
cg02495250	OpenSea	cg02641517	OpenSea	cg11243283	OpenSea
cg02495552	S_Shelf	cg02666257	OpenSea	cg11300568	S_Shelf
cg02507677	N_Shelf	cg02691506	OpenSea	cg11311032	OpenSea
cg02515354	OpenSea	cg02693870	N_Shore	cg11348188	OpenSea
cg02521771	OpenSea	cg02698900	Island	cg11515095	N_Shelf
cg02523824	OpenSea	cg02705918	OpenSea	cg11580212	OpenSea
cg02528400	OpenSea	cg02711163	OpenSea	cg11596090	OpenSea
cg02544903	S_Shelf	cg02716776	N_Shore	cg11666098	OpenSea
cg02576892	S_Shelf	cg02737458	OpenSea	cg11734845	OpenSea
cg02577240	OpenSea	cg02738156	OpenSea	cg11744631	OpenSea
cg02582587	OpenSea	cg02772121	OpenSea	cg11888982	OpenSea
cg02584802	S_Shelf	cg02778609	N_Shore	cg12040210	OpenSea
cg02587392	S_Shelf	cg02822108	OpenSea	cg12055258	OpenSea
cg02587435	OpenSea	cg02847766	OpenSea	cg12056696	OpenSea
cg02592239	OpenSea	cg02849956	N_Shore	cg12130725	OpenSea
cg02598319	OpenSea	cg02852025	S_Shelf	cg12163365	OpenSea
cg02598618	OpenSea	cg02855850	OpenSea	cg12176463	OpenSea
cg02600859	S_Shore	cg02861926	OpenSea	cg12204395	OpenSea
cg02601618	OpenSea	cg02883668	N_Shore	cg12389490	OpenSea
cg02608452	N_Shelf	cg02888048	OpenSea	cg12402831	OpenSea
cg02642841	OpenSea	cg02920600	OpenSea	cg12424598	OpenSea
cg02663909	S_Shore	cg02921623	N_Shelf	cg12485572	OpenSea
cg02695116	OpenSea	cg02927252	S_Shore	cg12512771	OpenSea
cg02700130	OpenSea	cg02927679	S_Shore	cg12584111	OpenSea
cg02701024	OpenSea	cg02930348	S_Shelf	cg12731799	OpenSea
cg02701615	OpenSea	cg02932321	OpenSea	cg12747584	OpenSea
cg02704181	OpenSea	cg02939767	OpenSea	cg12886862	OpenSea
cg02705762	OpenSea	cg02955343	N_Shore	cg12906108	OpenSea
cg02706104	OpenSea	cg02959759	S_Shore	cg12931171	OpenSea
cg02719427	N_Shelf	cg02965895	OpenSea	cg13028819	OpenSea
cg02721947	N_Shore	cg02973961	N_Shore	cg13056990	OpenSea
cg02729822	OpenSea	cg03002688	OpenSea	cg13102133	OpenSea
cg02734955	OpenSea	cg03019219	OpenSea	cg13104257	N_Shore
cg02747412	OpenSea	cg03021296	N_Shore	cg13279700	OpenSea
cg02748047	OpenSea	cg03028061	S_Shore	cg13403271	OpenSea
cg02763290	Island	cg03031009	OpenSea	cg13420273	OpenSea
cg02767827	N_Shore	cg03043417	OpenSea	cg13501616	OpenSea
cg02771577	S_Shelf	cg03044376	N_Shore	cg13608273	OpenSea
cg02795546	S_Shelf	cg03052794	N_Shelf	cg13643764	S_Shelf
cg02802376	N_Shore	cg03062944	N_Shelf	cg13659051	S_Shore
cg02808397	S_Shore	cg03073000	OpenSea	cg13671900	OpenSea
cg02811362	N_Shore	cg03084996	OpenSea	cg13680362	OpenSea
cg02818143	OpenSea	cg03090969	OpenSea	cg13716585	OpenSea
cg02827082	S_Shore	cg03136493	OpenSea	cg13782274	Island
cg02827340	OpenSea	cg03145200	OpenSea	cg13817083	S_Shelf
cg02833180	OpenSea	cg03208902	OpenSea	cg13831106	OpenSea
cg02839950	N_Shore	cg03214217	OpenSea	cg13858974	N_Shelf
cg02846790	OpenSea	cg03225787	OpenSea	cg13909533	OpenSea
cg02889647	OpenSea	cg03226887	OpenSea	cg13909949	OpenSea
cg02890248	N_Shelf	cg03232056	OpenSea	cg13931996	OpenSea
cg02891728	OpenSea	cg03240301	OpenSea	cg14001049	S_Shore
cg02913918	Island	cg03252313	OpenSea	cg14087921	Island
cg02931353	N_Shore	cg03263514	Island	cg14094521	OpenSea
cg02969716	OpenSea	cg03275459	OpenSea	cg14095593	OpenSea
cg02976359	N_Shelf	cg03276000	OpenSea	cg14128411	OpenSea
cg02987368	OpenSea	cg03276883	OpenSea	cg14161589	Island
cg02988117	Island	cg03278514	OpenSea	cg14215310	OpenSea
cg02993944	OpenSea	cg03282968	Island	cg14233855	OpenSea
cg02997497	N_Shelf	cg03292377	OpenSea	cg14234656	N_Shelf
cg03002968	OpenSea	cg03293308	OpenSea	cg14239111	Island
cg03012452	S_Shelf	cg03295542	OpenSea	cg14312323	S_Shore
cg03034934	N_Shore	cg03302259	S_Shore	cg14339410	OpenSea
cg03068446	OpenSea	cg03308120	N_Shelf	cg14464551	OpenSea
cg03091851	N_Shore	cg03314963	OpenSea	cg14478460	S_Shelf
cg03094285	OpenSea	cg03326307	N_Shelf	cg14492599	OpenSea
cg03099988	S_Shore	cg03348161	OpenSea	cg14511782	OpenSea
cg03102663	OpenSea	cg03348792	OpenSea	cg14515517	S_Shelf
cg03104467	OpenSea	cg03349134	S_Shelf	cg14518346	N_Shelf
cg03114253	S_Shelf	cg03349582	OpenSea	cg14551991	OpenSea
cg03129103	S_Shore	cg03380198	OpenSea	cg14556787	OpenSea
cg03129645	OpenSea	cg03384920	OpenSea	cg14557064	OpenSea
cg03145062	OpenSea	cg03400849	OpenSea	cg14584961	OpenSea
cg03148498	OpenSea	cg03421236	OpenSea	cg14594063	OpenSea
cg03150647	N_Shelf	cg03430633	OpenSea	cg14602220	OpenSea
cg03153765	OpenSea	cg03447013	OpenSea	cg14603420	OpenSea
cg03171710	N_Shore	cg03466587	OpenSea	cg14649589	OpenSea
cg03180768	OpenSea	cg03466998	OpenSea	cg14696870	OpenSea
cg03200120	OpenSea	cg03494634	OpenSea	cg14705695	OpenSea
cg03228567	OpenSea	cg03495011	S_Shelf	cg14713137	S_Shelf
cg03238396	OpenSea	cg03498081	OpenSea	cg14715697	Island
cg03251111	OpenSea	cg03505225	OpenSea	cg14734668	OpenSea
cg03274368	OpenSea	cg03517776	N_Shore	cg14766621	OpenSea
cg03286742	OpenSea	cg03517998	OpenSea	cg14814331	OpenSea
cg03290602	OpenSea	cg03518729	OpenSea	cg14817783	S_Shore
cg03295626	S_Shelf	cg03520471	OpenSea	cg14819229	Island
cg03300596	OpenSea	cg03535079	OpenSea	cg14886530	OpenSea
cg03302281	N_Shelf	cg03541338	N_Shore	cg14958969	S_Shore
cg03308704	OpenSea	cg03548857	OpenSea	cg14966325	OpenSea
cg03344782	OpenSea	cg03577157	OpenSea	cg14981819	OpenSea
cg03346271	S_Shore	cg03581311	OpenSea	cg15036529	OpenSea
cg03366312	N_Shelf	cg03585263	Island	cg15127879	OpenSea
cg03376340	OpenSea	cg03604067	S_Shore	cg15147534	OpenSea
cg03394734	OpenSea	cg03616827	OpenSea	cg15204595	N_Shelf
cg03407184	OpenSea	cg03619586	N_Shelf	cg15264162	OpenSea
cg03412967	OpenSea	cg03623568	OpenSea	cg15356966	OpenSea
cg03415638	Island	cg03636930	Island	cg15450224	OpenSea
cg03432085	OpenSea	cg03652336	OpenSea	cg15530916	N_Shore
cg03433362	OpenSea	cg03653573	OpenSea	cg15534052	S_Shelf
cg03436967	OpenSea	cg03653855	OpenSea	cg15536401	OpenSea
cg03438558	OpenSea	cg03658985	OpenSea	cg15549700	N_Shelf
cg03447366	N_Shore	cg03660901	OpenSea	cg15604241	OpenSea
cg03453781	OpenSea	cg03661324	OpenSea	cg15651267	OpenSea
cg03458170	OpenSea	cg03661929	OpenSea	cg15689121	OpenSea
cg03466428	OpenSea	cg03682622	OpenSea	cg15700197	OpenSea
cg03468463	OpenSea	cg03694738	S_Shelf	cg15761405	OpenSea
cg03482851	OpenSea	cg03719155	S_Shore	cg15800907	OpenSea
cg03486181	Island	cg03723001	OpenSea	cg15848890	OpenSea
cg03504446	OpenSea	cg03732056	S_Shore	cg15936861	OpenSea
cg03515587	N_Shore	cg03733207	OpenSea	cg15999188	OpenSea
cg03517837	OpenSea	cg03751829	N_Shore	cg16035036	OpenSea
cg03518799	OpenSea	cg03765041	N_Shore	cg16087679	N_Shelf
cg03525433	OpenSea	cg03770952	OpenSea	cg16095464	OpenSea
cg03528710	OpenSea	cg03775802	OpenSea	cg16104371	N_Shelf
cg03529595	OpenSea	cg03780733	N_Shore	cg16131766	OpenSea
cg03530940	OpenSea	cg03784113	OpenSea	cg16282618	OpenSea
cg03535253	OpenSea	cg03787282	OpenSea	cg16313485	OpenSea
cg03539051	OpenSea	cg03788215	S_Shelf	cg16339286	OpenSea
cg03544379	OpenSea	cg03789606	OpenSea	cg16351410	OpenSea
cg03554394	OpenSea	cg03799024	OpenSea	cg16468388	S_Shore
cg03564455	OpenSea	cg03801183	OpenSea	cg16477662	OpenSea
cg03566682	OpenSea	cg03827118	N_Shore	cg16555504	OpenSea
cg03587117	OpenSea	cg03840259	OpenSea	cg16560389	Island
cg03598313	OpenSea	cg03846107	OpenSea	cg16565901	OpenSea
cg03605066	OpenSea	cg03863143	OpenSea	cg16678111	Island
cg03627350	S_Shore	cg03866192	OpenSea	cg16760223	OpenSea
cg03632782	OpenSea	cg03867429	N_Shore	cg16765600	Island
cg03641640	S_Shore	cg03875678	OpenSea	cg16794961	OpenSea
cg03649574	OpenSea	cg03875819	OpenSea	cg16905004	OpenSea
cg03661570	OpenSea	cg03889013	N_Shore	cg16998656	S_Shelf
cg03664459	OpenSea	cg03895540	OpenSea	cg17033333	OpenSea
cg03691144	Island	cg03920764	OpenSea	cg17080335	OpenSea
cg03706086	OpenSea	cg03926025	N_Shore	cg17139690	N_Shelf
cg03708155	OpenSea	cg03928154	OpenSea	cg17144184	OpenSea
cg03716590	OpenSea	cg03928812	OpenSea	cg17150265	N_Shelf
cg03721387	OpenSea	cg03935060	N_Shore	cg17201135	OpenSea
cg03727240	OpenSea	cg03936135	OpenSea	cg17247026	S_Shelf
cg03770575	OpenSea	cg03943115	OpenSea	cg17261096	OpenSea
cg03773882	OpenSea	cg03953704	OpenSea	cg17313709	OpenSea
cg03774868	OpenSea	cg03973622	OpenSea	cg17387069	OpenSea
cg03780486	OpenSea	cg03988700	OpenSea	cg17399417	N_Shore
cg03790312	OpenSea	cg04003327	N_Shore	cg17400812	OpenSea
cg03797537	S_Shelf	cg04011469	OpenSea	cg17463633	OpenSea
cg03800844	OpenSea	cg04012681	OpenSea	cg17519749	OpenSea
cg03812751	OpenSea	cg04017276	OpenSea	cg17524162	OpenSea
cg03815116	OpenSea	cg04024164	S_Shelf	cg17588038	OpenSea
cg03815683	OpenSea	cg04033390	OpenSea	cg17665357	OpenSea
cg03816029	OpenSea	cg04037970	N_Shore	cg17748769	S_Shelf
cg03835709	OpenSea	cg04041283	OpenSea	cg17799068	OpenSea
cg03849231	OpenSea	cg04046889	OpenSea	cg17840707	OpenSea
cg03852659	OpenSea	cg04062190	N_Shelf	cg17844121	OpenSea
cg03861633	N_Shelf	cg04068578	OpenSea	cg17849530	OpenSea
cg03866836	OpenSea	cg04071644	OpenSea	cg17926756	OpenSea
cg03870792	S_Shelf	cg04090745	OpenSea	cg17958291	OpenSea
cg03884018	OpenSea	cg04097334	OpenSea	cg17996830	S_Shore
cg03891384	OpenSea	cg04098585	OpenSea	cg18064715	N_Shelf
cg03896752	OpenSea	cg04103514	OpenSea	cg18087023	OpenSea
cg03900581	OpenSea	cg04104789	OpenSea	cg18099070	OpenSea
cg03904639	OpenSea	cg04118234	N_Shelf	cg18172829	OpenSea
cg03917613	OpenSea	cg04122815	N_Shore	cg18333220	OpenSea
cg03960908	N_Shelf	cg04126261	Island	cg18385570	OpenSea
cg03966010	N_Shelf	cg04141796	N_Shore	cg18432954	N_Shelf
cg03982609	S_Shore	cg04153130	OpenSea	cg18457737	OpenSea
cg03988957	S_Shore	cg04167833	OpenSea	cg18479322	OpenSea
cg03995061	S_Shelf	cg04177251	OpenSea	cg18686665	Island
cg04001520	OpenSea	cg04177287	OpenSea	cg18699226	OpenSea
cg04006565	OpenSea	cg04178131	OpenSea	cg18730034	OpenSea
cg04011062	OpenSea	cg04188920	OpenSea	cg18744355	OpenSea
cg04013561	OpenSea	cg04189187	N_Shelf	cg18766755	OpenSea
cg04021098	OpenSea	cg04207218	OpenSea	cg18809039	OpenSea
cg04066147	OpenSea	cg04212021	S_Shore	cg18837292	OpenSea
cg04075546	OpenSea	cg04214938	OpenSea	cg18845236	OpenSea
cg04103410	OpenSea	cg04227631	OpenSea	cg18902148	OpenSea
cg04111577	OpenSea	cg04230891	N_Shore	cg18908499	OpenSea
cg04112590	OpenSea	cg04231019	S_Shelf	cg18942757	OpenSea
cg04117404	N_Shore	cg04237608	OpenSea	cg18944653	OpenSea
cg04127606	Island	cg04239078	OpenSea	cg18954719	OpenSea
cg04135960	S_Shore	cg04244970	OpenSea	cg18984165	OpenSea
cg04136699	S_Shore	cg04244985	OpenSea	cg19075377	OpenSea
cg04140834	N_Shelf	cg04304978	OpenSea	cg19076258	OpenSea
cg04146801	OpenSea	cg04308443	N_Shelf	cg19091386	OpenSea
cg04152326	OpenSea	cg04312209	OpenSea	cg19153095	OpenSea
cg04152465	OpenSea	cg04316941	OpenSea	cg19197915	OpenSea
cg04161137	Island	cg04322486	OpenSea	cg19212767	OpenSea
cg04172395	OpenSea	cg04324821	OpenSea	cg19212949	OpenSea
cg04197371	OpenSea	cg04334496	OpenSea	cg19247310	OpenSea
cg04212285	N_Shelf	cg04336859	OpenSea	cg19267163	OpenSea
cg04214710	OpenSea	cg04337358	OpenSea	cg19273756	N_Shelf
cg04231590	OpenSea	cg04349084	OpenSea	cg19281864	OpenSea
cg04239798	OpenSea	cg04351205	OpenSea	cg19304003	OpenSea
cg04245097	N_Shelf	cg04362790	OpenSea	cg19366753	OpenSea
cg04258102	OpenSea	cg04365123	N_Shore	cg19391006	OpenSea
cg04259606	OpenSea	cg04371413	OpenSea	cg19406706	OpenSea
cg04303500	S_Shelf	cg04379703	OpenSea	cg19433694	OpenSea
cg04315200	OpenSea	cg04397137	OpenSea	cg19441992	N_Shelf
cg04339692	OpenSea	cg04418647	OpenSea	cg19483465	S_Shore
cg04358516	N_Shelf	cg04463881	OpenSea	cg19533958	OpenSea
cg04362211	OpenSea	cg04470557	S_Shore	cg19596804	OpenSea
cg04382783	OpenSea	cg04476891	OpenSea	cg19606290	OpenSea
cg04414912	OpenSea	cg04493000	N_Shore	cg19696117	N_Shore
cg04426779	OpenSea	cg04499514	OpenSea	cg19716004	S_Shore
cg04448240	OpenSea	cg04507071	OpenSea	cg19746375	OpenSea
cg04451579	OpenSea	cg04515533	N_Shore	cg19757573	OpenSea
cg04458548	OpenSea	cg04543516	OpenSea	cg19813015	Island
cg04461949	N_Shore	cg04554195	OpenSea	cg19866637	N_Shore
cg04463816	N_Shore	cg04563046	OpenSea	cg19877843	OpenSea
cg04464504	OpenSea	cg04566159	Island	cg19902246	OpenSea
cg04465079	S_Shelf	cg04588710	OpenSea	cg19952821	OpenSea
cg04465730	OpenSea	cg04590790	OpenSea	cg19961228	OpenSea
cg04476531	OpenSea	cg04595505	N_Shore	cg20011075	OpenSea
cg04485482	OpenSea	cg04599946	S_Shelf	cg20064139	S_Shelf
cg04506202	OpenSea	cg04636166	OpenSea	cg20129113	Island
cg04511291	OpenSea	cg04638679	OpenSea	cg20141817	OpenSea
cg04512129	OpenSea	cg04642300	OpenSea	cg20159095	OpenSea
cg04516518	Island	cg04672622	OpenSea	cg20244327	OpenSea
cg04522676	N_Shelf	cg04681489	OpenSea	cg20267897	N_Shore
cg04543510	OpenSea	cg04689582	OpenSea	cg20268857	OpenSea
cg04599298	Island	cg04707013	OpenSea	cg20312687	OpenSea
cg04605940	S_Shelf	cg04715120	OpenSea	cg20429350	OpenSea
cg04607251	OpenSea	cg04717485	N_Shelf	cg20469625	OpenSea
cg04629189	OpenSea	cg04719215	N_Shelf	cg20479688	OpenSea
cg04638205	OpenSea	cg04730443	OpenSea	cg20519944	N_Shore
cg04639421	OpenSea	cg04739648	N_Shore	cg20539474	OpenSea
cg04650977	OpenSea	cg04742334	OpenSea	cg20541752	OpenSea
cg04664169	OpenSea	cg04744713	OpenSea	cg20558091	OpenSea
cg04670922	S_Shore	cg04747619	OpenSea	cg20583060	S_Shore
cg04671082	OpenSea	cg04770088	OpenSea	cg20587464	OpenSea
cg04673666	S_Shelf	cg04777091	OpenSea	cg20671415	OpenSea
cg04674428	OpenSea	cg04786142	OpenSea	cg20707230	Island
cg04674529	OpenSea	cg04804542	N_Shelf	cg20714968	S_Shelf
cg04678868	S_Shore	cg04816803	OpenSea	cg20792895	OpenSea
cg04682087	OpenSea	cg04822621	OpenSea	cg20908131	OpenSea
cg04682911	OpenSea	cg04837438	S_Shore	cg21038932	S_Shore
cg04700361	N_Shelf	cg04846432	OpenSea	cg21163617	N_Shelf
cg04700861	OpenSea	cg04851639	OpenSea	cg21167716	S_Shore
cg04720794	N_Shelf	cg04854282	OpenSea	cg21238440	OpenSea
cg04737845	OpenSea	cg04895001	OpenSea	cg21239227	OpenSea
cg04766043	N_Shelf	cg04911139	OpenSea	cg21249131	OpenSea
cg04768315	S_Shelf	cg04913291	OpenSea	cg21282997	OpenSea
cg04772948	OpenSea	cg04913974	OpenSea	cg21336434	OpenSea
cg04774930	S_Shelf	cg04991639	S_Shore	cg21449256	OpenSea
cg04836442	OpenSea	cg05000761	Island	cg21463368	OpenSea
cg04841358	OpenSea	cg05016746	S_Shore	cg21664522	OpenSea
cg04844231	OpenSea	cg05020685	Island	cg21725878	Island
cg04845332	OpenSea	cg05033369	OpenSea	cg21754343	OpenSea
cg04848570	OpenSea	cg05040348	OpenSea	cg21763482	OpenSea
cg04858536	OpenSea	cg05042749	OpenSea	cg21769702	OpenSea
cg04883966	N_Shelf	cg05067125	OpenSea	cg21783198	S_Shelf
cg04886934	OpenSea	cg05076820	OpenSea	cg21789085	OpenSea
cg04902327	N_Shore	cg05088892	OpenSea	cg21871080	OpenSea
cg04903883	N_Shore	cg05095252	OpenSea	cg22311510	OpenSea
cg04907885	OpenSea	cg05109049	OpenSea	cg22337438	OpenSea
cg04910834	OpenSea	cg05125809	N_Shore	cg22338152	OpenSea
cg04917860	OpenSea	cg05130816	OpenSea	cg22340475	N_Shelf
cg04921533	OpenSea	cg05133853	OpenSea	cg22506490	OpenSea
cg04933601	OpenSea	cg05146852	OpenSea	cg22511877	S_Shore
cg04942832	OpenSea	cg05160563	OpenSea	cg22514112	S_Shore
cg04945216	OpenSea	cg05160879	OpenSea	cg22601108	OpenSea
cg04946506	Island	cg05164634	S_Shelf	cg22702857	N_Shelf
cg04960342	S_Shore	cg05165750	S_Shore	cg22714290	OpenSea
cg04966586	OpenSea	cg05174942	OpenSea	cg22791324	N_Shelf
cg04972930	OpenSea	cg05177629	OpenSea	cg22820233	OpenSea
cg04976245	S_Shore	cg05191919	OpenSea	cg22903457	OpenSea
cg04997124	OpenSea	cg05202804	N_Shore	cg22946562	OpenSea
cg05014568	N_Shore	cg05216542	OpenSea	cg23052776	OpenSea
cg05020535	N_Shore	cg05224770	OpenSea	cg23081534	OpenSea
cg05024715	OpenSea	cg05225684	N_Shore	cg23087707	N_Shore
cg05025071	OpenSea	cg05229965	OpenSea	cg23117647	OpenSea
cg05037544	S_Shore	cg05247821	S_Shore	cg23162201	N_Shelf
cg05040360	OpenSea	cg05263113	OpenSea	cg23171231	OpenSea
cg05048730	OpenSea	cg05304729	OpenSea	cg23207876	OpenSea
cg05049825	OpenSea	cg05316785	N_Shelf	cg23221791	OpenSea
cg05070265	OpenSea	cg05330472	OpenSea	cg23230830	OpenSea
cg05118455	N_Shelf	cg05340269	OpenSea	cg23235971	N_Shore
cg05119931	OpenSea	cg05343159	OpenSea	cg23253309	N_Shelf
cg05131064	N_Shelf	cg05344176	OpenSea	cg23260456	OpenSea
cg05138397	N_Shelf	cg05346256	OpenSea	cg23274984	OpenSea
cg05138768	N_Shelf	cg05353292	OpenSea	cg23338195	OpenSea
cg05142057	OpenSea	cg05356778	OpenSea	cg23363930	OpenSea
cg05143424	OpenSea	cg05360774	OpenSea	cg23430594	N_Shore
cg05155520	OpenSea	cg05381287	OpenSea	cg23445525	OpenSea
cg05164181	OpenSea	cg05389236	OpenSea	cg23609450	OpenSea
cg05165982	OpenSea	cg05405389	OpenSea	cg23643466	OpenSea
cg05168573	OpenSea	cg05445291	OpenSea	cg23710945	OpenSea
cg05180206	OpenSea	cg05462446	OpenSea	cg23900422	OpenSea
cg05203206	N_Shore	cg05472059	S_Shelf	cg23962746	OpenSea
cg05218696	OpenSea	cg05480883	N_Shelf	cg23984446	OpenSea
cg05224804	N_Shore	cg05483505	OpenSea	cg24114708	OpenSea
cg05226959	N_Shelf	cg05493580	OpenSea	cg24115681	S_Shelf
cg05232496	OpenSea	cg05500575	OpenSea	cg24127345	OpenSea
cg05232914	OpenSea	cg05502478	OpenSea	cg24205065	Island
cg05233816	OpenSea	cg05512111	OpenSea	cg24211657	OpenSea
cg05235610	S_Shelf	cg05514299	S_Shelf	cg24254317	OpenSea
cg05241143	N_Shelf	cg05516327	Island	cg24258712	OpenSea
cg05247035	OpenSea	cg05524246	OpenSea	cg24459953	OpenSea
cg05255268	OpenSea	cg05545777	OpenSea	cg24799830	OpenSea
cg05257086	OpenSea	cg05563558	OpenSea	cg24833737	S_Shore
cg05258820	OpenSea	cg05569767	N_Shore	cg24837219	OpenSea
cg05262224	OpenSea	cg05582397	OpenSea	cg24838237	OpenSea
cg05267756	S_Shelf	cg05582719	OpenSea	cg24881910	OpenSea
cg05283685	OpenSea	cg05593336	OpenSea	cg24977670	OpenSea
cg05308556	N_Shore	cg05593707	OpenSea	cg24996491	OpenSea
cg05328939	Island	cg05594873	N_Shore	cg25025181	OpenSea
cg05353571	S_Shore	cg05598678	OpenSea	cg25119415	OpenSea
cg05357527	N_Shelf	cg05623614	OpenSea	cg25267258	OpenSea
cg05362160	N_Shelf	cg05626117	S_Shore	cg25282652	OpenSea
cg05369553	OpenSea	cg05656364	OpenSea	cg25320749	OpenSea
cg05372828	Island	cg05684715	N_Shelf	cg25349643	OpenSea
cg05376362	OpenSea	cg05696969	OpenSea	cg25370753	Island
cg05384663	OpenSea	cg05713242	N_Shore	cg25516542	OpenSea
cg05394840	S_Shore	cg05716270	N_Shore	cg25560924	OpenSea
cg05406749	OpenSea	cg05719818	OpenSea	cg25588792	OpenSea
cg05422174	OpenSea	cg05726661	Island	cg25607161	OpenSea
cg05435315	OpenSea	cg05728019	OpenSea	cg25628429	OpenSea
cg05450193	OpenSea	cg05766896	OpenSea	cg25730098	OpenSea
cg05467568	OpenSea	cg05767404	OpenSea	cg25740250	N_Shelf
cg05481163	OpenSea	cg05772125	OpenSea	cg25903223	OpenSea
cg05486606	OpenSea	cg05775862	OpenSea	cg25913882	OpenSea
cg05487890	S_Shore	cg05777583	OpenSea	cg25932290	N_Shelf
cg05490489	OpenSea	cg05792169	OpenSea	cg26012050	N_Shelf
cg05492975	Island	cg05799811	OpenSea	cg26035689	OpenSea
cg05501407	OpenSea	cg05814654	OpenSea	cg26056277	OpenSea
cg05503824	OpenSea	cg05831188	OpenSea	cg26075742	OpenSea
cg05511778	OpenSea	cg05848579	Island	cg26077099	OpenSea
cg05523057	OpenSea	cg05852395	OpenSea	cg26150142	S_Shelf
cg05532980	N_Shelf	cg05853130	OpenSea	cg26151206	OpenSea
cg05554320	N_Shore	cg05861567	OpenSea	cg26159860	OpenSea
cg05563475	OpenSea	cg05883690	S_Shelf	cg26183708	OpenSea
cg05585513	OpenSea	cg05884053	OpenSea	cg26238975	OpenSea
cg05613718	S_Shelf	cg05905844	OpenSea	cg26259818	OpenSea
cg05615150	S_Shelf	cg05910415	OpenSea	cg26303229	OpenSea
cg05645002	OpenSea	cg05916059	OpenSea	cg26317006	OpenSea
cg05694761	OpenSea	cg05918312	OpenSea	cg26328924	OpenSea
cg05697552	S_Shore	cg05919685	OpenSea	cg26337914	OpenSea
cg05702234	OpenSea	cg05935311	N_Shore	cg26383138	OpenSea
cg05712300	OpenSea	cg05935520	OpenSea	cg26403777	OpenSea
cg05718035	Island	cg05935904	S_Shelf	cg26429674	Island
cg05730676	S_Shore	cg05939560	OpenSea	cg26456274	OpenSea
cg05736424	S_Shelf	cg05970721	Island	cg26472326	OpenSea
cg05761458	Island	cg05979457	OpenSea	cg26479667	OpenSea
cg05763609	OpenSea	cg05979766	S_Shelf	cg26573382	OpenSea
cg05764691	S_Shore	cg06003388	OpenSea	cg26677288	OpenSea
cg05779630	OpenSea	cg06016394	OpenSea	cg26765743	OpenSea
cg05780864	S_Shore	cg06056880	OpenSea	cg26787589	OpenSea
cg05795316	OpenSea	cg06056929	S_Shore	cg26796518	OpenSea
cg05802704	OpenSea	cg06058073	OpenSea	cg26840068	OpenSea
cg05812437	OpenSea	cg06088929	N_Shore	cg26864714	OpenSea
cg05812697	S_Shore	cg06118312	OpenSea	cg26895622	OpenSea
cg05819416	OpenSea	cg06120359	OpenSea	cg26989103	OpenSea
cg05829460	OpenSea	cg06121226	OpenSea	cg27104173	OpenSea
cg05844572	N_Shelf	cg06125461	OpenSea	cg27149471	OpenSea
cg05846044	OpenSea	cg06135425	OpenSea	cg27154418	OpenSea
cg05852523	N_Shore	cg06142351	OpenSea	cg27170427	OpenSea
cg05855068	N_Shelf	cg06174882	S_Shelf	cg27224069	OpenSea
cg05864564	OpenSea	cg06185146	OpenSea	cg27298639	OpenSea
cg05883978	OpenSea	cg06185452	OpenSea	cg27342720	OpenSea
cg05887869	OpenSea	cg06261066	OpenSea	cg27394794	OpenSea
cg05888433	OpenSea	cg06294475	OpenSea	cg27468419	OpenSea
cg05905314	OpenSea	cg06297863	OpenSea	cg27611274	OpenSea
cg05909343	OpenSea	cg06313930	OpenSea	cg27632318	OpenSea
cg05914537	OpenSea	cg06319919	OpenSea
cg05921170	OpenSea	cg06339275	OpenSea
cg05924734	OpenSea	cg06339924	OpenSea
cg05926837	OpenSea	cg06347698	OpenSea
cg05933932	OpenSea	cg06390363	S_Shore
cg05940966	OpenSea	cg06393354	OpenSea
cg05943574	OpenSea	cg06394333	OpenSea
cg05953911	OpenSea	cg06395469	OpenSea
cg05975755	OpenSea	cg06400119	OpenSea
cg05986374	N_Shelf	cg06413087	OpenSea
cg05987961	N_Shore	cg06436185	OpenSea
cg05989248	N_Shelf	cg06452558	N_Shelf
cg05989672	S_Shelf	cg06457736	OpenSea
cg06010711	OpenSea	cg06459104	OpenSea
cg06020182	OpenSea	cg06468626	OpenSea
cg06032977	Island	cg06473276	OpenSea
cg06038944	OpenSea	cg06486409	OpenSea
cg06039318	S_Shelf	cg06486618	Island
cg06045121	N_Shelf	cg06510261	OpenSea
cg06065695	OpenSea	cg06527318	OpenSea
cg06074146	S_Shelf	cg06530558	OpenSea
cg06088575	OpenSea	cg06534853	S_Shore
cg06109624	OpenSea	cg06541222	OpenSea
cg06116757	N_Shore	cg06545761	Island
cg06118245	OpenSea	cg06576557	OpenSea
cg06120979	N_Shore	cg06577876	N_Shore
cg06121507	OpenSea	cg06580966	OpenSea
cg06125080	OpenSea	cg06581978	S_Shelf
cg06144418	OpenSea	cg06612016	S_Shelf
cg06166371	OpenSea	cg06613286	S_Shore
cg06168021	N_Shelf	cg06613765	OpenSea
cg06170065	OpenSea	cg06614284	OpenSea
cg06174962	OpenSea	cg06621027	OpenSea
cg06202492	OpenSea	cg06621060	N_Shore
cg06216103	Island	cg06628109	OpenSea
cg06217072	S_Shelf	cg06635059	OpenSea
cg06221609	OpenSea	cg06661994	N_Shore
cg06222885	OpenSea	cg06677416	OpenSea
cg06238921	OpenSea	cg06679878	OpenSea
cg06240409	OpenSea	cg06692929	N_Shelf
cg06264868	OpenSea	cg06712013	N_Shore
cg06266132	OpenSea	cg06715136	OpenSea
cg06276653	OpenSea	cg06723337	OpenSea
cg06338708	OpenSea	cg06740985	OpenSea
cg06339003	OpenSea	cg06745083	OpenSea
cg06345462	OpenSea	cg06755296	S_Shelf
cg06348423	OpenSea	cg06758255	OpenSea
cg06351337	OpenSea	cg06765475	OpenSea
cg06353345	OpenSea	cg06778183	OpenSea
cg06358322	N_Shore	cg06780726	N_Shore
cg06383233	Island	cg06792975	OpenSea
cg06412320	OpenSea	cg06793796	N_Shelf
cg06432426	OpenSea	cg06793974	Island
cg06434454	OpenSea	cg06800235	OpenSea
cg06434470	OpenSea	cg06820822	OpenSea
cg06447474	N_Shore	cg06821269	OpenSea
cg06482220	OpenSea	cg06822690	OpenSea
cg06494497	OpenSea	cg06833778	OpenSea
cg06502659	N_Shelf	cg06834431	OpenSea
cg06506470	OpenSea	cg06837325	OpenSea
cg06507590	OpenSea	cg06846214	OpenSea
cg06513043	N_Shelf	cg06853894	OpenSea
cg06514727	OpenSea	cg06867863	OpenSea
cg06524192	OpenSea	cg06870470	N_Shelf
cg06541760	OpenSea	cg06873024	OpenSea
cg06557683	OpenSea	cg06879394	OpenSea
cg06565452	OpenSea	cg06881914	OpenSea
cg06627916	OpenSea	cg06884470	N_Shelf
cg06638383	OpenSea	cg06885179	OpenSea
cg06656105	OpenSea	cg06941429	OpenSea
cg06692927	OpenSea	cg06942183	S_Shore
cg06703469	OpenSea	cg06942649	OpenSea
cg06713076	OpenSea	cg06943912	S_Shelf
cg06718080	OpenSea	cg06947286	S_Shelf
cg06744481	OpenSea	cg06956786	OpenSea
cg06748955	OpenSea	cg06968859	OpenSea
cg06749213	OpenSea	cg06999858	OpenSea
cg06753050	OpenSea	cg07000713	OpenSea
cg06753918	OpenSea	cg07006935	OpenSea
cg06754532	OpenSea	cg07011961	OpenSea
cg06781656	S_Shelf	cg07015749	N_Shore
cg06832985	OpenSea	cg07026904	S_Shore
cg06832986	N_Shore	cg07052524	S_Shelf
cg06834689	OpenSea	cg07069342	Island
cg06836544	OpenSea	cg07070466	OpenSea
cg06836656	N_Shore	cg07072643	OpenSea
cg06841902	OpenSea	cg07078958	OpenSea
cg06878637	OpenSea	cg07082447	OpenSea
cg06887897	OpenSea	cg07087130	Island
cg06902828	OpenSea	cg07092029	OpenSea
cg06948658	OpenSea	cg07106169	N_Shelf
cg06955214	OpenSea	cg07136646	N_Shelf
cg06962970	OpenSea	cg07138070	OpenSea
cg06966242	Island	cg07139284	Island
cg06995526	OpenSea	cg07143815	OpenSea
cg06996389	OpenSea	cg07147846	OpenSea
cg07014206	S_Shelf	cg07148968	OpenSea
cg07022289	OpenSea	cg07152925	OpenSea
cg07025157	OpenSea	cg07157107	OpenSea
cg07025505	OpenSea	cg07172334	OpenSea
cg07045873	OpenSea	cg07175433	N_Shelf
cg07053177	Island	cg07179267	OpenSea
cg07054564	S_Shore	cg07184316	OpenSea
cg07088427	S_Shore	cg07230581	OpenSea
cg07092145	OpenSea	cg07235577	OpenSea
cg07092157	OpenSea	cg07248223	OpenSea
cg07100560	OpenSea	cg07250916	S_Shelf
cg07109490	Island	cg07260541	OpenSea
cg07115817	OpenSea	cg07263979	N_Shore
cg07128890	OpenSea	cg07273376	OpenSea
cg07130639	N_Shore	cg07277017	OpenSea
cg07134266	OpenSea	cg07280593	OpenSea
cg07139165	N_Shelf	cg07295362	N_Shelf
cg07151236	S_Shore	cg07301829	OpenSea
cg07159802	OpenSea	cg07306414	OpenSea
cg07163389	OpenSea	cg07313373	OpenSea
cg07164606	OpenSea	cg07318609	OpenSea
cg07164722	OpenSea	cg07322909	OpenSea
cg07168837	N_Shore	cg07339864	OpenSea
cg07172242	N_Shelf	cg07352917	OpenSea
cg07183450	S_Shore	cg07353006	OpenSea
cg07201003	S_Shelf	cg07366506	Island
cg07212761	S_Shelf	cg07368069	OpenSea
cg07246713	S_Shelf	cg07369569	S_Shore
cg07254413	OpenSea	cg07375836	S_Shore
cg07254706	OpenSea	cg07376232	OpenSea
cg07263759	OpenSea	cg07385257	OpenSea
cg07264634	N_Shelf	cg07418387	S_Shelf
cg07276388	OpenSea	cg07428782	OpenSea
cg07292140	OpenSea	cg07429087	OpenSea
cg07297178	OpenSea	cg07429192	OpenSea
cg07299645	OpenSea	cg07442907	OpenSea
cg07306108	OpenSea	cg07450210	OpenSea
cg07325539	OpenSea	cg07453778	S_Shelf
cg07325805	OpenSea	cg07466217	OpenSea
cg07337456	OpenSea	cg07470207	OpenSea
cg07338476	OpenSea	cg07474842	OpenSea
cg07346177	S_Shore	cg07478467	OpenSea
cg07348263	OpenSea	cg07486474	OpenSea
cg07367222	N_Shelf	cg07489413	OpenSea
cg07374823	N_Shore	cg07496621	OpenSea
cg07386868	OpenSea	cg07516148	OpenSea
cg07395806	OpenSea	cg07525077	OpenSea
cg07395941	OpenSea	cg07537821	OpenSea
cg07396194	OpenSea	cg07539443	OpenSea
cg07396904	OpenSea	cg07551060	OpenSea
cg07435966	OpenSea	cg07554357	N_Shore
cg07438452	Island	cg07577799	OpenSea
cg07440958	OpenSea	cg07581070	OpenSea
cg07451946	OpenSea	cg07581462	OpenSea
cg07460524	OpenSea	cg07598464	OpenSea
cg07465609	OpenSea	cg07613153	OpenSea
cg07467745	OpenSea	cg07614747	N_Shore
cg07468037	N_Shelf	cg07615383	OpenSea
cg07471948	OpenSea	cg07631533	OpenSea
cg07496624	OpenSea	cg07644125	S_Shore
cg07502050	OpenSea	cg07644446	OpenSea
cg07526227	N_Shore	cg07648740	S_Shore
cg07557491	N_Shelf	cg07650391	OpenSea
cg07563180	OpenSea	cg07664999	OpenSea
cg07569562	N_Shore	cg07673979	S_Shelf
cg07574158	OpenSea	cg07696099	OpenSea
cg07588006	S_Shelf	cg07723365	N_Shelf
cg07622201	OpenSea	cg07741805	OpenSea
cg07628855	OpenSea	cg07744116	S_Shelf
cg07658681	OpenSea	cg07768107	OpenSea
cg07701837	OpenSea	cg07779423	N_Shore
cg07719674	S_Shelf	cg07781364	OpenSea
cg07722840	Island	cg07804289	OpenSea
cg07725536	OpenSea	cg07805542	S_Shelf
cg07728307	N_Shore	cg07822788	OpenSea
cg07742017	N_Shelf	cg07837085	OpenSea
cg07751325	OpenSea	cg07856521	N_Shore
cg07751770	Island	cg07858728	OpenSea
cg07781678	OpenSea	cg07859753	S_Shelf
cg07782924	N_Shelf	cg07906724	OpenSea
cg07783480	OpenSea	cg07911171	OpenSea
cg07811255	OpenSea	cg07912689	OpenSea
cg07814664	OpenSea	cg07912922	OpenSea
cg07818978	OpenSea	cg07935669	N_Shore
cg07821737	OpenSea	cg07938480	OpenSea
cg07830254	OpenSea	cg07944396	OpenSea
cg07837852	OpenSea	cg07960922	OpenSea
cg07841014	OpenSea	cg07963854	S_Shore
cg07844819	OpenSea	cg07965110	S_Shore
cg07851948	OpenSea	cg07972716	S_Shelf
cg07858905	OpenSea	cg07974627	N_Shelf
cg07887163	OpenSea	cg07990390	Island
cg07891080	Island	cg07994435	N_Shore
cg07894967	OpenSea	cg07998554	OpenSea
cg07914107	N_Shore	cg08003402	OpenSea
cg07931608	OpenSea	cg08031024	OpenSea
cg07941978	N_Shelf	cg08078648	OpenSea
cg07943492	OpenSea	cg08122156	OpenSea
cg07959741	OpenSea	cg08123701	OpenSea
cg07974025	S_Shelf	cg08130179	S_Shore
cg07982896	Island	cg08165339	OpenSea
cg07987796	N_Shore	cg08169778	OpenSea
cg07990582	S_Shelf	cg08200621	OpenSea
cg07994859	OpenSea	cg08206267	S_Shelf
cg08002791	OpenSea	cg08230268	OpenSea
cg08048194	OpenSea	cg08238568	OpenSea
cg08085029	OpenSea	cg08250187	OpenSea
cg08096166	OpenSea	cg08261450	N_Shelf
cg08112273	OpenSea	cg08267250	OpenSea
cg08113851	OpenSea	cg08272572	OpenSea
cg08115297	OpenSea	cg08274011	OpenSea
cg08122114	Island	cg08284593	S_Shore
cg08151051	OpenSea	cg08285289	OpenSea
cg08160063	S_Shore	cg08291907	OpenSea
cg08190545	S_Shelf	cg08292485	OpenSea
cg08231096	OpenSea	cg08296680	Island
cg08234256	OpenSea	cg08297985	OpenSea
cg08237565	N_Shore	cg08324862	OpenSea
cg08242576	OpenSea	cg08337633	OpenSea
cg08244156	OpenSea	cg08344524	OpenSea
cg08246366	S_Shelf	cg08364970	OpenSea
cg08261617	OpenSea	cg08365738	OpenSea
cg08326410	OpenSea	cg08382534	OpenSea
cg08336938	OpenSea	cg08383526	OpenSea
cg08346735	S_Shore	cg08387835	N_Shore
cg08363001	OpenSea	cg08393822	OpenSea
cg08373769	S_Shelf	cg08405587	OpenSea
cg08414888	OpenSea	cg08406698	OpenSea
cg08417719	OpenSea	cg08419873	OpenSea
cg08417857	OpenSea	cg08422793	OpenSea
cg08417991	OpenSea	cg08442052	OpenSea
cg08421080	OpenSea	cg08443563	OpenSea
cg08426891	OpenSea	cg08443845	OpenSea
cg08431709	OpenSea	cg08448931	OpenSea
cg08440418	N_Shelf	cg08452802	OpenSea
cg08448893	OpenSea	cg08453903	OpenSea
cg08453811	OpenSea	cg08454015	OpenSea
cg08453928	OpenSea	cg08456555	OpenSea
cg08456666	N_Shore	cg08460399	S_Shelf
cg08457332	S_Shelf	cg08465307	S_Shelf
cg08457980	OpenSea	cg08468011	OpenSea
cg08458170	OpenSea	cg08470863	OpenSea
cg08478250	OpenSea	cg08485649	S_Shore
cg08486180	OpenSea	cg08500112	OpenSea
cg08491641	OpenSea	cg08505647	OpenSea
cg08518101	OpenSea	cg08519008	OpenSea
cg08518715	OpenSea	cg08527124	OpenSea
cg08528474	OpenSea	cg08531890	OpenSea
cg08541457	OpenSea	cg08538032	OpenSea
cg08541649	OpenSea	cg08542181	OpenSea
cg08542751	OpenSea	cg08568767	OpenSea
cg08546120	OpenSea	cg08578568	OpenSea
cg08556772	OpenSea	cg08584947	OpenSea
cg08563982	OpenSea	cg08586426	OpenSea
cg08565979	N_Shore	cg08587313	OpenSea
cg08572454	OpenSea	cg08610901	OpenSea
cg08586642	OpenSea	cg08614334	S_Shelf
cg08635822	OpenSea	cg08635097	OpenSea
cg08670181	S_Shore	cg08641278	S_Shore
cg08684630	OpenSea	cg08642292	OpenSea
cg08689708	OpenSea	cg08656816	OpenSea
cg08700893	OpenSea	cg08657705	OpenSea
cg08715720	OpenSea	cg08665772	N_Shelf
cg08718251	OpenSea	cg08691328	N_Shelf
cg08725167	OpenSea	cg08697847	OpenSea
cg08753403	OpenSea	cg08729981	N_Shelf
cg08759359	OpenSea	cg08754088	OpenSea
cg08761073	OpenSea	cg08767044	N_Shore
cg08763351	OpenSea	cg08768395	N_Shelf
cg08775211	OpenSea	cg08795149	OpenSea
cg08791395	N_Shore	cg08800461	N_Shelf
cg08804537	Island	cg08800893	OpenSea
cg08815365	OpenSea	cg08806184	N_Shelf
cg08815970	N_Shore	cg08814749	OpenSea
cg08825515	S_Shore	cg08822897	OpenSea
cg08835464	OpenSea	cg08826840	OpenSea
cg08840751	OpenSea	cg08835992	OpenSea
cg08844913	OpenSea	cg08852641	OpenSea
cg08847944	OpenSea	cg08900316	OpenSea
cg08871711	OpenSea	cg08916461	OpenSea
cg08872013	N_Shore	cg08918658	OpenSea
cg08877269	OpenSea	cg08939418	S_Shore
cg08879886	OpenSea	cg08944961	OpenSea
cg08880524	S_Shelf	cg08947151	OpenSea
cg08882612	OpenSea	cg08948808	OpenSea
cg08884410	N_Shore	cg08954776	OpenSea
cg08900158	N_Shore	cg08956138	OpenSea
cg08903619	OpenSea	cg08961547	S_Shore
cg08906009	OpenSea	cg08970655	OpenSea
cg08919372	OpenSea	cg08974244	S_Shore
cg08921491	OpenSea	cg08982961	OpenSea
cg08954025	OpenSea	cg08986840	OpenSea
cg08995327	OpenSea	cg09067459	OpenSea
cg09022852	N_Shelf	cg09071093	N_Shelf
cg09026038	OpenSea	cg09075515	OpenSea
cg09042009	OpenSea	cg09083279	OpenSea
cg09062961	OpenSea	cg09087961	OpenSea
cg09073443	OpenSea	cg09093656	OpenSea
cg09075215	OpenSea	cg09102329	OpenSea
cg09092987	OpenSea	cg09126279	OpenSea
cg09127371	OpenSea	cg09142144	OpenSea
cg09134640	OpenSea	cg09156073	OpenSea
cg09138028	OpenSea	cg09160955	OpenSea
cg09141075	OpenSea	cg09166973	OpenSea
cg09141856	OpenSea	cg09169356	OpenSea
cg09143316	OpenSea	cg09169764	OpenSea
cg09163412	Island	cg09180564	OpenSea
cg09169531	OpenSea	cg09209510	OpenSea
cg09186689	OpenSea	cg09225287	S_Shore
cg09216153	OpenSea	cg09232514	OpenSea
cg09220440	OpenSea	cg09238332	Island
cg09220563	OpenSea	cg09249494	OpenSea
cg09246203	OpenSea	cg09254101	OpenSea
cg09257456	OpenSea	cg09266206	N_Shore
cg09274040	N_Shore	cg09271709	OpenSea
cg09279037	N_Shore	cg09287864	OpenSea
cg09293488	OpenSea	cg09315887	S_Shore
cg09318453	OpenSea	cg09326204	S_Shelf
cg09337427	OpenSea	cg09340276	OpenSea
cg09349723	OpenSea	cg09340639	OpenSea
cg09371084	OpenSea	cg09341020	OpenSea
cg09395703	OpenSea	cg09384035	OpenSea
cg09404689	S_Shelf	cg09437135	OpenSea
cg09431058	OpenSea	cg09439192	OpenSea
cg09433131	OpenSea	cg09473745	S_Shore
cg09446465	Island	cg09476067	N_Shore
cg09450097	OpenSea	cg09478095	S_Shore
cg09453685	OpenSea	cg09515098	N_Shelf
cg09456254	OpenSea	cg09516200	OpenSea
cg09462763	OpenSea	cg09532691	OpenSea
cg09469682	OpenSea	cg09577367	OpenSea
cg09478478	OpenSea	cg09580822	OpenSea
cg09489825	S_Shelf	cg09586743	OpenSea
cg09502177	OpenSea	cg09601514	OpenSea
cg09531376	S_Shelf	cg09602803	Island
cg09538031	OpenSea	cg09611620	OpenSea
cg09541333	OpenSea	cg09615276	OpenSea
cg09554876	OpenSea	cg09650495	N_Shelf
cg09557766	OpenSea	cg09652526	OpenSea
cg09567013	Island	cg09678939	OpenSea
cg09573465	N_Shore	cg09696091	OpenSea
cg09584122	OpenSea	cg09732255	S_Shore
cg09596055	S_Shelf	cg09742465	OpenSea
cg09602751	OpenSea	cg09752271	OpenSea
cg09614629	S_Shelf	cg09761230	N_Shelf
cg09657435	OpenSea	cg09762252	N_Shore
cg09659223	OpenSea	cg09765297	OpenSea
cg09664215	OpenSea	cg09832613	OpenSea
cg09668951	OpenSea	cg09853702	OpenSea
cg09691862	OpenSea	cg09857577	S_Shelf
cg09696486	OpenSea	cg09858767	OpenSea
cg09700512	OpenSea	cg09884146	OpenSea
cg09714424	OpenSea	cg09887955	OpenSea
cg09742643	S_Shore	cg09900436	OpenSea
cg09749844	OpenSea	cg09925747	OpenSea
cg09754842	OpenSea	cg09937039	OpenSea
cg09758462	OpenSea	cg09973986	S_Shelf
cg09759719	OpenSea	cg09975995	OpenSea
cg09790780	OpenSea	cg09981407	OpenSea
cg09796029	OpenSea	cg09981929	Island
cg09812790	OpenSea	cg09984316	S_Shelf
cg09828634	OpenSea	cg09989037	OpenSea
cg09829094	OpenSea	cg09994435	N_Shore
cg09829850	S_Shelf	cg09999700	OpenSea
cg09837243	OpenSea	cg10010103	OpenSea
cg09847584	OpenSea	cg10025586	OpenSea
cg09853063	OpenSea	cg10027639	OpenSea
cg09867656	OpenSea	cg10052782	OpenSea
cg09870721	Island	cg10054641	OpenSea
cg09879107	OpenSea	cg10061129	OpenSea
cg09881253	OpenSea	cg10062193	OpenSea
cg09891468	OpenSea	cg10067723	Island
cg09900489	OpenSea	cg10082515	OpenSea
cg09906066	OpenSea	cg10090568	OpenSea
cg09920072	S_Shore	cg10106388	OpenSea
cg09932955	N_Shelf	cg10142837	OpenSea
cg09966430	OpenSea	cg10144863	OpenSea
cg09966455	S_Shelf	cg10167849	Island
cg09970194	S_Shelf	cg10168086	OpenSea
cg09983285	N_Shelf	cg10172979	OpenSea
cg09992350	OpenSea	cg10177359	OpenSea
cg10004481	OpenSea	cg10180415	OpenSea
cg10015974	OpenSea	cg10183893	OpenSea
cg10024799	OpenSea	cg10191240	OpenSea
cg10035812	OpenSea	cg10222925	N_Shore
cg10041069	OpenSea	cg10225951	Island
cg10042532	OpenSea	cg10254167	OpenSea
cg10054857	OpenSea	cg10255237	OpenSea
cg10090418	OpenSea	cg10274208	OpenSea
cg10092394	S_Shelf	cg10308673	OpenSea
cg10111764	N_Shelf	cg10316357	N_Shelf
cg10135682	OpenSea	cg10317717	Island
cg10143323	OpenSea	cg10327756	OpenSea
cg10143823	OpenSea	cg10340048	OpenSea
cg10148047	N_Shore	cg10343367	OpenSea
cg10178621	OpenSea	cg10351740	OpenSea
cg10191581	OpenSea	cg10365900	OpenSea
cg10215763	OpenSea	cg10384725	OpenSea
cg10221266	N_Shelf	cg10397389	OpenSea
cg10241563	OpenSea	cg10436333	N_Shore
cg10256733	OpenSea	cg10439737	OpenSea
cg10259094	N_Shelf	cg10451565	OpenSea
cg10261641	S_Shelf	cg10466548	OpenSea
cg10279872	OpenSea	cg10471825	OpenSea
cg10281340	OpenSea	cg10486610	OpenSea
cg10284884	S_Shore	cg10503827	N_Shelf
cg10287321	OpenSea	cg10504632	OpenSea
cg10291005	OpenSea	cg10510935	OpenSea
cg10303967	OpenSea	cg10513852	N_Shore
cg10318725	S_Shore	cg10516516	OpenSea
cg10323188	N_Shelf	cg10516886	OpenSea
cg10324810	N_Shelf	cg10517290	S_Shelf
cg10335826	S_Shelf	cg10518264	OpenSea
cg10338848	N_Shelf	cg10523370	OpenSea
cg10385251	N_Shore	cg10528455	OpenSea
cg10393548	OpenSea	cg10567744	OpenSea
cg10400362	Island	cg10574006	OpenSea
cg10405729	OpenSea	cg10575547	OpenSea
cg10406538	S_Shore	cg10623221	S_Shelf
cg10416294	N_Shore	cg10635188	OpenSea
cg10421672	S_Shore	cg10635443	N_Shelf
cg10436737	OpenSea	cg10643982	OpenSea
cg10438921	N_Shelf	cg10647025	OpenSea
cg10451314	OpenSea	cg10677017	OpenSea
cg10453337	OpenSea	cg10681483	OpenSea
cg10480506	OpenSea	cg10706013	N_Shore
cg10486439	OpenSea	cg10714639	S_Shore
cg10502354	N_Shelf	cg10753610	S_Shelf
cg10508193	OpenSea	cg10754505	OpenSea
cg10511390	N_Shelf	cg10765655	N_Shelf
cg10522535	OpenSea	cg10767420	OpenSea
cg10528559	OpenSea	cg10784511	OpenSea
cg10534873	OpenSea	cg10786876	Island
cg10542123	OpenSea	cg10789300	OpenSea
cg10543582	OpenSea	cg10805880	OpenSea
cg10626682	OpenSea	cg10821127	OpenSea
cg10626803	N_Shelf	cg10830616	OpenSea
cg10634728	Island	cg10836431	OpenSea
cg10643236	OpenSea	cg10851739	OpenSea
cg10673707	OpenSea	cg10857729	N_Shelf
cg10687537	S_Shelf	cg10886095	OpenSea
cg10699986	OpenSea	cg10898024	OpenSea
cg10730165	OpenSea	cg10899768	S_Shore
cg10731951	OpenSea	cg10902396	OpenSea
cg10740895	OpenSea	cg10902738	OpenSea
cg10756457	N_Shelf	cg10919344	OpenSea
cg10774716	S_Shelf	cg10925082	OpenSea
cg10787000	Island	cg10932874	S_Shelf
cg10796022	OpenSea	cg10937408	OpenSea
cg10818986	OpenSea	cg10943263	OpenSea
cg10821813	OpenSea	cg10950033	OpenSea
cg10831196	Island	cg10956848	Island
cg10845171	N_Shore	cg10966440	OpenSea
cg10855945	S_Shelf	cg10968944	OpenSea
cg10856894	OpenSea	cg10970143	N_Shelf
cg10859449	OpenSea	cg10975290	S_Shelf
cg10859930	N_Shelf	cg10981439	OpenSea
cg10861722	OpenSea	cg10996224	OpenSea
cg10877979	N_Shelf	cg11009736	OpenSea
cg10893667	OpenSea	cg11010561	OpenSea
cg10949632	OpenSea	cg11023224	OpenSea
cg10964330	S_Shelf	cg11032623	OpenSea
cg10965117	Island	cg11038054	OpenSea
cg10976626	OpenSea	cg11052535	OpenSea
cg10977280	OpenSea	cg11069071	OpenSea
cg10979216	OpenSea	cg11087049	N_Shore
cg10982683	OpenSea	cg11093142	OpenSea
cg10994263	OpenSea	cg11127249	OpenSea
cg10997860	OpenSea	cg11152263	N_Shore
cg11002119	OpenSea	cg11152384	OpenSea
cg11015241	OpenSea	cg11157172	OpenSea
cg11018018	S_Shelf	cg11161597	N_Shore
cg11026400	OpenSea	cg11166197	OpenSea
cg11051429	OpenSea	cg11169848	S_Shore
cg11056234	OpenSea	cg11185792	OpenSea
cg11066776	OpenSea	cg11198895	N_Shore
cg11074070	OpenSea	cg11201447	S_Shore
cg11075234	OpenSea	cg11202023	S_Shelf
cg11085294	OpenSea	cg11202686	OpenSea
cg11088135	S_Shelf	cg11205006	N_Shelf
cg11100126	OpenSea	cg11225751	Island
cg11111214	OpenSea	cg11256628	OpenSea
cg11115582	OpenSea	cg11257728	OpenSea
cg11116200	OpenSea	cg11267802	OpenSea
cg11121969	OpenSea	cg11290720	OpenSea
cg11147094	OpenSea	cg11303839	OpenSea
cg11150520	OpenSea	cg11310087	OpenSea
cg11198968	OpenSea	cg11311332	OpenSea
cg11199751	OpenSea	cg11314684	OpenSea
cg11202422	OpenSea	cg11322877	OpenSea
cg11217367	OpenSea	cg11323650	OpenSea
cg11227520	OpenSea	cg11328898	OpenSea
cg11249129	OpenSea	cg11329678	OpenSea
cg11254573	OpenSea	cg11353792	OpenSea
cg11273848	N_Shore	cg11360416	N_Shelf
cg11310812	OpenSea	cg11367259	OpenSea
cg11344075	OpenSea	cg11372934	OpenSea
cg11346333	OpenSea	cg11382945	S_Shelf
cg11350463	OpenSea	cg11392848	OpenSea
cg11365983	OpenSea	cg11427314	OpenSea
cg11371382	OpenSea	cg11453076	N_Shore
cg11374227	OpenSea	cg11453483	OpenSea
cg11375831	OpenSea	cg11460714	OpenSea
cg11388802	OpenSea	cg11468861	OpenSea
cg11430766	OpenSea	cg11474135	OpenSea
cg11437140	S_Shelf	cg11481582	S_Shore
cg11442280	OpenSea	cg11484413	OpenSea
cg11464074	OpenSea	cg11486694	OpenSea
cg11480029	OpenSea	cg11489090	OpenSea
cg11486285	OpenSea	cg11490805	OpenSea
cg11492063	OpenSea	cg11493223	S_Shore
cg11500569	S_Shelf	cg11518938	N_Shelf
cg11500790	OpenSea	cg11541382	OpenSea
cg11535506	OpenSea	cg11581627	OpenSea
cg11538307	OpenSea	cg11584519	N_Shelf
cg11547104	Island	cg11587635	N_Shelf
cg11589429	Island	cg11600734	OpenSea
cg11599721	OpenSea	cg11606261	S_Shore
cg11604519	S_Shelf	cg11637005	OpenSea
cg11606050	OpenSea	cg11640208	S_Shore
cg11629921	OpenSea	cg11653519	OpenSea
cg11642652	OpenSea	cg11658707	OpenSea
cg11645318	S_Shelf	cg11674130	OpenSea
cg11662345	OpenSea	cg11676189	S_Shelf
cg11677966	S_Shelf	cg11682724	OpenSea
cg11712188	OpenSea	cg11701372	OpenSea
cg11717251	S_Shelf	cg11706226	OpenSea
cg11719576	S_Shelf	cg11721464	Island
cg11729848	OpenSea	cg11726250	N_Shelf
cg11765851	N_Shore	cg11728821	OpenSea
cg11775579	OpenSea	cg11736104	OpenSea
cg11779118	OpenSea	cg11737334	S_Shelf
cg11788715	OpenSea	cg11737413	S_Shore
cg11792470	Island	cg11740026	OpenSea
cg11795128	OpenSea	cg11761483	OpenSea
cg11803101	OpenSea	cg11796565	N_Shore
cg11806762	OpenSea	cg11804789	OpenSea
cg11823318	S_Shelf	cg11834527	OpenSea
cg11854928	OpenSea	cg11838152	OpenSea
cg11866049	OpenSea	cg11854392	OpenSea
cg11869269	OpenSea	cg11868461	OpenSea
cg11871280	OpenSea	cg11871064	OpenSea
cg11890354	Island	cg11892240	OpenSea
cg11893412	OpenSea	cg11902777	N_Shore
cg11901695	OpenSea	cg11906021	OpenSea
cg11903197	OpenSea	cg11934819	OpenSea
cg11915787	Island	cg11940177	S_Shelf
cg11926510	Island	cg11950860	N_Shelf
cg11935812	OpenSea	cg11951818	S_Shore
cg11951158	N_Shelf	cg11957261	OpenSea
cg11956908	OpenSea	cg11961243	OpenSea
cg11966378	OpenSea	cg11969108	N_Shelf
cg11975608	OpenSea	cg11982525	N_Shelf
cg11976671	OpenSea	cg11988036	Island
cg11977941	OpenSea	cg11992736	OpenSea
cg11999886	OpenSea	cg12014181	OpenSea
cg12002119	OpenSea	cg12024564	OpenSea
cg12022102	S_Shelf	cg12024826	OpenSea
cg12027248	OpenSea	cg12039611	S_Shelf
cg12030639	OpenSea	cg12048965	OpenSea
cg12033248	OpenSea	cg12050706	OpenSea
cg12037895	OpenSea	cg12071775	OpenSea
cg12052613	OpenSea	cg12072262	OpenSea
cg12058385	OpenSea	cg12072740	OpenSea
cg12060838	OpenSea	cg12081643	OpenSea
cg12062156	OpenSea	cg12082048	OpenSea
cg12067292	N_Shelf	cg12114200	OpenSea
cg12071044	OpenSea	cg12123879	OpenSea
cg12077685	Island	cg12133423	N_Shore
cg12081389	OpenSea	cg12133962	OpenSea
cg12090430	OpenSea	cg12181083	OpenSea
cg12123470	S_Shore	cg12185873	OpenSea
cg12127290	OpenSea	cg12198140	OpenSea
cg12135457	OpenSea	cg12204343	OpenSea
cg12150401	OpenSea	cg12205230	OpenSea
cg12152703	OpenSea	cg12210293	N_Shelf
cg12188614	OpenSea	cg12219434	S_Shore
cg12205822	OpenSea	cg12232903	OpenSea
cg12242338	OpenSea	cg12244275	S_Shelf
cg12243633	S_Shore	cg12248672	N_Shore
cg12251828	OpenSea	cg12256469	N_Shelf
cg12256233	OpenSea	cg12269374	OpenSea
cg12256705	OpenSea	cg12272488	OpenSea
cg12257394	OpenSea	cg12273284	OpenSea
cg12268236	Island	cg12282588	OpenSea
cg12273694	S_Shore	cg12284382	S_Shelf
cg12277524	OpenSea	cg12311175	OpenSea
cg12279175	OpenSea	cg12311837	N_Shelf
cg12288994	S_Shore	cg12333160	Island
cg12315032	OpenSea	cg12346491	OpenSea
cg12375561	OpenSea	cg12355835	S_Shore
cg12377401	OpenSea	cg12362478	OpenSea
cg12382557	N_Shore	cg12366895	S_Shelf
cg12386808	OpenSea	cg12389461	OpenSea
cg12393275	OpenSea	cg12412089	OpenSea
cg12394910	OpenSea	cg12421138	OpenSea
cg12405684	S_Shelf	cg12423733	OpenSea
cg12417466	S_Shelf	cg12480053	OpenSea
cg12419766	S_Shore	cg12497543	OpenSea
cg12484411	OpenSea	cg12499211	S_Shelf
cg12485926	OpenSea	cg12510708	S_Shore
cg12497883	N_Shore	cg12523109	OpenSea
cg12509442	OpenSea	cg12526997	OpenSea
cg12510717	S_Shelf	cg12530080	OpenSea
cg12526614	OpenSea	cg12534147	OpenSea
cg12529457	OpenSea	cg12555810	OpenSea
cg12589098	OpenSea	cg12573705	N_Shore
cg12593431	S_Shore	cg12582777	OpenSea
cg12616434	OpenSea	cg12584100	OpenSea
cg12618806	OpenSea	cg12589188	N_Shelf
cg12621303	N_Shelf	cg12591668	OpenSea
cg12635191	Island	cg12593541	OpenSea
cg12637397	S_Shore	cg12595667	N_Shore
cg12647496	OpenSea	cg12616923	OpenSea
cg12649374	OpenSea	cg12634245	OpenSea
cg12666921	OpenSea	cg12646029	OpenSea
cg12676289	OpenSea	cg12656085	OpenSea
cg12685726	OpenSea	cg12658930	OpenSea
cg12693875	OpenSea	cg12659981	OpenSea
cg12694058	S_Shelf	cg12661316	OpenSea
cg12697833	OpenSea	cg12664038	N_Shore
cg12705212	N_Shelf	cg12675571	OpenSea
cg12717591	OpenSea	cg12686441	OpenSea
cg12728791	OpenSea	cg12697139	OpenSea
cg12743974	OpenSea	cg12699433	N_Shore
cg12750431	OpenSea	cg12718793	OpenSea
cg12778938	OpenSea	cg12720971	OpenSea
cg12779445	N_Shore	cg12732514	S_Shelf
cg12808290	OpenSea	cg12744758	OpenSea
cg12813711	OpenSea	cg12761965	OpenSea
cg12821876	Island	cg12763430	OpenSea
cg12830951	N_Shelf	cg12769118	OpenSea
cg12883617	OpenSea	cg12769705	OpenSea
cg12911208	OpenSea	cg12788666	OpenSea
cg12914615	OpenSea	cg12797746	N_Shelf
cg12917072	OpenSea	cg12802876	N_Shelf
cg12921481	OpenSea	cg12805552	OpenSea
cg12942932	OpenSea	cg12810503	OpenSea
cg12967902	S_Shore	cg12837919	OpenSea
cg12983741	OpenSea	cg12849224	N_Shore
cg13006360	S_Shelf	cg12905252	S_Shore
cg13022402	OpenSea	cg12906963	OpenSea
cg13031740	OpenSea	cg12909479	OpenSea
cg13035416	OpenSea	cg12911496	OpenSea
cg13049247	OpenSea	cg12920393	Island
cg13071778	OpenSea	cg12929160	OpenSea
cg13074908	Island	cg12931554	OpenSea
cg13090220	N_Shore	cg12939283	OpenSea
cg13114028	N_Shelf	cg12940747	OpenSea
cg13127591	OpenSea	cg12976310	OpenSea
cg13131878	OpenSea	cg12977772	N_Shore
cg13134808	OpenSea	cg12980549	OpenSea
cg13152531	OpenSea	cg12982531	OpenSea
cg13153698	OpenSea	cg12990035	OpenSea
cg13168617	OpenSea	cg13018120	OpenSea
cg13212525	OpenSea	cg13030790	OpenSea
cg13218831	N_Shelf	cg13035219	OpenSea
cg13242468	S_Shore	cg13062935	OpenSea
cg13248604	OpenSea	cg13065206	OpenSea
cg13277044	OpenSea	cg13065507	OpenSea
cg13290059	OpenSea	cg13067635	OpenSea
cg13291225	OpenSea	cg13073261	S_Shore
cg13306338	N_Shore	cg13076441	OpenSea
cg13315995	S_Shelf	cg13077865	OpenSea
cg13324288	OpenSea	cg13100449	OpenSea
cg13337716	OpenSea	cg13134497	OpenSea
cg13339771	OpenSea	cg13136655	OpenSea
cg13356285	S_Shore	cg13139843	OpenSea
cg13376246	OpenSea	cg13144783	OpenSea
cg13380622	OpenSea	cg13170031	OpenSea
cg13383010	OpenSea	cg13172906	N_Shore
cg13387869	S_Shelf	cg13185005	OpenSea
cg13392571	S_Shore	cg13205848	OpenSea
cg13394110	OpenSea	cg13215579	OpenSea
cg13396044	N_Shelf	cg13229867	OpenSea
cg13400969	OpenSea	cg13241663	OpenSea
cg13403566	OpenSea	cg13245264	OpenSea
cg13419549	OpenSea	cg13258131	OpenSea
cg13420207	OpenSea	cg13292703	OpenSea
cg13425422	OpenSea	cg13314394	Island
cg13447818	OpenSea	cg13316295	S_Shelf
cg13455634	OpenSea	cg13321166	OpenSea
cg13460670	OpenSea	cg13323489	Island
cg13461336	OpenSea	cg13351583	S_Shore
cg13467628	OpenSea	cg13359998	OpenSea
cg13474719	OpenSea	cg13366738	OpenSea
cg13479148	S_Shelf	cg13393678	OpenSea
cg13485248	OpenSea	cg13408605	OpenSea
cg13490244	OpenSea	cg13408752	N_Shelf
cg13492164	OpenSea	cg13410764	OpenSea
cg13501803	OpenSea	cg13413719	OpenSea
cg13523654	N_Shelf	cg13414270	OpenSea
cg13528199	N_Shore	cg13423140	OpenSea
cg13537487	OpenSea	cg13423554	OpenSea
cg13538648	OpenSea	cg13427361	S_Shelf
cg13546308	OpenSea	cg13432339	OpenSea
cg13554136	OpenSea	cg13436968	OpenSea
cg13600716	OpenSea	cg13444135	OpenSea
cg13604276	Island	cg13456086	S_Shore
cg13626639	S_Shore	cg13465946	Island
cg13627234	OpenSea	cg13466383	Island
cg13639452	OpenSea	cg13471990	OpenSea
cg13639866	OpenSea	cg13476901	S_Shore
cg13652536	OpenSea	cg13491731	N_Shelf
cg13665300	S_Shelf	cg13503382	Island
cg13672379	OpenSea	cg13544946	N_Shelf
cg13687795	OpenSea	cg13564020	OpenSea
cg13706769	N_Shore	cg13564460	S_Shelf
cg13711885	N_Shore	cg13570284	OpenSea
cg13713537	OpenSea	cg13578134	OpenSea
cg13716768	N_Shore	cg13581922	N_Shelf
cg13717540	OpenSea	cg13585930	OpenSea
cg13724732	OpenSea	cg13588483	OpenSea
cg13738382	OpenSea	cg13588517	N_Shelf
cg13746772	OpenSea	cg13594463	OpenSea
cg13748845	S_Shore	cg13628022	OpenSea
cg13769916	OpenSea	cg13636952	OpenSea
cg13776476	S_Shelf	cg13644626	S_Shelf
cg13782905	S_Shore	cg13655303	OpenSea
cg13797779	OpenSea	cg13676800	OpenSea
cg13806029	OpenSea	cg13690280	OpenSea
cg13837747	OpenSea	cg13720705	OpenSea
cg13840239	OpenSea	cg13735645	OpenSea
cg13874287	OpenSea	cg13745870	OpenSea
cg13895771	OpenSea	cg13780718	OpenSea
cg13915464	OpenSea	cg13783238	S_Shelf
cg13915719	OpenSea	cg13806966	N_Shore
cg13917863	OpenSea	cg13810673	OpenSea
cg13921214	S_Shore	cg13816042	OpenSea
cg13931845	OpenSea	cg13816428	OpenSea
cg13947317	S_Shore	cg13830300	OpenSea
cg13952838	OpenSea	cg13839563	OpenSea
cg13961318	OpenSea	cg13854219	OpenSea
cg13963735	OpenSea	cg13867370	OpenSea
cg13972171	OpenSea	cg13897122	OpenSea
cg13989810	OpenSea	cg13905899	OpenSea
cg13993877	N_Shore	cg13911785	OpenSea
cg13998145	S_Shore	cg13918472	N_Shore
cg14002754	Island	cg13921921	OpenSea
cg14009820	OpenSea	cg13922800	OpenSea
cg14026101	OpenSea	cg13933279	OpenSea
cg14032033	OpenSea	cg13941436	OpenSea
cg14037937	OpenSea	cg13942186	OpenSea
cg14044392	OpenSea	cg13951664	OpenSea
cg14051111	N_Shore	cg13954131	N_Shore
cg14061609	OpenSea	cg13981787	OpenSea
cg14069529	S_Shelf	cg13985234	OpenSea
cg14074945	OpenSea	cg13989664	OpenSea
cg14106420	OpenSea	cg14032261	OpenSea
cg14119936	OpenSea	cg14036402	OpenSea
cg14128018	OpenSea	cg14053030	OpenSea
cg14144771	OpenSea	cg14069088	S_Shore
cg14148690	OpenSea	cg14074184	OpenSea
cg14152912	S_Shore	cg14082893	OpenSea
cg14153740	OpenSea	cg14094027	OpenSea
cg14159007	OpenSea	cg14098951	S_Shore
cg14159256	OpenSea	cg14106046	N_Shelf
cg14179950	OpenSea	cg14118946	N_Shelf
cg14198450	OpenSea	cg14119792	OpenSea
cg14205169	OpenSea	cg14129735	OpenSea
cg14216734	OpenSea	cg14184077	OpenSea
cg14219236	OpenSea	cg14200127	OpenSea
cg14226671	OpenSea	cg14204586	OpenSea
cg14237069	N_Shore	cg14220224	OpenSea
cg14258236	OpenSea	cg14236389	OpenSea
cg14299508	OpenSea	cg14237903	N_Shore
cg14301000	OpenSea	cg14241836	N_Shelf
cg14328535	OpenSea	cg14251009	S_Shore
cg14352362	N_Shelf	cg14260083	S_Shore
cg14353278	OpenSea	cg14262740	OpenSea
cg14355941	OpenSea	cg14265709	N_Shelf
cg14361148	OpenSea	cg14327505	OpenSea
cg14362920	OpenSea	cg14330675	OpenSea
cg14368080	OpenSea	cg14340336	S_Shelf
cg14382249	OpenSea	cg14356799	OpenSea
cg14384014	OpenSea	cg14366742	OpenSea
cg14389665	OpenSea	cg14377720	OpenSea
cg14411311	OpenSea	cg14383572	OpenSea
cg14416456	N_Shelf	cg14385738	OpenSea
cg14483771	N_Shore	cg14393693	OpenSea
cg14487577	OpenSea	cg14398113	OpenSea
cg14504826	S_Shelf	cg14418756	S_Shore
cg14509032	OpenSea	cg14419194	OpenSea
cg14509761	OpenSea	cg14429209	S_Shelf
cg14517502	N_Shelf	cg14431072	OpenSea
cg14527639	OpenSea	cg14440974	N_Shelf
cg14531582	OpenSea	cg14441948	OpenSea
cg14535531	OpenSea	cg14443606	OpenSea
cg14544225	N_Shelf	cg14449958	OpenSea
cg14566081	OpenSea	cg14468856	OpenSea
cg14566901	OpenSea	cg14474520	S_Shore
cg14570051	OpenSea	cg14476095	OpenSea
cg14571619	OpenSea	cg14476948	OpenSea
cg14573268	OpenSea	cg14495359	S_Shelf
cg14581018	N_Shore	cg14506696	OpenSea
cg14590149	OpenSea	cg14511375	S_Shore
cg14594966	OpenSea	cg14511923	N_Shore
cg14596602	OpenSea	cg14527333	S_Shelf
cg14600041	OpenSea	cg14534848	S_Shelf
cg14622659	OpenSea	cg14541801	OpenSea
cg14651293	OpenSea	cg14552904	OpenSea
cg14652717	OpenSea	cg14595786	OpenSea
cg14655360	OpenSea	cg14606858	OpenSea
cg14690980	OpenSea	cg14640466	OpenSea
cg14691921	OpenSea	cg14653988	OpenSea
cg14714749	OpenSea	cg14698665	S_Shelf
cg14715383	Island	cg14701018	OpenSea
cg14718495	OpenSea	cg14714222	N_Shelf
cg14724899	OpenSea	cg14727409	OpenSea
cg14743683	OpenSea	cg14728380	S_Shore
cg14747065	N_Shore	cg14729148	S_Shore
cg14758105	N_Shore	cg14731462	OpenSea
cg14772660	S_Shelf	cg14737484	N_Shore
cg14779376	OpenSea	cg14761514	OpenSea
cg14779473	OpenSea	cg14797990	OpenSea
cg14842771	OpenSea	cg14802502	OpenSea
cg14844624	OpenSea	cg14824052	OpenSea
cg14846981	N_Shelf	cg14826683	OpenSea
cg14852736	OpenSea	cg14840351	OpenSea
cg14864352	OpenSea	cg14844130	OpenSea
cg14891617	OpenSea	cg14844341	Island
cg14905577	OpenSea	cg14846617	OpenSea
cg14935163	OpenSea	cg14851578	N_Shore
cg14968768	OpenSea	cg14872762	OpenSea
cg14976001	OpenSea	cg14903245	S_Shore
cg14980260	OpenSea	cg14928510	N_Shore
cg14989351	OpenSea	cg14939821	OpenSea
cg14990071	OpenSea	cg14940871	Island
cg15057359	OpenSea	cg14944923	OpenSea
cg15080590	N_Shore	cg14954582	OpenSea
cg15082843	OpenSea	cg14970987	OpenSea
cg15087740	OpenSea	cg14978994	S_Shore
cg15095602	OpenSea	cg14979674	OpenSea
cg15095926	OpenSea	cg14992768	OpenSea
cg15108640	OpenSea	cg15001406	OpenSea
cg15127613	OpenSea	cg15005368	Island
cg15149374	OpenSea	cg15006828	OpenSea
cg15154519	OpenSea	cg15021280	OpenSea
cg15204286	OpenSea	cg15059851	OpenSea
cg15209921	OpenSea	cg15065877	OpenSea
cg15212895	S_Shore	cg15078838	S_Shore
cg15236149	OpenSea	cg15129183	OpenSea
cg15248242	OpenSea	cg15142042	S_Shore
cg15267216	OpenSea	cg15189015	OpenSea
cg15288779	N_Shore	cg15202552	OpenSea
cg15297028	OpenSea	cg15210787	OpenSea
cg15326535	N_Shore	cg15213491	OpenSea
cg15328241	N_Shore	cg15219347	S_Shore
cg15329510	OpenSea	cg15224459	N_Shore
cg15340191	OpenSea	cg15244965	OpenSea
cg15346952	S_Shelf	cg15268191	OpenSea
cg15382659	OpenSea	cg15278262	OpenSea
cg15391425	S_Shore	cg15284177	OpenSea
cg15392618	N_Shelf	cg15291905	N_Shelf
cg15443530	OpenSea	cg15300436	OpenSea
cg15448736	N_Shore	cg15319576	OpenSea
cg15449979	S_Shelf	cg15320998	N_Shore
cg15456293	N_Shelf	cg15331705	OpenSea
cg15461781	OpenSea	cg15339164	OpenSea
cg15475714	OpenSea	cg15377887	OpenSea
cg15498563	OpenSea	cg15389025	N_Shore
cg15531411	OpenSea	cg15391590	OpenSea
cg15545269	OpenSea	cg15462970	OpenSea
cg15547734	OpenSea	cg15466952	S_Shelf
cg15553628	OpenSea	cg15496763	OpenSea
cg15553840	OpenSea	cg15498306	OpenSea
cg15553852	OpenSea	cg15500907	OpenSea
cg15571423	OpenSea	cg15506036	OpenSea
cg15583193	OpenSea	cg15507690	S_Shelf
cg15585183	OpenSea	cg15572745	OpenSea
cg15601682	OpenSea	cg15585987	S_Shore
cg15609462	OpenSea	cg15595525	N_Shore
cg15614730	OpenSea	cg15601264	OpenSea
cg15623111	Island	cg15602548	S_Shore
cg15626797	OpenSea	cg15619439	OpenSea
cg15638239	OpenSea	cg15645309	OpenSea
cg15642035	OpenSea	cg15646741	OpenSea
cg15648060	OpenSea	cg15690511	OpenSea
cg15656087	Island	cg15692837	OpenSea
cg15664943	OpenSea	cg15711727	N_Shore
cg15669879	OpenSea	cg15722679	OpenSea
cg15684577	OpenSea	cg15735620	OpenSea
cg15692172	N_Shelf	cg15735736	N_Shelf
cg15696462	OpenSea	cg15746620	OpenSea
cg15726040	OpenSea	cg15791108	S_Shore
cg15733245	Island	cg15803618	OpenSea
cg15743325	OpenSea	cg15811371	OpenSea
cg15749661	OpenSea	cg15812586	OpenSea
cg15756928	OpenSea	cg15818008	OpenSea
cg15775200	OpenSea	cg15818715	OpenSea
cg15799791	N_Shore	cg15835312	OpenSea
cg15816712	OpenSea	cg15858970	OpenSea
cg15823330	S_Shelf	cg15873474	N_Shelf
cg15840418	OpenSea	cg15876968	Island
cg15841828	OpenSea	cg15887927	OpenSea
cg15851696	OpenSea	cg15905666	OpenSea
cg15852352	OpenSea	cg15908975	OpenSea
cg15857627	S_Shelf	cg15923484	OpenSea
cg15859416	Island	cg15924868	OpenSea
cg15879620	OpenSea	cg15928106	OpenSea
cg15889462	OpenSea	cg15941014	OpenSea
cg15896117	S_Shelf	cg15950504	OpenSea
cg15896151	N_Shelf	cg15952487	OpenSea
cg15899053	OpenSea	cg15958289	OpenSea
cg15909393	OpenSea	cg15972148	S_Shore
cg15910070	OpenSea	cg16016319	OpenSea
cg15915835	N_Shelf	cg16021678	OpenSea
cg15919689	OpenSea	cg16035777	OpenSea
cg15975443	OpenSea	cg16046375	S_Shore
cg15983528	OpenSea	cg16047279	OpenSea
cg16002908	OpenSea	cg16055526	N_Shore
cg16013919	N_Shore	cg16071125	OpenSea
cg16027403	OpenSea	cg16072777	OpenSea
cg16048803	S_Shelf	cg16079414	OpenSea
cg16057401	OpenSea	cg16094145	S_Shore
cg16065473	OpenSea	cg16107470	OpenSea
cg16066871	OpenSea	cg16151924	OpenSea
cg16069359	OpenSea	cg16169675	N_Shelf
cg16074812	N_Shelf	cg16179938	N_Shelf
cg16084363	OpenSea	cg16180082	OpenSea
cg16086416	OpenSea	cg16184008	OpenSea
cg16091055	OpenSea	cg16210842	OpenSea
cg16111259	OpenSea	cg16226642	OpenSea
cg16113905	OpenSea	cg16236785	S_Shelf
cg16121641	OpenSea	cg16252110	Island
cg16121807	S_Shore	cg16253976	OpenSea
cg16123848	OpenSea	cg16257533	OpenSea
cg16157288	OpenSea	cg16258657	OpenSea
cg16179048	OpenSea	cg16265542	OpenSea
cg16191088	Island	cg16268473	OpenSea
cg16202419	OpenSea	cg16270399	OpenSea
cg16214826	OpenSea	cg16274207	OpenSea
cg16238351	OpenSea	cg16281534	OpenSea
cg16246200	Island	cg16321029	OpenSea
cg16252868	OpenSea	cg16331599	OpenSea
cg16258888	OpenSea	cg16337763	OpenSea
cg16298813	S_Shore	cg16338011	OpenSea
cg16300707	OpenSea	cg16341266	OpenSea
cg16314263	OpenSea	cg16342115	S_Shore
cg16320885	OpenSea	cg16354520	OpenSea
cg16325826	N_Shelf	cg16385583	OpenSea
cg16327839	OpenSea	cg16409012	OpenSea
cg16334004	Island	cg16423499	OpenSea
cg16334127	OpenSea	cg16436762	OpenSea
cg16358696	N_Shore	cg16453474	OpenSea
cg16369366	N_Shore	cg16456252	OpenSea
cg16377959	OpenSea	cg16459667	OpenSea
cg16381207	OpenSea	cg16468417	OpenSea
cg16387516	OpenSea	cg16476991	OpenSea
cg16412460	N_Shore	cg16497714	OpenSea
cg16433587	OpenSea	cg16505233	OpenSea
cg16437048	OpenSea	cg16522250	OpenSea
cg16456576	N_Shore	cg16522370	OpenSea
cg16465407	OpenSea	cg16532262	OpenSea
cg16509592	OpenSea	cg16540590	OpenSea
cg16515477	OpenSea	cg16578568	OpenSea
cg16516973	OpenSea	cg16589802	N_Shore
cg16518165	OpenSea	cg16594139	Island
cg16524286	S_Shelf	cg16596317	OpenSea
cg16526509	OpenSea	cg16612806	S_Shelf
cg16527112	OpenSea	cg16616514	OpenSea
cg16528678	S_Shelf	cg16659026	N_Shore
cg16539721	OpenSea	cg16662768	OpenSea
cg16557061	N_Shelf	cg16679068	OpenSea
cg16602816	OpenSea	cg16684661	N_Shore
cg16604126	OpenSea	cg16689937	OpenSea
cg16626196	OpenSea	cg16692277	OpenSea
cg16635578	S_Shelf	cg16694785	N_Shore
cg16636226	S_Shelf	cg16696923	OpenSea
cg16636550	N_Shore	cg16720578	N_Shelf
cg16638793	OpenSea	cg16723381	OpenSea
cg16649915	OpenSea	cg16728539	OpenSea
cg16651441	N_Shore	cg16742703	OpenSea
cg16653700	OpenSea	cg16743754	S_Shelf
cg16665686	OpenSea	cg16746221	OpenSea
cg16678467	N_Shore	cg16776350	OpenSea
cg16679630	OpenSea	cg16779498	OpenSea
cg16679832	OpenSea	cg16783186	OpenSea
cg16702467	OpenSea	cg16790374	OpenSea
cg16702469	OpenSea	cg16843056	OpenSea
cg16705697	OpenSea	cg16861964	OpenSea
cg16717546	OpenSea	cg16893868	OpenSea
cg16734913	OpenSea	cg16905265	S_Shelf
cg16748816	OpenSea	cg16938363	Island
cg16753400	OpenSea	cg16942223	OpenSea
cg16754015	N_Shore	cg16947583	OpenSea
cg16770697	Island	cg16965605	OpenSea
cg16782925	OpenSea	cg16983723	OpenSea
cg16796164	OpenSea	cg16993682	OpenSea
cg16796848	S_Shore	cg17004653	OpenSea
cg16822143	OpenSea	cg17022548	OpenSea
cg16834356	OpenSea	cg17051704	OpenSea
cg16836224	OpenSea	cg17067544	OpenSea
cg16842017	OpenSea	cg17069068	OpenSea
cg16845880	OpenSea	cg17073891	OpenSea
cg16873151	OpenSea	cg17079374	OpenSea
cg16885235	OpenSea	cg17099048	OpenSea
cg16898334	Island	cg17118262	OpenSea
cg16905907	OpenSea	cg17131837	OpenSea
cg16917068	N_Shore	cg17133774	N_Shelf
cg16922446	OpenSea	cg17134153	OpenSea
cg16958668	OpenSea	cg17162578	N_Shelf
cg16958715	N_Shelf	cg17163729	N_Shelf
cg16964478	OpenSea	cg17169998	OpenSea
cg16967830	S_Shore	cg17173423	OpenSea
cg17022244	N_Shore	cg17178175	OpenSea
cg17025560	N_Shelf	cg17199113	S_Shelf
cg17033087	OpenSea	cg17209188	OpenSea
cg17042000	N_Shelf	cg17214408	OpenSea
cg17057663	N_Shelf	cg17221083	OpenSea
cg17059136	OpenSea	cg17242596	OpenSea
cg17062665	N_Shelf	cg17247190	OpenSea
cg17079431	OpenSea	cg17251713	OpenSea
cg17088562	OpenSea	cg17265300	OpenSea
cg17090716	N_Shore	cg17277001	N_Shore
cg17101720	OpenSea	cg17289451	OpenSea
cg17127146	OpenSea	cg17315219	Island
cg17128505	OpenSea	cg17315454	OpenSea
cg17130745	OpenSea	cg17336139	Island
cg17159698	Island	cg17338146	OpenSea
cg17165055	OpenSea	cg17347941	S_Shelf
cg17174400	OpenSea	cg17372657	OpenSea
cg17185622	OpenSea	cg17388024	OpenSea
cg17192862	OpenSea	cg17388996	OpenSea
cg17208425	S_Shelf	cg17390890	OpenSea
cg17244238	N_Shore	cg17412901	S_Shore
cg17254961	OpenSea	cg17467525	N_Shore
cg17267710	OpenSea	cg17477052	OpenSea
cg17271677	OpenSea	cg17481235	OpenSea
cg17271970	S_Shelf	cg17484237	OpenSea
cg17280284	OpenSea	cg17494199	OpenSea
cg17281031	OpenSea	cg17501395	OpenSea
cg17281600	OpenSea	cg17514199	OpenSea
cg17282592	OpenSea	cg17514766	OpenSea
cg17289942	OpenSea	cg17518550	OpenSea
cg17301052	OpenSea	cg17519479	S_Shelf
cg17316078	OpenSea	cg17520000	OpenSea
cg17319718	S_Shore	cg17520909	OpenSea
cg17335499	OpenSea	cg17527177	OpenSea
cg17340556	OpenSea	cg17551002	OpenSea
cg17341136	N_Shelf	cg17570276	S_Shore
cg17341904	OpenSea	cg17571559	OpenSea
cg17364913	OpenSea	cg17578341	OpenSea
cg17377211	OpenSea	cg17590227	OpenSea
cg17382888	N_Shore	cg17622246	S_Shelf
cg17417049	S_Shelf	cg17626301	N_Shore
cg17423978	OpenSea	cg17654585	S_Shelf
cg17440085	OpenSea	cg17654970	OpenSea
cg17444859	OpenSea	cg17670237	OpenSea
cg17470497	OpenSea	cg17670263	OpenSea
cg17491339	OpenSea	cg17699374	OpenSea
cg17504886	OpenSea	cg17713010	OpenSea
cg17506178	OpenSea	cg17715141	OpenSea
cg17515793	N_Shelf	cg17725851	OpenSea
cg17526441	OpenSea	cg17752270	OpenSea
cg17527969	N_Shore	cg17754782	OpenSea
cg17538768	OpenSea	cg17755913	OpenSea
cg17542385	OpenSea	cg17771150	OpenSea
cg17544672	OpenSea	cg17781789	Island
cg17546215	OpenSea	cg17783317	OpenSea
cg17562528	OpenSea	cg17795695	OpenSea
cg17604429	OpenSea	cg17842821	OpenSea
cg17606183	OpenSea	cg17890940	N_Shore
cg17628556	OpenSea	cg17895446	OpenSea
cg17675852	Island	cg17922998	OpenSea
cg17680303	OpenSea	cg17949402	Island
cg17689601	OpenSea	cg17952114	S_Shore
cg17695512	OpenSea	cg17954695	OpenSea
cg17718728	OpenSea	cg17957235	S_Shelf
cg17727795	OpenSea	cg17961381	OpenSea
cg17731243	OpenSea	cg17967602	OpenSea
cg17735631	N_Shore	cg17969683	OpenSea
cg17747635	OpenSea	cg18044044	OpenSea
cg17752799	OpenSea	cg18049228	OpenSea
cg17755518	N_Shelf	cg18054725	OpenSea
cg17772793	OpenSea	cg18071348	OpenSea
cg17774418	OpenSea	cg18096251	OpenSea
cg17805202	OpenSea	cg18098839	OpenSea
cg17805836	OpenSea	cg18114040	OpenSea
cg17806717	OpenSea	cg18117039	N_Shore
cg17824277	N_Shore	cg18131582	OpenSea
cg17826043	OpenSea	cg18140889	OpenSea
cg17827328	OpenSea	cg18142906	OpenSea
cg17853642	Island	cg18154283	OpenSea
cg17868723	OpenSea	cg18187244	N_Shore
cg17871403	OpenSea	cg18187729	OpenSea
cg17878273	N_Shelf	cg18195238	OpenSea
cg17879133	OpenSea	cg18207999	S_Shelf
cg17904797	OpenSea	cg18236464	OpenSea
cg17908564	OpenSea	cg18263166	OpenSea
cg17908657	OpenSea	cg18272889	S_Shore
cg17922326	OpenSea	cg18285788	N_Shore
cg17932055	N_Shelf	cg18310495	N_Shore
cg17937722	OpenSea	cg18313094	S_Shelf
cg17955766	OpenSea	cg18343292	OpenSea
cg17968511	OpenSea	cg18345924	S_Shore
cg17978103	OpenSea	cg18361418	OpenSea
cg17993092	OpenSea	cg18362003	OpenSea
cg18042632	OpenSea	cg18369913	OpenSea
cg18069174	Island	cg18372207	OpenSea
cg18081687	OpenSea	cg18407309	OpenSea
cg18091245	OpenSea	cg18410945	N_Shelf
cg18122501	Island	cg18413706	OpenSea
cg18130930	OpenSea	cg18418051	OpenSea
cg18142856	OpenSea	cg18425570	OpenSea
cg18146221	OpenSea	cg18442362	OpenSea
cg18179621	OpenSea	cg18452973	OpenSea
cg18184033	OpenSea	cg18458509	N_Shelf
cg18187035	Island	cg18475969	OpenSea
cg18202765	OpenSea	cg18504196	OpenSea
cg18202928	OpenSea	cg18530956	N_Shelf
cg18205883	OpenSea	cg18537464	OpenSea
cg18206137	OpenSea	cg18553223	OpenSea
cg18236250	OpenSea	cg18565717	Island
cg18238570	OpenSea	cg18594701	OpenSea
cg18269894	Island	cg18618815	N_Shore
cg18292763	N_Shelf	cg18640514	OpenSea
cg18307463	OpenSea	cg18647237	N_Shore
cg18341491	OpenSea	cg18670236	OpenSea
cg18366249	OpenSea	cg18705155	N_Shelf
cg18371836	OpenSea	cg18707501	OpenSea
cg18387198	N_Shore	cg18721397	N_Shore
cg18399935	S_Shelf	cg18729298	N_Shore
cg18405691	OpenSea	cg18732541	N_Shelf
cg18431655	OpenSea	cg18739537	N_Shore
cg18432768	OpenSea	cg18740359	OpenSea
cg18438823	OpenSea	cg18743793	N_Shelf
cg18447785	OpenSea	cg18750756	OpenSea
cg18449050	OpenSea	cg18772376	OpenSea
cg18460938	OpenSea	cg18781031	OpenSea
cg18496543	OpenSea	cg18844145	N_Shelf
cg18543971	OpenSea	cg18857759	OpenSea
cg18580232	OpenSea	cg18882687	OpenSea
cg18601422	N_Shore	cg18910298	OpenSea
cg18601466	N_Shore	cg18949521	OpenSea
cg18603788	OpenSea	cg18951390	OpenSea
cg18613344	OpenSea	cg18968409	OpenSea
cg18620300	OpenSea	cg18975416	OpenSea
cg18622075	OpenSea	cg18998172	OpenSea
cg18627442	Island	cg19011552	OpenSea
cg18639524	OpenSea	cg19027424	OpenSea
cg18677812	OpenSea	cg19050555	S_Shelf
cg18679069	OpenSea	cg19061270	S_Shore
cg18696912	OpenSea	cg19061690	OpenSea
cg18701449	OpenSea	cg19070138	N_Shelf
cg18719217	Island	cg19075787	OpenSea
cg18739944	OpenSea	cg19082359	OpenSea
cg18754857	OpenSea	cg19086905	OpenSea
cg18771659	OpenSea	cg19089701	OpenSea
cg18781372	OpenSea	cg19090437	OpenSea
cg18786237	N_Shelf	cg19111408	OpenSea
cg18792709	OpenSea	cg19115610	S_Shelf
cg18795022	OpenSea	cg19127840	OpenSea
cg18803856	Island	cg19143208	OpenSea
cg18805027	N_Shore	cg19143211	OpenSea
cg18814069	OpenSea	cg19168192	OpenSea
cg18814174	N_Shore	cg19235071	OpenSea
cg18817158	OpenSea	cg19239041	OpenSea
cg18828137	OpenSea	cg19248557	OpenSea
cg18829162	Island	cg19275692	OpenSea
cg18855621	OpenSea	cg19314136	S_Shelf
cg18861787	OpenSea	cg19319037	S_Shore
cg18876728	OpenSea	cg19319487	OpenSea
cg18888872	OpenSea	cg19321979	N_Shore
cg18889973	S_Shore	cg19328560	N_Shelf
cg18944144	OpenSea	cg19350216	S_Shore
cg18948899	S_Shore	cg19368016	OpenSea
cg18953078	OpenSea	cg19371339	OpenSea
cg18964985	OpenSea	cg19380156	OpenSea
cg18982568	OpenSea	cg19388930	OpenSea
cg18984833	OpenSea	cg19391247	OpenSea
cg18986165	OpenSea	cg19408145	OpenSea
cg19001113	N_Shelf	cg19413693	OpenSea
cg19020434	S_Shelf	cg19419054	OpenSea
cg19082304	Island	cg19433175	S_Shelf
cg19099433	N_Shelf	cg19434183	OpenSea
cg19106237	OpenSea	cg19485103	OpenSea
cg19126954	N_Shelf	cg19486070	OpenSea
cg19153329	OpenSea	cg19486673	OpenSea
cg19155735	OpenSea	cg19496554	OpenSea
cg19158549	OpenSea	cg19502709	OpenSea
cg19180636	OpenSea	cg19526685	OpenSea
cg19188899	OpenSea	cg19562321	OpenSea
cg19220930	S_Shelf	cg19579500	Island
cg19265886	OpenSea	cg19588399	OpenSea
cg19279346	OpenSea	cg19598189	OpenSea
cg19286989	OpenSea	cg19602728	S_Shore
cg19332610	N_Shelf	cg19653345	OpenSea
cg19341106	OpenSea	cg19670883	OpenSea
cg19345277	OpenSea	cg19685398	OpenSea
cg19365527	OpenSea	cg19695507	OpenSea
cg19378892	OpenSea	cg19698168	OpenSea
cg19388972	OpenSea	cg19717640	OpenSea
cg19390059	OpenSea	cg19728345	OpenSea
cg19404723	OpenSea	cg19734013	OpenSea
cg19407023	N_Shore	cg19734536	OpenSea
cg19422460	Island	cg19735804	OpenSea
cg19431623	OpenSea	cg19738121	S_Shelf
cg19452338	OpenSea	cg19743254	OpenSea
cg19463078	OpenSea	cg19770292	OpenSea
cg19476643	OpenSea	cg19772066	S_Shore
cg19479935	N_Shelf	cg19779965	OpenSea
cg19484995	OpenSea	cg19781462	OpenSea
cg19486175	N_Shore	cg19787070	OpenSea
cg19497640	S_Shelf	cg19789753	Island
cg19508823	OpenSea	cg19790640	S_Shore
cg19509988	OpenSea	cg19801646	OpenSea
cg19510409	OpenSea	cg19814116	Island
cg19519911	OpenSea	cg19826026	OpenSea
cg19530845	OpenSea	cg19828516	OpenSea
cg19532959	S_Shelf	cg19836199	OpenSea
cg19539664	N_Shore	cg19836549	OpenSea
cg19547155	OpenSea	cg19838087	OpenSea
cg19549902	S_Shelf	cg19853494	OpenSea
cg19571360	OpenSea	cg19854744	OpenSea
cg19580003	N_Shelf	cg19856444	OpenSea
cg19582128	S_Shelf	cg19867107	OpenSea
cg19597074	OpenSea	cg19871597	OpenSea
cg19597545	OpenSea	cg19919590	OpenSea
cg19608778	OpenSea	cg19922435	OpenSea
cg19631815	N_Shelf	cg19930575	OpenSea
cg19637048	OpenSea	cg19933965	OpenSea
cg19639967	OpenSea	cg19938167	OpenSea
cg19655179	OpenSea	cg19938199	OpenSea
cg19660744	OpenSea	cg19945931	Island
cg19666687	OpenSea	cg19984681	OpenSea
cg19689679	OpenSea	cg19991916	N_Shore
cg19722689	OpenSea	cg20031717	OpenSea
cg19724485	OpenSea	cg20031845	OpenSea
cg19725625	OpenSea	cg20040765	OpenSea
cg19748436	OpenSea	cg20056997	OpenSea
cg19766363	OpenSea	cg20092122	OpenSea
cg19771975	S_Shelf	cg20103692	OpenSea
cg19811231	OpenSea	cg20116800	N_Shelf
cg19825203	OpenSea	cg20117103	OpenSea
cg19825483	OpenSea	cg20126775	OpenSea
cg19827555	OpenSea	cg20143111	OpenSea
cg19835595	OpenSea	cg20168964	OpenSea
cg19851481	OpenSea	cg20228731	OpenSea
cg19857707	OpenSea	cg20249071	OpenSea
cg19878326	OpenSea	cg20250250	OpenSea
cg19884600	OpenSea	cg20261167	OpenSea
cg19904031	OpenSea	cg20272884	OpenSea
cg19907968	OpenSea	cg20288565	Island
cg19939130	OpenSea	cg20307292	OpenSea
cg19942977	OpenSea	cg20311002	OpenSea
cg19959088	S_Shelf	cg20358011	OpenSea
cg19961312	OpenSea	cg20360395	N_Shelf
cg19977977	S_Shelf	cg20393620	OpenSea
cg19992785	OpenSea	cg20395040	OpenSea
cg19995964	OpenSea	cg20395881	OpenSea
cg20033771	N_Shore	cg20415092	OpenSea
cg20051118	OpenSea	cg20426042	OpenSea
cg20077718	OpenSea	cg20427486	OpenSea
cg20091187	OpenSea	cg20432671	N_Shore
cg20109840	Island	cg20447966	OpenSea
cg20111179	OpenSea	cg20449074	OpenSea
cg20137179	OpenSea	cg20463298	OpenSea
cg20152326	OpenSea	cg20465661	OpenSea
cg20189036	N_Shelf	cg20466478	S_Shore
cg20214135	S_Shore	cg20469935	OpenSea
cg20251156	OpenSea	cg20473420	OpenSea
cg20265953	OpenSea	cg20476019	OpenSea
cg20355735	OpenSea	cg20481032	N_Shelf
cg20368664	OpenSea	cg20539142	OpenSea
cg20369838	S_Shore	cg20543651	OpenSea
cg20374317	OpenSea	cg20559385	OpenSea
cg20378520	OpenSea	cg20564969	S_Shore
cg20383064	OpenSea	cg20591407	S_Shore
cg20410409	OpenSea	cg20600379	OpenSea
cg20424189	OpenSea	cg20608075	OpenSea
cg20428713	OpenSea	cg20617328	OpenSea
cg20434562	N_Shore	cg20646846	N_Shore
cg20455570	OpenSea	cg20662737	OpenSea
cg20490724	OpenSea	cg20663432	OpenSea
cg20490751	OpenSea	cg20678353	OpenSea
cg20500869	OpenSea	cg20688651	S_Shore
cg20513842	S_Shelf	cg20697025	OpenSea
cg20520709	S_Shelf	cg20705893	OpenSea
cg20525229	OpenSea	cg20741105	OpenSea
cg20539811	OpenSea	cg20769842	OpenSea
cg20550146	N_Shelf	cg20769856	OpenSea
cg20597215	OpenSea	cg20777796	S_Shore
cg20615517	OpenSea	cg20778958	OpenSea
cg20624429	OpenSea	cg20788020	OpenSea
cg20675539	OpenSea	cg20793532	OpenSea
cg20676475	OpenSea	cg20795023	N_Shelf
cg20682720	OpenSea	cg20799165	OpenSea
cg20698137	OpenSea	cg20804072	OpenSea
cg20703895	OpenSea	cg20821042	OpenSea
cg20712955	OpenSea	cg20821800	OpenSea
cg20716703	S_Shore	cg20827128	OpenSea
cg20727124	OpenSea	cg20839149	S_Shelf
cg20742415	OpenSea	cg20853771	N_Shore
cg20760156	OpenSea	cg20868817	OpenSea
cg20770989	OpenSea	cg20906524	OpenSea
cg20778022	OpenSea	cg20914792	OpenSea
cg20785459	OpenSea	cg20928777	OpenSea
cg20809036	OpenSea	cg20939114	OpenSea
cg20814158	OpenSea	cg20945764	N_Shelf
cg20820759	S_Shore	cg20955688	OpenSea
cg20856834	OpenSea	cg20968743	OpenSea
cg20923085	OpenSea	cg20972294	OpenSea
cg20951642	OpenSea	cg20979737	OpenSea
cg20984904	S_Shelf	cg20994660	N_Shore
cg21018156	OpenSea	cg21012737	OpenSea
cg21032583	N_Shore	cg21028981	OpenSea
cg21035669	OpenSea	cg21033171	OpenSea
cg21039932	N_Shelf	cg21037265	OpenSea
cg21045636	OpenSea	cg21067465	OpenSea
cg21078966	OpenSea	cg21069434	N_Shore
cg21087481	OpenSea	cg21080533	OpenSea
cg21103170	OpenSea	cg21100638	OpenSea
cg21109025	OpenSea	cg21108085	S_Shelf
cg21135516	OpenSea	cg21109192	OpenSea
cg21159274	S_Shore	cg21129006	OpenSea
cg21164813	OpenSea	cg21130255	OpenSea
cg21168134	OpenSea	cg21145248	OpenSea
cg21175174	S_Shelf	cg21163701	OpenSea
cg21180080	S_Shelf	cg21176130	Island
cg21185990	OpenSea	cg21207403	OpenSea
cg21216258	S_Shore	cg21213593	N_Shelf
cg21228157	OpenSea	cg21216010	OpenSea
cg21243351	OpenSea	cg21221571	OpenSea
cg21252355	S_Shelf	cg21231262	OpenSea
cg21252529	S_Shelf	cg21243631	OpenSea
cg21262652	OpenSea	cg21243848	OpenSea
cg21267167	OpenSea	cg21244322	OpenSea
cg21292587	OpenSea	cg21263710	N_Shelf
cg21308760	OpenSea	cg21272713	N_Shelf
cg21312148	OpenSea	cg21273275	Island
cg21312929	OpenSea	cg21291134	OpenSea
cg21341435	OpenSea	cg21295575	OpenSea
cg21347347	OpenSea	cg21301224	OpenSea
cg21354912	OpenSea	cg21320334	OpenSea
cg21375105	OpenSea	cg21320573	OpenSea
cg21375490	S_Shore	cg21325485	S_Shore
cg21392204	OpenSea	cg21337717	OpenSea
cg21400442	OpenSea	cg21342392	S_Shore
cg21415527	OpenSea	cg21367256	OpenSea
cg21425607	OpenSea	cg21370522	OpenSea
cg21439800	S_Shore	cg21400802	OpenSea
cg21454777	OpenSea	cg21431832	N_Shelf
cg21462681	OpenSea	cg21454485	OpenSea
cg21470503	S_Shelf	cg21468949	OpenSea
cg21491967	OpenSea	cg21501358	S_Shore
cg21492137	OpenSea	cg21531389	OpenSea
cg21512502	OpenSea	cg21538684	OpenSea
cg21534317	OpenSea	cg21557108	OpenSea
cg21542666	OpenSea	cg21571658	OpenSea
cg21544698	Island	cg21574271	OpenSea
cg21546532	OpenSea	cg21579399	S_Shelf
cg21551985	OpenSea	cg21594839	OpenSea
cg21578543	OpenSea	cg21603744	OpenSea
cg21579197	OpenSea	cg21614638	OpenSea
cg21582489	S_Shelf	cg21650866	S_Shore
cg21596825	OpenSea	cg21656937	N_Shelf
cg21605238	S_Shelf	cg21661379	OpenSea
cg21618455	OpenSea	cg21669326	OpenSea
cg21629640	OpenSea	cg21672992	OpenSea
cg21639436	N_Shelf	cg21711862	N_Shelf
cg21648009	N_Shelf	cg21720373	S_Shelf
cg21661864	OpenSea	cg21745092	S_Shelf
cg21661983	OpenSea	cg21746275	S_Shelf
cg21665448	N_Shelf	cg21746425	OpenSea
cg21680307	N_Shelf	cg21749794	N_Shore
cg21685770	OpenSea	cg21765235	OpenSea
cg21708692	OpenSea	cg21769093	S_Shelf
cg21730118	S_Shelf	cg21773297	S_Shelf
cg21741679	OpenSea	cg21773820	OpenSea
cg21749556	OpenSea	cg21794066	OpenSea
cg21750915	OpenSea	cg21805936	OpenSea
cg21751739	S_Shelf	cg21820394	OpenSea
cg21755806	OpenSea	cg21847347	OpenSea
cg21757820	OpenSea	cg21851391	OpenSea
cg21763603	S_Shelf	cg21855211	Island
cg21768418	OpenSea	cg21876918	OpenSea
cg21772735	N_Shore	cg21884064	N_Shelf
cg21787997	OpenSea	cg21890423	OpenSea
cg21816377	OpenSea	cg21899374	N_Shelf
cg21833366	OpenSea	cg21906379	OpenSea
[truncated: 513 more rows]

## Sheet: TableS4_Top_Probes_Hyper
Table S4. Top 10% probes identified in the hypermethylation direction
∆Meth only		Rel ∆Meth only		Overlap
ID	Relation_to_Island	ID	Relation_to_Island	ID	Relation_to_Island
cg00008488	N_Shore	cg00002837	OpenSea	cg00002719	Island
cg00009292	Island	cg00011616	OpenSea	cg00060320	Island
cg00020191	OpenSea	cg00017826	OpenSea	cg00063471	Island
cg00020649	Island	cg00018128	S_Shore	cg00065215	Island
cg00031165	Island	cg00022997	Island	cg00100121	Island
cg00058329	Island	cg00025331	Island	cg00103785	N_Shore
cg00095976	Island	cg00039463	Island	cg00109076	S_Shore
cg00119181	Island	cg00043510	N_Shore	cg00215432	Island
cg00151709	Island	cg00054210	Island	cg00246932	S_Shelf
cg00159100	Island	cg00056066	N_Shore	cg00326958	Island
cg00234446	Island	cg00059399	Island	cg00371368	Island
cg00238897	Island	cg00064336	OpenSea	cg00399175	Island
cg00240432	Island	cg00074145	N_Shore	cg00421363	Island
cg00259618	Island	cg00076195	N_Shore	cg00447052	Island
cg00303982	Island	cg00084338	N_Shore	cg00455424	Island
cg00310968	Island	cg00085416	S_Shore	cg00462570	S_Shore
cg00339556	Island	cg00092518	Island	cg00469207	Island
cg00341742	S_Shore	cg00099427	Island	cg00488788	Island
cg00349607	N_Shore	cg00106345	S_Shore	cg00522056	Island
cg00353773	Island	cg00108351	N_Shore	cg00527440	Island
cg00381697	Island	cg00109302	OpenSea	cg00560482	Island
cg00389976	Island	cg00113675	Island	cg00563873	Island
cg00393798	Island	cg00123762	S_Shore	cg00573330	Island
cg00421139	Island	cg00147788	OpenSea	cg00662647	Island
cg00437985	Island	cg00166372	S_Shore	cg00665492	OpenSea
cg00450824	Island	cg00220677	OpenSea	cg00675569	Island
cg00466364	Island	cg00239353	OpenSea	cg00733780	Island
cg00473416	S_Shore	cg00247571	N_Shore	cg00748938	S_Shore
cg00498604	N_Shore	cg00253658	OpenSea	cg00783553	S_Shore
cg00519002	Island	cg00268185	Island	cg00795341	Island
cg00532157	Island	cg00300879	OpenSea	cg00817367	Island
cg00539386	Island	cg00318947	N_Shore	cg00829961	Island
cg00544449	Island	cg00325125	OpenSea	cg00944193	Island
cg00549463	Island	cg00326131	Island	cg00958884	Island
cg00567749	N_Shore	cg00334063	N_Shelf	cg00976453	Island
cg00590851	Island	cg00342358	N_Shore	cg00980978	Island
cg00594560	N_Shore	cg00343633	Island	cg01005968	N_Shore
cg00627241	Island	cg00344445	OpenSea	cg01016662	Island
cg00630724	Island	cg00347563	Island	cg01020696	N_Shore
cg00648301	Island	cg00366413	OpenSea	cg01043019	Island
cg00651829	Island	cg00375146	Island	cg01072076	Island
cg00700007	Island	cg00377344	N_Shore	cg01139508	Island
cg00745399	Island	cg00386405	N_Shelf	cg01160882	S_Shore
cg00745555	Island	cg00400448	N_Shore	cg01216438	OpenSea
cg00745606	Island	cg00403251	N_Shore	cg01240444	Island
cg00757082	Island	cg00423153	S_Shore	cg01272707	Island
cg00757182	Island	cg00428457	OpenSea	cg01283417	Island
cg00765312	Island	cg00429497	S_Shore	cg01324372	Island
cg00778995	Island	cg00450784	N_Shore	cg01361351	Island
cg00794178	Island	cg00466136	S_Shore	cg01396065	S_Shore
cg00796360	Island	cg00470007	Island	cg01431993	OpenSea
cg00800229	OpenSea	cg00470044	OpenSea	cg01460276	Island
cg00802728	Island	cg00491255	Island	cg01477985	Island
cg00817100	Island	cg00492741	OpenSea	cg01504555	Island
cg00834400	N_Shore	cg00498591	Island	cg01514828	N_Shore
cg00846114	Island	cg00507154	Island	cg01545587	Island
cg00852549	Island	cg00596687	N_Shore	cg01548300	Island
cg00862116	S_Shore	cg00601450	S_Shore	cg01558923	S_Shore
cg00866976	Island	cg00604771	Island	cg01565320	Island
cg00875960	Island	cg00611789	OpenSea	cg01566592	Island
cg00896540	Island	cg00627029	S_Shore	cg01588438	Island
cg00906644	Island	cg00635674	S_Shore	cg01620580	Island
cg00910695	Island	cg00639615	N_Shore	cg01643123	OpenSea
cg00942551	Island	cg00650809	Island	cg01645295	Island
cg00948275	Island	cg00660167	N_Shore	cg01663603	Island
cg00955967	OpenSea	cg00667343	N_Shore	cg01708411	N_Shore
cg00964103	OpenSea	cg00673191	OpenSea	cg01764082	Island
cg00981837	Island	cg00683332	Island	cg01837657	Island
cg00987080	Island	cg00694520	N_Shore	cg01872216	Island
cg00987461	OpenSea	cg00697992	N_Shore	cg01873234	Island
cg00994693	Island	cg00722320	OpenSea	cg01878345	Island
cg00995327	Island	cg00735923	OpenSea	cg01893212	Island
cg01005439	N_Shore	cg00740389	N_Shore	cg01896761	Island
cg01035160	Island	cg00744866	OpenSea	cg01939274	Island
cg01044883	S_Shore	cg00755130	Island	cg01942863	Island
cg01086895	Island	cg00760729	OpenSea	cg01950845	Island
cg01088410	Island	cg00767000	OpenSea	cg01963134	Island
cg01098237	Island	cg00773902	Island	cg02002231	Island
cg01108392	Island	cg00793935	Island	cg02054792	Island
cg01141940	Island	cg00799658	Island	cg02073558	Island
cg01157070	S_Shelf	cg00831222	S_Shore	cg02099543	Island
cg01208908	N_Shore	cg00839579	OpenSea	cg02143877	Island
cg01244650	S_Shore	cg00891541	Island	cg02242344	N_Shore
cg01247522	Island	cg00907288	S_Shore	cg02305377	N_Shelf
cg01263292	Island	cg00914726	Island	cg02367850	Island
cg01268683	Island	cg00921973	S_Shore	cg02380334	Island
cg01283834	N_Shore	cg00922748	OpenSea	cg02397176	Island
cg01287514	S_Shore	cg00931644	S_Shore	cg02408775	Island
cg01291029	Island	cg00962755	S_Shore	cg02423318	Island
cg01344452	Island	cg00969119	S_Shore	cg02435495	Island
cg01367393	Island	cg01021196	OpenSea	cg02455397	Island
cg01389445	Island	cg01030534	N_Shelf	cg02466321	Island
cg01392544	Island	cg01038597	Island	cg02468050	Island
cg01398050	N_Shore	cg01053766	OpenSea	cg02500443	Island
cg01403948	S_Shore	cg01061391	N_Shore	cg02503981	N_Shore
cg01419567	Island	cg01065977	S_Shore	cg02511231	Island
cg01419831	Island	cg01068601	Island	cg02523844	Island
cg01445809	Island	cg01076874	Island	cg02526522	Island
cg01446950	N_Shore	cg01089914	N_Shore	cg02527669	Island
cg01450642	Island	cg01119686	OpenSea	cg02534163	OpenSea
cg01454215	Island	cg01137401	N_Shore	cg02574502	Island
cg01456571	Island	cg01141339	S_Shore	cg02585459	Island
cg01458228	Island	cg01178624	Island	cg02603128	Island
cg01466678	Island	cg01178971	N_Shore	cg02636041	Island
cg01501819	S_Shore	cg01180479	Island	cg02650317	Island
cg01503348	S_Shore	cg01192077	N_Shore	cg02653559	N_Shore
cg01508023	Island	cg01194073	Island	cg02679809	Island
cg01535733	Island	cg01208614	S_Shore	cg02685016	Island
cg01536987	Island	cg01227537	Island	cg02687055	Island
cg01539036	Island	cg01232511	Island	cg02709432	OpenSea
cg01543173	Island	cg01235820	Island	cg02711647	Island
cg01546568	S_Shore	cg01239735	Island	cg02757194	Island
cg01557547	Island	cg01244270	S_Shore	cg02782369	Island
cg01559617	Island	cg01249360	Island	cg02841482	OpenSea
cg01561916	Island	cg01252526	N_Shore	cg02856953	Island
cg01562349	Island	cg01268824	S_Shore	cg02864844	Island
cg01563031	Island	cg01298678	N_Shore	cg02878891	Island
cg01563704	N_Shore	cg01307130	N_Shelf	cg02879662	Island
cg01576677	Island	cg01309213	N_Shore	cg02893180	Island
cg01579289	Island	cg01331772	OpenSea	cg02899346	N_Shore
cg01582473	Island	cg01341751	Island	cg02909711	OpenSea
cg01588748	OpenSea	cg01361068	N_Shore	cg02970696	Island
cg01615880	OpenSea	cg01390574	N_Shore	cg02979001	Island
cg01616178	Island	cg01394199	Island	cg02989521	Island
cg01649597	Island	cg01405445	Island	cg03017520	Island
cg01653005	Island	cg01408860	OpenSea	cg03037150	Island
cg01654862	Island	cg01414268	Island	cg03048083	Island
cg01663018	Island	cg01419136	OpenSea	cg03048314	Island
cg01676105	Island	cg01420688	N_Shore	cg03061682	Island
cg01692340	Island	cg01422262	N_Shore	cg03134157	Island
cg01742897	Island	cg01438056	N_Shelf	cg03152033	N_Shore
cg01756288	Island	cg01501896	Island	cg03205584	OpenSea
cg01762070	Island	cg01515508	S_Shelf	cg03257575	Island
cg01773059	Island	cg01517680	Island	cg03315869	Island
cg01791874	Island	cg01518607	OpenSea	cg03321592	Island
cg01804570	Island	cg01540102	OpenSea	cg03323292	Island
cg01805540	Island	cg01543184	S_Shore	cg03324821	Island
cg01805574	OpenSea	cg01562537	OpenSea	cg03351460	Island
cg01806520	Island	cg01569664	N_Shore	cg03394150	Island
cg01807377	Island	cg01571001	Island	cg03414318	Island
cg01808545	Island	cg01592687	N_Shore	cg03453917	Island
cg01814945	Island	cg01594538	OpenSea	cg03475182	N_Shore
cg01857475	N_Shore	cg01610165	OpenSea	cg03514404	N_Shelf
cg01869243	Island	cg01677628	OpenSea	cg03648334	Island
cg01886957	Island	cg01699740	OpenSea	cg03650674	Island
cg01894048	Island	cg01715266	Island	cg03654735	Island
cg01897797	OpenSea	cg01723606	Island	cg03657573	Island
cg01901107	Island	cg01723706	OpenSea	cg03735888	Island
cg01912921	Island	cg01735384	Island	cg03763873	N_Shore
cg01913970	Island	cg01744412	OpenSea	cg03774803	Island
cg01930417	Island	cg01749491	N_Shore	cg03875156	Island
cg01940855	Island	cg01749702	OpenSea	cg03934926	Island
cg01952234	Island	cg01754267	N_Shore	cg03958798	Island
cg01971137	Island	cg01754525	Island	cg03976877	Island
cg01978558	Island	cg01764252	OpenSea	cg03989125	Island
cg01984858	Island	cg01764713	S_Shore	cg04014576	Island
cg01995480	Island	cg01776278	S_Shore	cg04034767	Island
cg02006257	Island	cg01793449	Island	cg04048250	Island
cg02029926	N_Shore	cg01799671	OpenSea	cg04056343	OpenSea
cg02031245	Island	cg01825295	S_Shore	cg04066019	Island
cg02032606	Island	cg01850889	OpenSea	cg04110601	Island
cg02032778	OpenSea	cg01851874	OpenSea	cg04112961	Island
cg02033258	Island	cg01883635	S_Shelf	cg04125371	Island
cg02038168	Island	cg01901262	Island	cg04132199	Island
cg02062409	Island	cg01923252	N_Shore	cg04178858	Island
cg02074591	Island	cg01964852	Island	cg04204831	Island
cg02079933	Island	cg01971181	N_Shore	cg04294888	OpenSea
cg02096396	Island	cg01973695	Island	cg04342955	Island
cg02120582	Island	cg01974478	OpenSea	cg04353095	Island
cg02126753	OpenSea	cg01977762	N_Shore	cg04361551	Island
cg02132470	Island	cg01995067	N_Shore	cg04412646	N_Shore
cg02139871	S_Shore	cg01997813	Island	cg04434593	N_Shore
cg02152120	Island	cg02000808	S_Shore	cg04455164	Island
cg02156680	OpenSea	cg02008651	N_Shore	cg04460984	Island
cg02168857	Island	cg02027945	Island	cg04462627	Island
cg02169734	Island	cg02030008	Island	cg04480386	OpenSea
cg02173749	Island	cg02058408	Island	cg04508482	Island
cg02192967	Island	cg02064499	N_Shore	cg04515001	Island
cg02215070	Island	cg02074956	N_Shore	cg04528060	Island
cg02221866	Island	cg02081006	N_Shore	cg04582364	S_Shore
cg02224864	S_Shore	cg02081701	N_Shore	cg04689080	Island
cg02229993	Island	cg02085507	N_Shore	cg04700283	Island
cg02230017	Island	cg02090033	OpenSea	cg04710402	Island
cg02241363	Island	cg02091185	N_Shore	cg04747226	Island
cg02243714	N_Shore	cg02095290	OpenSea	cg04780572	N_Shore
cg02246190	OpenSea	cg02099390	OpenSea	cg04807470	Island
cg02266348	Island	cg02104434	Island	cg04812475	Island
cg02270183	Island	cg02112154	N_Shore	cg04884011	Island
cg02273617	Island	cg02156899	Island	cg04904331	Island
cg02279670	Island	cg02174092	Island	cg04907523	Island
cg02283366	Island	cg02204637	N_Shore	cg04920527	N_Shelf
cg02300216	Island	cg02218200	N_Shore	cg04996219	Island
cg02302582	N_Shore	cg02226645	S_Shore	cg05035456	Island
cg02312409	Island	cg02227919	N_Shore	cg05046525	Island
cg02316216	OpenSea	cg02236650	N_Shore	cg05062612	Island
cg02320454	Island	cg02245004	Island	cg05106294	S_Shore
cg02340053	Island	cg02245020	N_Shore	cg05143123	Island
cg02352723	Island	cg02246055	Island	cg05241924	S_Shore
cg02370417	Island	cg02247178	OpenSea	cg05283542	OpenSea
cg02383130	Island	cg02248486	Island	cg05286653	Island
cg02383154	S_Shore	cg02253760	Island	cg05302386	Island
cg02396496	Island	cg02254461	S_Shore	cg05347845	Island
cg02403395	OpenSea	cg02256049	S_Shore	cg05347878	Island
cg02434443	Island	cg02262187	Island	cg05377226	Island
cg02471132	Island	cg02286008	N_Shore	cg05452524	Island
cg02474799	OpenSea	cg02286602	Island	cg05473804	Island
cg02483484	Island	cg02304584	Island	cg05492660	Island
cg02496256	N_Shore	cg02313554	N_Shore	cg05494604	Island
cg02503159	OpenSea	cg02343823	Island	cg05497345	Island
cg02512920	N_Shore	cg02344497	OpenSea	cg05527869	Island
cg02515468	Island	cg02344527	OpenSea	cg05529816	Island
cg02532538	Island	cg02346342	OpenSea	cg05555207	Island
cg02539855	Island	cg02383368	N_Shore	cg05621343	Island
cg02547269	Island	cg02391713	Island	cg05647859	S_Shore
cg02572463	OpenSea	cg02401399	Island	cg05648010	Island
cg02574509	Island	cg02413187	S_Shore	cg05659097	S_Shore
cg02575948	Island	cg02415779	N_Shelf	cg05719164	Island
cg02577046	S_Shore	cg02434059	N_Shore	cg05799507	Island
cg02594410	Island	cg02445968	OpenSea	cg05804220	Island
cg02602541	Island	cg02467990	Island	cg05905176	Island
cg02604524	Island	cg02471897	Island	cg06048524	Island
cg02609127	Island	cg02477603	OpenSea	cg06072021	Island
cg02626657	Island	cg02482001	OpenSea	cg06073449	Island
cg02647878	Island	cg02483735	OpenSea	cg06103031	Island
cg02658488	Island	cg02487233	S_Shore	cg06122148	Island
cg02661879	Island	cg02502704	N_Shelf	cg06143522	S_Shore
cg02662362	Island	cg02553486	S_Shore	cg06204735	Island
cg02664812	Island	cg02555772	N_Shore	cg06299307	OpenSea
cg02667667	S_Shelf	cg02556436	N_Shelf	cg06385187	Island
cg02704535	Island	cg02577267	Island	cg06401021	Island
cg02709205	Island	cg02578944	Island	cg06404175	Island
cg02711801	Island	cg02587648	N_Shore	cg06409153	S_Shore
cg02725055	Island	cg02592271	Island	cg06443533	Island
cg02727444	Island	cg02597299	Island	cg06460869	N_Shore
cg02732804	Island	cg02598441	Island	cg06463958	Island
cg02737782	Island	cg02606058	Island	cg06546806	Island
cg02741216	Island	cg02607059	S_Shelf	cg06699564	N_Shore
cg02741521	Island	cg02610064	N_Shelf	cg06864047	Island
cg02756106	Island	cg02616769	OpenSea	cg06924241	S_Shore
cg02774186	Island	cg02623200	N_Shore	cg06926782	S_Shore
cg02781060	Island	cg02637537	OpenSea	cg06943420	Island
cg02788400	Island	cg02639108	Island	cg06976250	Island
cg02797548	Island	cg02657865	OpenSea	cg06980654	Island
cg02855409	OpenSea	cg02670123	OpenSea	cg06993118	Island
cg02874942	Island	cg02684104	OpenSea	cg06993703	Island
cg02882448	Island	cg02692313	Island	cg06998282	OpenSea
cg02884176	Island	cg02693607	S_Shore	cg07028821	Island
cg02899206	Island	cg02710296	Island	cg07054208	N_Shore
cg02907374	Island	cg02722214	Island	cg07064197	Island
cg02916312	Island	cg02722596	N_Shore	cg07087293	Island
cg02918054	Island	cg02757970	Island	cg07091412	Island
cg02925162	Island	cg02769477	OpenSea	cg07193766	Island
cg02928644	OpenSea	cg02773086	N_Shore	cg07195011	Island
cg02935154	Island	cg02797871	Island	cg07198194	Island
cg02939019	Island	cg02803819	N_Shelf	cg07229186	Island
cg02946934	Island	cg02829743	Island	cg07243941	S_Shore
cg02954735	Island	cg02837536	Island	cg07254054	Island
cg02955631	Island	cg02852670	Island	cg07258916	Island
cg02978421	Island	cg02855836	Island	cg07302069	Island
cg03009871	N_Shore	cg02918903	OpenSea	cg07346310	S_Shore
cg03057213	OpenSea	cg02921122	Island	cg07352438	Island
cg03059131	Island	cg02922913	Island	cg07355841	Island
cg03060201	Island	cg02930239	Island	cg07393736	Island
cg03072621	Island	cg02940147	S_Shore	cg07424592	Island
cg03091337	Island	cg02948862	S_Shore	cg07469637	Island
cg03102879	Island	cg02956248	N_Shore	cg07528613	Island
cg03110368	S_Shore	cg02961004	N_Shore	cg07559273	Island
cg03110382	Island	cg02964065	Island	cg07561017	Island
cg03132773	Island	cg02966153	Island	cg07576142	Island
cg03146993	Island	cg02969141	OpenSea	cg07663789	Island
cg03153658	Island	cg02991469	N_Shore	cg07687766	Island
cg03160883	Island	cg03009240	S_Shore	cg07690181	Island
cg03168582	Island	cg03014326	S_Shore	cg07700514	S_Shelf
cg03198578	S_Shore	cg03018058	N_Shore	cg07708622	Island
cg03203223	Island	cg03030717	N_Shore	cg07790615	Island
cg03207574	Island	cg03048654	N_Shore	cg07791427	Island
cg03220633	S_Shore	cg03051116	N_Shore	cg07821427	Island
cg03225817	Island	cg03064067	S_Shore	cg07834955	Island
cg03239178	N_Shore	cg03065447	N_Shore	cg07882671	Island
cg03257341	Island	cg03078486	Island	cg07892785	Island
cg03259494	Island	cg03125498	N_Shore	cg07895437	Island
cg03278146	Island	cg03126579	Island	cg07897248	N_Shore
cg03280624	Island	cg03126946	OpenSea	cg07914084	Island
cg03314195	Island	cg03144232	OpenSea	cg07923233	Island
cg03336086	Island	cg03158310	N_Shore	cg07961887	Island
cg03339065	Island	cg03159396	N_Shore	cg08032135	Island
cg03352287	Island	cg03168029	N_Shore	cg08042316	Island
cg03354113	Island	cg03184290	S_Shore	cg08049640	Island
cg03358769	Island	cg03190219	Island	cg08073882	Island
cg03363248	Island	cg03225210	N_Shelf	cg08081156	Island
cg03397575	OpenSea	cg03229627	N_Shore	cg08158408	Island
cg03433642	Island	cg03234702	Island	cg08161922	S_Shore
cg03443751	Island	cg03248761	N_Shore	cg08162372	Island
cg03456968	Island	cg03260530	N_Shore	cg08173692	Island
cg03460682	N_Shore	cg03277049	Island	cg08189989	Island
cg03469521	Island	cg03291607	N_Shore	cg08207377	Island
cg03478249	S_Shore	cg03301579	N_Shore	cg08236767	Island
cg03478689	Island	cg03308399	Island	cg08258259	Island
cg03506033	Island	cg03309253	Island	cg08302913	Island
cg03533005	Island	cg03310937	OpenSea	cg08320659	OpenSea
cg03539016	OpenSea	cg03323067	OpenSea	cg08348496	Island
cg03550205	Island	cg03338924	Island	cg08371772	Island
cg03556653	OpenSea	cg03339668	Island	cg08377924	N_Shore
cg03561455	Island	cg03349020	Island	cg08421126	Island
cg03571927	Island	cg03356595	Island	cg08447324	Island
cg03577655	Island	cg03405909	N_Shore	cg08497487	N_Shore
cg03580297	N_Shore	cg03415617	OpenSea	cg08535600	Island
cg03603951	Island	cg03419646	Island	cg08551725	Island
cg03607359	Island	cg03434384	OpenSea	cg08568720	Island
cg03612722	Island	cg03446244	OpenSea	cg08587775	Island
cg03614513	Island	cg03453916	OpenSea	cg08597761	Island
cg03625676	Island	cg03457729	N_Shore	cg08598483	Island
cg03637878	N_Shore	cg03465028	OpenSea	cg08630279	Island
cg03697024	S_Shore	cg03470772	N_Shore	cg08650910	Island
cg03698393	Island	cg03479211	OpenSea	cg08750951	Island
cg03711182	Island	cg03480346	N_Shore	cg08769966	Island
cg03718824	Island	cg03485172	S_Shore	cg08848774	Island
cg03728046	Island	cg03487027	Island	cg08854397	N_Shore
cg03734437	Island	cg03490759	Island	cg08858437	Island
cg03738352	Island	cg03547078	N_Shelf	cg08880849	Island
cg03740978	Island	cg03557857	N_Shore	cg08883223	N_Shore
cg03741406	Island	cg03560256	N_Shore	cg08901662	S_Shore
cg03779241	Island	cg03575969	N_Shore	cg08911275	Island
cg03780545	Island	cg03576469	S_Shore	cg08944430	S_Shore
cg03781505	Island	cg03577139	OpenSea	cg09008705	Island
cg03790804	Island	cg03596016	Island	cg09019329	N_Shore
cg03801902	Island	cg03598731	Island	cg09052083	Island
cg03813164	Island	cg03606898	Island	cg09101796	Island
cg03817911	Island	cg03610073	N_Shore	cg09161412	OpenSea
cg03847716	Island	cg03630821	Island	cg09167553	Island
cg03880173	Island	cg03631455	Island	cg09177106	Island
cg03884587	Island	cg03635578	S_Shelf	cg09224689	N_Shore
cg03908015	Island	cg03646916	Island	cg09234567	Island
cg03911502	Island	cg03650119	Island	cg09313053	Island
cg03921149	S_Shelf	cg03650946	N_Shore	cg09383816	Island
cg03940848	Island	cg03660901	OpenSea	cg09392940	Island
cg03965795	Island	cg03682112	Island	cg09396196	Island
cg03980541	Island	cg03707169	OpenSea	cg09489445	Island
cg04012266	Island	cg03709925	Island	cg09508770	Island
cg04012592	OpenSea	cg03711016	Island	cg09511846	N_Shore
cg04014062	Island	cg03713642	Island	cg09549240	N_Shore
cg04030615	Island	cg03714619	N_Shore	cg09571420	N_Shore
cg04067139	Island	cg03717503	OpenSea	cg09574088	Island
cg04088969	Island	cg03731268	Island	cg09576143	Island
cg04100696	Island	cg03736795	S_Shore	cg09591286	N_Shore
cg04108939	Island	cg03751967	Island	cg09615224	Island
cg04111064	Island	cg03760457	Island	cg09639725	Island
cg04138112	Island	cg03762694	S_Shore	cg09691340	Island
cg04156369	Island	cg03762994	Island	cg09695735	Island
cg04171539	N_Shore	cg03769939	N_Shore	cg09721739	S_Shore
cg04180299	Island	cg03780561	Island	cg09745440	Island
cg04184836	Island	cg03792162	S_Shore	cg09775582	Island
cg04203238	Island	cg03796943	OpenSea	cg09873164	Island
cg04210284	Island	cg03797115	S_Shore	cg09889291	Island
cg04246144	N_Shore	cg03819227	OpenSea	cg09893588	Island
cg04270347	S_Shore	cg03826594	Island	cg09896900	Island
cg04272632	Island	cg03853208	N_Shore	cg09918510	Island
cg04285033	Island	cg03860256	Island	cg09974990	Island
cg04292718	Island	cg03871124	Island	cg10002178	Island
cg04307561	Island	cg03873322	N_Shore	cg10034890	Island
cg04309093	Island	cg03908391	N_Shore	cg10043865	Island
cg04342821	Island	cg03925642	OpenSea	cg10086212	Island
cg04351049	Island	cg03930209	Island	cg10118210	Island
cg04408595	Island	cg03930313	Island	cg10118513	OpenSea
cg04415008	Island	cg03946671	Island	cg10147666	Island
cg04426311	Island	cg03954144	Island	cg10156366	Island
cg04428701	Island	cg03962794	OpenSea	cg10172415	Island
cg04430381	Island	cg03965496	Island	cg10185099	Island
cg04438814	Island	cg03969515	N_Shore	cg10259748	Island
cg04445512	Island	cg03971454	Island	cg10263682	Island
cg04452959	OpenSea	cg03982831	OpenSea	cg10272601	Island
cg04473302	Island	cg03984347	Island	cg10277927	Island
cg04481181	OpenSea	cg03989567	N_Shore	cg10356613	Island
cg04507515	Island	cg04003871	N_Shelf	cg10362542	Island
cg04515996	Island	cg04013024	N_Shore	cg10373003	OpenSea
cg04524120	Island	cg04016730	S_Shelf	cg10376408	Island
cg04532952	N_Shore	cg04021544	S_Shelf	cg10428938	Island
cg04546950	OpenSea	cg04027043	OpenSea	cg10471437	Island
cg04550737	Island	cg04027757	Island	cg10566121	Island
cg04561389	Island	cg04034967	OpenSea	cg10598353	Island
cg04568355	Island	cg04044188	OpenSea	cg10661191	OpenSea
cg04585612	Island	cg04055345	OpenSea	cg10678427	S_Shore
cg04617251	Island	cg04078410	S_Shore	cg10762626	S_Shore
cg04619603	N_Shore	cg04080282	Island	cg10868817	Island
cg04620091	Island	cg04089800	OpenSea	cg10876076	Island
cg04633225	Island	cg04109898	N_Shore	cg10955973	Island
cg04642923	Island	cg04111789	N_Shore	cg11014373	Island
cg04645342	N_Shore	cg04117801	N_Shelf	cg11017065	Island
cg04653710	Island	cg04123310	Island	cg11026555	Island
cg04674803	OpenSea	cg04134279	S_Shore	cg11083416	OpenSea
cg04685534	Island	cg04140663	Island	cg11104088	N_Shore
cg04718428	Island	cg04154027	OpenSea	cg11131532	Island
cg04741853	Island	cg04156293	N_Shore	cg11146691	OpenSea
cg04743961	Island	cg04187185	Island	cg11204212	Island
cg04770504	Island	cg04193835	Island	cg11267955	Island
cg04779720	Island	cg04194674	Island	cg11296498	N_Shore
cg04781584	Island	cg04197086	N_Shore	cg11334818	Island
cg04787432	Island	cg04206342	OpenSea	cg11355215	N_Shore
cg04790084	Island	cg04231050	OpenSea	cg11376305	Island
cg04796763	Island	cg04246763	Island	cg11409659	Island
cg04797725	Island	cg04249522	Island	cg11410023	Island
cg04823311	Island	cg04270401	N_Shore	cg11472279	Island
cg04825327	Island	cg04283162	Island	cg11521404	Island
cg04829853	Island	cg04295144	Island	cg11560280	S_Shore
cg04832466	Island	cg04300684	S_Shore	cg11571761	S_Shore
cg04846243	Island	cg04306069	OpenSea	cg11589139	N_Shore
cg04857420	Island	cg04308185	S_Shore	cg11590053	S_Shore
cg04858616	Island	cg04319873	S_Shore	cg11641791	OpenSea
cg04875084	Island	cg04335714	N_Shore	cg11651220	S_Shore
cg04879281	Island	cg04348643	OpenSea	cg11666087	Island
cg04885832	Island	cg04386400	Island	cg11851910	OpenSea
cg04890459	S_Shore	cg04387835	OpenSea	cg11856078	S_Shore
cg04933990	OpenSea	cg04395689	N_Shore	cg11876013	OpenSea
cg04954559	S_Shelf	cg04396312	Island	cg11903133	S_Shore
cg04959815	Island	cg04398581	S_Shore	cg11930554	Island
cg04976324	Island	cg04399751	N_Shore	cg11948055	OpenSea
cg04981088	Island	cg04401986	S_Shelf	cg11956953	Island
cg04981611	Island	cg04436207	N_Shore	cg11957331	Island
cg04982401	Island	cg04436554	N_Shore	cg11965976	Island
cg04994084	Island	cg04436994	Island	cg11976166	N_Shore
cg05006349	Island	cg04438074	Island	cg11986813	Island
cg05014211	Island	cg04444959	N_Shelf	cg11988964	N_Shore
cg05021846	N_Shore	cg04445427	OpenSea	cg11989330	Island
cg05028087	S_Shore	cg04484550	Island	cg12000995	Island
cg05034702	OpenSea	cg04503267	S_Shore	cg12001148	Island
cg05052633	Island	cg04517524	Island	cg12002589	Island
cg05053562	Island	cg04518342	Island	cg12035092	Island
cg05055766	Island	cg04520078	Island	cg12041848	Island
cg05059304	N_Shore	cg04527018	Island	cg12042659	Island
cg05127456	Island	cg04546205	OpenSea	cg12081946	S_Shore
cg05135569	Island	cg04556126	N_Shore	cg12146386	Island
cg05140069	Island	cg04557184	OpenSea	cg12178578	Island
cg05173737	Island	cg04567738	N_Shore	cg12187115	OpenSea
cg05176991	Island	cg04568492	Island	cg12187586	Island
cg05196820	Island	cg04569837	Island	cg12223582	Island
cg05214690	Island	cg04609245	Island	cg12307787	Island
cg05227549	Island	cg04638014	N_Shore	cg12343182	Island
cg05238517	N_Shore	cg04652943	N_Shore	cg12347429	Island
cg05239311	Island	cg04661001	N_Shelf	cg12356890	Island
cg05241355	N_Shore	cg04689061	N_Shore	cg12359697	Island
cg05248618	Island	cg04738692	Island	cg12367389	OpenSea
cg05251676	Island	cg04767756	OpenSea	cg12373208	Island
cg05258261	Island	cg04771100	Island	cg12373617	Island
cg05268203	N_Shore	cg04784499	N_Shore	cg12392473	Island
cg05281894	Island	cg04787024	Island	cg12473406	Island
cg05285902	Island	cg04789475	OpenSea	cg12476763	Island
cg05295038	Island	cg04800503	OpenSea	cg12500879	Island
cg05311412	Island	cg04804717	OpenSea	cg12516059	S_Shore
cg05329888	Island	cg04810284	OpenSea	cg12539796	Island
cg05347898	Island	cg04811592	OpenSea	cg12558012	Island
cg05372730	Island	cg04821993	OpenSea	cg12594569	Island
cg05374412	Island	cg04833731	OpenSea	cg12600174	Island
cg05384102	Island	cg04839131	Island	cg12624667	Island
cg05386493	Island	cg04844534	OpenSea	cg12629875	Island
cg05387519	Island	cg04858586	OpenSea	cg12664464	Island
cg05391318	Island	cg04863005	Island	cg12666279	Island
cg05412031	Island	cg04863892	Island	cg12749863	Island
cg05427966	Island	cg04865180	Island	cg12821278	Island
cg05446010	Island	cg04869122	OpenSea	cg12824796	Island
cg05470643	N_Shore	cg04876069	Island	cg12840719	N_Shore
cg05497616	Island	cg04880091	Island	cg12865552	Island
cg05500125	Island	cg04885068	Island	cg12883479	Island
cg05505803	Island	cg04896832	OpenSea	cg13021333	Island
cg05525743	Island	cg04927931	N_Shore	cg13052034	S_Shore
cg05542262	Island	cg04970570	OpenSea	cg13158894	Island
cg05562381	Island	cg04972745	Island	cg13180678	Island
cg05578989	Island	cg04974062	S_Shore	cg13186327	Island
cg05598562	Island	cg04990202	OpenSea	cg13213923	Island
cg05600740	Island	cg04994795	Island	cg13231700	N_Shore
cg05613116	Island	cg05026881	OpenSea	cg13238990	N_Shore
cg05617413	Island	cg05036212	N_Shore	cg13248778	OpenSea
cg05619587	N_Shore	cg05054998	Island	cg13265869	Island
cg05630016	Island	cg05064106	Island	cg13267264	Island
cg05633391	Island	cg05086567	Island	cg13323756	S_Shore
cg05639912	Island	cg05097643	Island	cg13334650	Island
cg05646373	Island	cg05127821	Island	cg13348059	Island
cg05663341	Island	cg05135549	Island	cg13354988	Island
cg05666120	Island	cg05169951	Island	cg13359948	Island
cg05667817	Island	cg05170706	OpenSea	cg13379827	Island
cg05684406	Island	cg05191879	N_Shore	cg13411784	Island
cg05707458	Island	cg05205842	OpenSea	cg13412498	Island
cg05720261	Island	cg05227215	S_Shore	cg13442432	Island
cg05720454	Island	cg05233373	S_Shore	cg13455704	Island
cg05728754	Island	cg05241828	N_Shore	cg13484549	Island
cg05739287	Island	cg05248067	N_Shore	cg13506653	N_Shore
cg05764240	Island	cg05263113	OpenSea	cg13509195	N_Shore
cg05801648	Island	cg05265884	S_Shore	cg13524302	Island
cg05807991	Island	cg05267427	OpenSea	cg13542090	Island
cg05824050	Island	cg05308495	Island	cg13564825	Island
cg05852231	OpenSea	cg05311410	Island	cg13603508	Island
cg05855588	Island	cg05335893	OpenSea	cg13605398	Island
cg05877648	Island	cg05351887	N_Shore	cg13613965	Island
cg05899726	Island	cg05369857	Island	cg13674271	Island
cg05916744	Island	cg05371552	Island	cg13685314	Island
cg05928649	Island	cg05372444	Island	cg13686615	Island
cg05933904	Island	cg05383931	OpenSea	cg13755070	Island
cg05937453	Island	cg05384123	OpenSea	cg13763061	N_Shore
cg05949903	Island	cg05385513	Island	cg13767940	Island
cg05950570	Island	cg05391892	Island	cg13782932	Island
cg05952494	N_Shore	cg05394800	N_Shore	cg13839457	Island
cg05958740	S_Shore	cg05395187	S_Shelf	cg13845982	Island
cg05963821	S_Shore	cg05401364	OpenSea	cg13874070	Island
cg05968145	Island	cg05404698	Island	cg13875120	Island
cg06002370	Island	cg05414908	Island	cg13879483	Island
cg06040206	Island	cg05422029	OpenSea	cg13913015	Island
cg06060191	N_Shore	cg05473536	S_Shore	cg13928709	Island
cg06065225	Island	cg05474726	S_Shore	cg13947995	Island
cg06090660	Island	cg05484949	OpenSea	cg13952656	Island
cg06110728	S_Shore	cg05517610	N_Shelf	cg13958426	Island
cg06123396	N_Shore	cg05534148	OpenSea	cg14000361	N_Shore
cg06125484	Island	cg05537653	Island	cg14018731	Island
cg06128448	OpenSea	cg05551068	N_Shore	cg14030882	OpenSea
cg06164660	Island	cg05557291	OpenSea	cg14036830	Island
cg06167664	Island	cg05572417	S_Shore	cg14066751	Island
cg06184669	N_Shore	cg05575921	N_Shore	cg14071579	OpenSea
cg06188229	Island	cg05582690	Island	cg14103680	Island
cg06190677	Island	cg05604079	Island	cg14117138	Island
cg06206471	Island	cg05633523	OpenSea	cg14123942	Island
cg06211837	Island	cg05634428	S_Shelf	cg14145801	N_Shore
cg06211893	Island	cg05638439	Island	cg14151783	Island
cg06213463	Island	cg05649108	Island	cg14159026	Island
cg06213964	Island	cg05650719	Island	cg14170313	Island
cg06226567	Island	cg05666820	Island	cg14192291	Island
cg06240450	Island	cg05697249	OpenSea	cg14207654	Island
cg06241292	Island	cg05705335	OpenSea	cg14249876	OpenSea
cg06241792	Island	cg05706898	Island	cg14250833	N_Shore
cg06244497	S_Shore	cg05720891	OpenSea	cg14251622	Island
cg06253058	Island	cg05745631	Island	cg14252279	Island
cg06270244	Island	cg05750047	OpenSea	cg14252602	Island
cg06285925	Island	cg05758861	Island	cg14315558	Island
cg06298519	Island	cg05766510	Island	cg14348397	S_Shore
cg06313119	Island	cg05821046	S_Shore	cg14359824	OpenSea
cg06319822	Island	cg05828191	S_Shore	cg14362312	Island
cg06338421	Island	cg05835105	Island	cg14367995	S_Shore
cg06338562	Island	cg05845376	Island	cg14416311	Island
cg06341513	Island	cg05845757	Island	cg14421860	Island
cg06353127	OpenSea	cg05864326	S_Shore	cg14453201	Island
cg06374165	OpenSea	cg05882699	Island	cg14482902	Island
cg06377278	Island	cg05896468	S_Shore	cg14491820	Island
cg06429617	Island	cg05897163	N_Shore	cg14499413	OpenSea
cg06451739	OpenSea	cg05901579	Island	cg14520424	Island
cg06458554	Island	cg05920961	Island	cg14530233	Island
cg06479755	Island	cg05923197	Island	cg14592474	N_Shore
cg06480736	Island	cg05924254	Island	cg14595003	Island
cg06484415	N_Shore	cg05933736	OpenSea	cg14603620	Island
cg06488775	Island	cg05934682	S_Shore	cg14649650	Island
cg06501832	N_Shore	cg05950755	Island	cg14650610	Island
cg06503907	N_Shore	cg06002638	N_Shore	cg14663510	Island
cg06528584	N_Shore	cg06021990	OpenSea	cg14765646	Island
cg06530490	Island	cg06025456	N_Shore	cg14776321	OpenSea
cg06535115	Island	cg06033579	OpenSea	cg14794428	N_Shore
cg06537680	Island	cg06048910	S_Shore	cg14839323	Island
cg06537894	Island	cg06088745	N_Shore	cg14852134	Island
cg06557057	Island	cg06120945	N_Shore	cg14866200	Island
cg06560887	Island	cg06122871	S_Shelf	cg14898260	Island
cg06570167	Island	cg06141025	OpenSea	cg14936968	Island
cg06576393	Island	cg06158111	N_Shelf	cg14996783	Island
cg06588645	Island	cg06173536	Island	cg15017004	Island
cg06593050	N_Shore	cg06173663	OpenSea	cg15026277	Island
cg06613095	Island	cg06206801	S_Shore	cg15045802	Island
cg06617341	Island	cg06211550	N_Shelf	cg15048660	Island
cg06641415	OpenSea	cg06215107	Island	cg15071854	Island
cg06649048	N_Shelf	cg06221449	Island	cg15093079	Island
cg06653045	Island	cg06226724	OpenSea	cg15100100	N_Shore
cg06664085	Island	cg06238004	N_Shore	cg15139588	Island
cg06668300	Island	cg06242102	Island	cg15160198	Island
cg06679347	Island	cg06246357	Island	cg15162392	Island
cg06711831	Island	cg06248767	OpenSea	cg15198101	Island
cg06715976	Island	cg06262280	OpenSea	cg15201536	Island
cg06716684	N_Shore	cg06299284	Island	cg15205435	Island
cg06721528	Island	cg06303238	Island	cg15344220	Island
cg06740629	Island	cg06359703	Island	cg15507776	Island
cg06740710	Island	cg06363129	OpenSea	cg15602740	Island
cg06744545	Island	cg06365976	OpenSea	cg15649852	S_Shore
cg06744574	N_Shore	cg06367311	Island	cg15654121	Island
cg06747432	Island	cg06387669	OpenSea	cg15658945	Island
cg06749789	Island	cg06392574	OpenSea	cg15674193	Island
cg06761921	Island	cg06419846	Island	cg15679813	Island
cg06765552	Island	cg06420834	Island	cg15690342	Island
cg06775930	Island	cg06421774	OpenSea	cg15711268	Island
cg06795971	N_Shore	cg06423357	Island	cg15778054	OpenSea
cg06804312	OpenSea	cg06428620	N_Shore	cg15778745	Island
cg06816106	Island	cg06437740	S_Shore	cg15825786	Island
cg06820586	Island	cg06441150	N_Shore	cg15892785	Island
cg06827247	Island	cg06458557	S_Shelf	cg15931205	Island
cg06839900	Island	cg06460587	Island	cg15932013	Island
cg06864853	Island	cg06466508	OpenSea	cg15994026	Island
cg06881310	OpenSea	cg06471596	OpenSea	cg16005540	Island
cg06893138	Island	cg06483432	N_Shore	cg16108059	S_Shore
cg06899755	Island	cg06484146	S_Shore	cg16114434	Island
cg06903384	Island	cg06489606	S_Shore	cg16126280	Island
cg06903569	OpenSea	cg06494642	Island	cg16171526	Island
cg06911121	Island	cg06500337	Island	cg16208084	Island
cg06914015	S_Shore	cg06532268	Island	cg16281276	Island
cg06931615	OpenSea	cg06546677	OpenSea	cg16423505	Island
cg06945523	Island	cg06553058	OpenSea	cg16448058	N_Shelf
cg06953252	Island	cg06554744	Island	cg16459349	Island
cg06960562	S_Shore	cg06555959	Island	cg16476975	Island
cg06980169	Island	cg06568438	OpenSea	cg16488737	Island
cg06997381	Island	cg06573787	OpenSea	cg16535717	Island
cg07003920	Island	cg06574716	OpenSea	cg16556906	Island
cg07017374	Island	cg06582782	OpenSea	cg16616521	Island
cg07025949	Island	cg06588556	Island	cg16620382	Island
cg07027116	Island	cg06596943	OpenSea	cg16633901	Island
cg07034660	N_Shore	cg06607764	OpenSea	cg16650529	Island
cg07035145	Island	cg06627334	OpenSea	cg16650717	Island
cg07035503	Island	cg06633438	Island	cg16658931	Island
cg07039180	Island	cg06644998	OpenSea	cg16769152	OpenSea
cg07052390	Island	cg06679334	OpenSea	cg16801887	Island
cg07068756	Island	cg06693983	Island	cg16844875	Island
cg07070039	S_Shore	cg06700877	N_Shore	cg16919517	Island
cg07098902	Island	cg06728252	Island	cg16999254	OpenSea
cg07117674	Island	cg06729532	Island	cg17016394	Island
cg07122245	Island	cg06744585	Island	cg17025835	Island
cg07139301	Island	cg06750897	Island	cg17054969	Island
cg07143532	Island	cg06796779	N_Shore	cg17064051	Island
cg07160574	S_Shore	cg06797617	N_Shore	cg17073273	Island
cg07167168	Island	cg06814287	N_Shore	cg17129986	Island
cg07175507	Island	cg06815715	OpenSea	cg17160382	OpenSea
cg07201456	Island	cg06829681	OpenSea	cg17164063	OpenSea
cg07204255	Island	cg06833110	Island	cg17172980	Island
cg07213036	Island	cg06837799	N_Shore	cg17199320	Island
cg07245225	Island	cg06870213	S_Shore	cg17218045	N_Shore
cg07249459	Island	cg06888460	Island	cg17267805	Island
cg07276415	Island	cg06904356	N_Shore	cg17297071	Island
cg07283114	Island	cg06908244	Island	cg17300544	Island
cg07303912	Island	cg06911613	S_Shore	cg17382198	Island
cg07311313	Island	cg06911753	Island	cg17385936	Island
cg07330230	S_Shore	cg06925984	Island	cg17395064	Island
cg07352345	Island	cg06941630	OpenSea	cg17470837	Island
cg07372602	Island	cg06948492	S_Shore	cg17483297	N_Shore
cg07398614	Island	cg06962918	S_Shore	cg17494781	Island
cg07399369	Island	cg07009504	N_Shore	cg17498803	Island
cg07406897	Island	cg07013148	OpenSea	cg17510056	Island
cg07410872	Island	cg07018389	N_Shore	cg17525428	N_Shore
cg07413251	Island	cg07034255	OpenSea	cg17641861	Island
cg07434402	OpenSea	cg07071491	OpenSea	cg17641904	Island
cg07449069	Island	cg07113199	S_Shore	cg17721710	Island
cg07451080	Island	cg07118895	OpenSea	cg17737967	Island
cg07475885	N_Shore	cg07120369	S_Shore	cg17810609	N_Shore
cg07475973	Island	cg07123182	S_Shore	cg17859110	Island
cg07478641	Island	cg07124687	Island	cg17926950	Island
cg07479670	Island	cg07130150	S_Shore	cg17973164	Island
cg07493516	N_Shore	cg07136998	Island	cg18002909	Island
cg07499241	S_Shore	cg07141605	OpenSea	cg18065361	Island
cg07523553	Island	cg07143470	N_Shore	cg18116154	Island
cg07526042	Island	cg07168142	Island	cg18129748	Island
cg07536502	OpenSea	cg07171527	Island	cg18154014	Island
cg07548607	Island	cg07173275	Island	cg18222083	Island
cg07551545	Island	cg07192718	N_Shore	cg18264638	Island
cg07553626	Island	cg07210840	Island	cg18319799	Island
cg07570142	Island	cg07211212	N_Shore	cg18323466	Island
cg07578695	Island	cg07215693	Island	cg18361093	Island
cg07600871	Island	cg07222505	N_Shore	cg18429863	Island
cg07607126	Island	cg07228241	S_Shore	cg18443378	Island
cg07636178	N_Shore	cg07241573	N_Shore	cg18447772	Island
cg07641160	Island	cg07241660	S_Shore	cg18454288	Island
cg07650252	Island	cg07242540	Island	cg18543270	N_Shore
cg07671805	Island	cg07250758	OpenSea	cg18558647	Island
cg07673133	Island	cg07278425	S_Shore	cg18559739	Island
cg07681728	Island	cg07342322	OpenSea	cg18560328	Island
cg07686635	Island	cg07350977	OpenSea	cg18582180	Island
cg07701018	Island	cg07371589	Island	cg18672939	Island
cg07701237	Island	cg07376381	Island	cg18683604	Island
cg07710481	N_Shore	cg07382435	N_Shore	cg18685408	Island
cg07716663	N_Shore	cg07387286	OpenSea	cg18693395	Island
cg07746323	Island	cg07395354	OpenSea	cg18740893	Island
cg07748540	Island	cg07406191	N_Shelf	cg18760837	OpenSea
cg07763047	Island	cg07411620	N_Shore	cg18804615	Island
cg07777694	S_Shelf	cg07416664	Island	cg18835517	S_Shore
cg07781162	Island	cg07455757	N_Shore	cg18924324	S_Shore
cg07791578	Island	cg07486199	Island	cg18945842	Island
cg07813249	Island	cg07489502	Island	cg18983604	Island
cg07829842	S_Shelf	cg07501988	N_Shore	cg19031575	N_Shore
cg07832473	Island	cg07505018	N_Shore	cg19053239	N_Shore
cg07838603	OpenSea	cg07512814	S_Shore	cg19074340	Island
cg07844931	Island	cg07515422	N_Shelf	cg19113326	Island
cg07846311	Island	cg07519235	Island	cg19166660	Island
cg07852757	Island	cg07522913	Island	cg19178853	Island
cg07857251	Island	cg07523043	OpenSea	cg19254906	S_Shore
cg07875385	OpenSea	cg07544796	OpenSea	cg19310908	Island
cg07875430	Island	cg07570470	Island	cg19320816	OpenSea
cg07919108	Island	cg07581811	OpenSea	cg19478500	S_Shore
cg07930469	Island	cg07582923	N_Shore	cg19489174	Island
cg07952047	Island	cg07584855	Island	cg19509715	Island
cg07955995	Island	cg07592963	Island	cg19513834	Island
cg07963181	Island	cg07606234	Island	cg19526130	Island
cg07966910	Island	cg07613752	Island	cg19535896	Island
cg08001895	Island	cg07616394	S_Shore	cg19677203	Island
cg08003150	Island	cg07618048	Island	cg19696441	Island
cg08060454	Island	cg07630327	OpenSea	cg19725903	Island
cg08081805	Island	cg07679948	Island	cg19752627	Island
cg08090772	Island	cg07691152	S_Shelf	cg19786920	N_Shore
cg08102256	Island	cg07696699	Island	cg19809499	Island
cg08104202	Island	cg07723251	S_Shore	cg19832521	N_Shore
cg08105965	Island	cg07751331	S_Shore	cg19839798	Island
cg08136813	N_Shore	cg07753203	N_Shore	cg19884345	S_Shore
cg08153345	Island	cg07791011	N_Shore	cg19897330	Island
cg08169864	Island	cg07792478	Island	cg19898128	Island
cg08170869	N_Shore	cg07806674	Island	cg19904122	Island
cg08171206	Island	cg07811110	S_Shore	cg19907776	OpenSea
cg08190291	Island	cg07824824	Island	cg19935171	N_Shore
cg08194313	Island	cg07844977	Island	cg20011402	Island
cg08195943	Island	cg07855242	N_Shore	cg20129213	Island
cg08253296	Island	cg07856667	Island	cg20150591	Island
cg08268798	Island	cg07861448	S_Shore	cg20164887	Island
cg08274234	OpenSea	cg07863022	OpenSea	cg20168412	Island
cg08288406	Island	cg07894334	N_Shore	cg20183619	Island
cg08311610	Island	cg07911905	OpenSea	cg20255775	Island
cg08318212	Island	cg07917150	N_Shore	cg20265733	Island
cg08319991	Island	cg07936950	Island	cg20295442	Island
cg08322034	Island	cg07945221	OpenSea	cg20295992	Island
cg08343042	Island	cg07986239	Island	cg20371765	S_Shore
cg08343881	OpenSea	cg07991704	OpenSea	cg20415170	S_Shore
cg08346159	Island	cg07996594	Island	cg20434926	Island
cg08347183	Island	cg07997333	OpenSea	cg20492807	Island
cg08384637	Island	cg08008475	OpenSea	cg20506715	Island
cg08391415	Island	cg08019058	OpenSea	cg20532370	Island
cg08393070	Island	cg08040755	OpenSea	cg20540714	N_Shore
cg08406370	N_Shore	cg08044427	OpenSea	cg20566450	N_Shore
cg08413157	Island	cg08048268	Island	cg20568196	Island
cg08430489	Island	cg08050663	OpenSea	cg20597013	Island
cg08434234	Island	cg08126875	OpenSea	cg20601919	Island
cg08440556	N_Shore	cg08133486	N_Shore	cg20678442	Island
cg08452658	Island	cg08135406	OpenSea	cg20686479	S_Shore
cg08458292	Island	cg08143343	S_Shore	cg20716515	N_Shore
cg08473090	Island	cg08160224	OpenSea	cg20737185	Island
cg08476224	Island	cg08163199	Island	cg20740157	S_Shore
cg08480826	Island	cg08183724	S_Shore	cg20776829	Island
cg08492619	Island	cg08201451	OpenSea	cg20800509	Island
cg08495115	Island	cg08222513	OpenSea	cg20814095	Island
cg08512702	Island	cg08227526	N_Shore	cg20912169	Island
cg08519216	Island	cg08231870	Island	cg21001198	Island
cg08522426	N_Shelf	cg08253651	Island	cg21011827	Island
cg08535260	Island	cg08260052	Island	cg21026022	S_Shore
cg08540945	Island	cg08263750	OpenSea	cg21026663	Island
cg08575330	Island	cg08264805	N_Shore	cg21042456	Island
cg08576864	Island	cg08269974	Island	cg21063722	N_Shore
cg08581937	Island	cg08289130	S_Shore	cg21152690	S_Shore
cg08599259	Island	cg08290076	N_Shore	cg21211480	Island
cg08613597	N_Shore	cg08302650	Island	cg21218082	Island
cg08618802	Island	cg08304190	Island	cg21233003	Island
cg08619651	Island	cg08314208	Island	cg21255942	Island
cg08624680	N_Shore	cg08323957	OpenSea	cg21293611	Island
cg08625289	Island	cg08326019	Island	cg21322654	N_Shore
cg08625380	Island	cg08330247	OpenSea	cg21330423	Island
cg08631504	Island	cg08358803	N_Shore	cg21396456	Island
cg08635685	OpenSea	cg08360726	Island	cg21461649	OpenSea
cg08663159	S_Shore	cg08364561	N_Shore	cg21463763	Island
cg08673054	N_Shore	cg08374798	N_Shore	cg21479226	S_Shore
cg08675193	S_Shore	cg08379738	Island	cg21486470	Island
cg08684639	Island	cg08379987	OpenSea	cg21523564	Island
cg08700032	Island	cg08382226	Island	cg21555796	Island
cg08713212	Island	cg08393041	Island	cg21620246	Island
cg08729318	Island	cg08393317	Island	cg21621906	Island
cg08747377	Island	cg08415582	Island	cg21624902	Island
cg08774368	Island	cg08418111	OpenSea	cg21634064	Island
cg08788717	Island	cg08441803	OpenSea	cg21653184	Island
cg08805144	S_Shore	cg08445802	Island	cg21678312	OpenSea
cg08812555	Island	cg08452456	Island	cg21678445	Island
cg08814105	Island	cg08469215	Island	cg21764190	Island
cg08838671	Island	cg08481075	Island	cg21773872	Island
cg08876434	Island	cg08493959	S_Shore	cg21784036	N_Shore
cg08876441	OpenSea	cg08515989	Island	cg21868134	Island
cg08890418	Island	cg08516817	Island	cg21868774	Island
cg08933227	Island	cg08535474	OpenSea	cg21883802	Island
cg08967106	Island	cg08555866	Island	cg21938148	Island
cg08997628	Island	cg08572336	Island	cg22001496	Island
cg08999915	Island	cg08573435	OpenSea	cg22052659	Island
cg09008417	Island	cg08580014	Island	cg22054918	Island
cg09011742	Island	cg08584759	Island	cg22143569	Island
cg09017619	Island	cg08598221	S_Shore	cg22196952	Island
cg09020665	Island	cg08604097	N_Shore	cg22260952	S_Shore
cg09035284	Island	cg08605301	Island	cg22297146	Island
cg09049672	Island	cg08610862	S_Shore	cg22333214	S_Shore
cg09052453	Island	cg08611810	Island	cg22425474	Island
cg09056181	Island	cg08624648	Island	cg22455914	Island
cg09062550	Island	cg08637446	OpenSea	cg22471255	Island
cg09083627	Island	cg08657654	S_Shelf	cg22473620	Island
cg09085842	Island	cg08659179	OpenSea	cg22478210	N_Shore
cg09110402	Island	cg08662052	S_Shore	cg22488970	N_Shore
cg09112514	Island	cg08679971	N_Shore	cg22524657	Island
cg09118932	Island	cg08696165	S_Shore	cg22539069	N_Shore
cg09125430	OpenSea	cg08700707	OpenSea	cg22602002	Island
cg09150076	Island	cg08708961	OpenSea	cg22773661	Island
cg09150450	Island	cg08711175	S_Shelf	cg22774088	Island
cg09151979	Island	cg08714996	N_Shore	cg22779991	Island
cg09154978	Island	cg08721338	S_Shore	cg22794704	Island
cg09155997	Island	cg08727218	Island	cg22830113	Island
cg09166519	Island	cg08732352	S_Shore	cg22831607	Island
cg09219451	N_Shore	cg08754124	OpenSea	cg22847691	Island
cg09241022	Island	cg08756033	N_Shore	cg22863209	Island
cg09252495	Island	cg08767938	N_Shore	cg22876812	Island
cg09265529	Island	cg08775835	OpenSea	cg22991512	Island
cg09267217	Island	cg08777316	Island	cg23010538	OpenSea
cg09279949	Island	cg08786026	N_Shore	cg23057706	Island
cg09312564	Island	cg08791424	Island	cg23060872	Island
cg09327714	Island	cg08795640	N_Shore	cg23080354	Island
cg09359907	Island	cg08799305	OpenSea	cg23121993	Island
cg09360501	S_Shore	cg08801479	S_Shore	cg23142394	Island
cg09368936	Island	cg08806779	S_Shore	cg23152641	S_Shore
cg09405790	Island	cg08814405	N_Shore	cg23161999	N_Shore
cg09424526	Island	cg08830300	Island	cg23216292	OpenSea
cg09451960	OpenSea	cg08833636	Island	cg23219859	Island
cg09454560	Island	cg08850461	OpenSea	cg23243463	Island
cg09458272	OpenSea	cg08851727	S_Shore	cg23246885	Island
cg09461837	Island	cg08853572	S_Shore	cg23272632	Island
cg09462445	Island	cg08863830	OpenSea	cg23291534	Island
cg09463047	Island	cg08867825	OpenSea	cg23324048	Island
cg09464137	S_Shore	cg08886020	Island	cg23332582	Island
cg09480054	Island	cg08898155	Island	cg23357130	Island
cg09489306	Island	cg08900101	N_Shore	cg23384093	S_Shore
cg09491991	Island	cg08928753	Island	cg23460843	Island
cg09511914	Island	cg08971637	N_Shore	cg23543615	Island
cg09524455	Island	cg08973950	N_Shore	cg23563008	Island
cg09528825	Island	cg08979191	S_Shore	cg23624008	S_Shore
cg09559047	Island	cg08999742	N_Shelf	cg23748923	Island
cg09635053	Island	cg09013220	OpenSea	cg23782616	OpenSea
cg09638407	Island	cg09065876	Island	cg23782734	Island
cg09644722	Island	cg09106903	N_Shore	cg23833588	Island
cg09656848	Island	cg09117448	Island	cg23847109	Island
cg09689137	Island	cg09122035	S_Shore	cg23849078	Island
cg09693432	Island	cg09122096	OpenSea	cg23855505	S_Shore
cg09696939	N_Shore	cg09124496	OpenSea	cg23858040	Island
cg09736112	Island	cg09126559	S_Shore	cg23883409	Island
cg09740671	Island	cg09135656	N_Shore	cg23987444	Island
cg09745087	Island	cg09178190	N_Shore	cg23999695	Island
cg09753043	N_Shore	cg09180520	S_Shelf	cg24008544	Island
cg09768093	Island	cg09190051	Island	cg24119079	Island
cg09777525	S_Shore	cg09197112	Island	cg24131748	Island
cg09789590	Island	cg09234582	N_Shore	cg24152605	Island
cg09793584	Island	cg09251959	S_Shore	cg24155129	N_Shelf
cg09804380	Island	cg09257635	Island	cg24158187	Island
cg09809276	N_Shore	cg09265054	S_Shore	cg24158594	Island
cg09822538	N_Shore	cg09272923	OpenSea	cg24172269	Island
cg09823095	Island	cg09275704	Island	cg24182470	N_Shore
cg09835225	Island	cg09290705	N_Shore	cg24239148	Island
cg09848096	Island	cg09313482	OpenSea	cg24266670	Island
cg09929831	Island	cg09329079	N_Shore	cg24384244	Island
cg09952395	Island	cg09341793	Island	cg24434959	Island
cg09961645	OpenSea	cg09347176	OpenSea	cg24446548	Island
cg09979478	Island	cg09350411	N_Shore	cg24504927	OpenSea
cg09987011	Island	cg09355528	OpenSea	cg24519146	N_Shore
cg09998133	Island	cg09366730	Island	cg24530250	Island
cg10008589	Island	cg09366796	N_Shore	cg24563094	Island
cg10019132	N_Shore	cg09370594	Island	cg24565369	Island
cg10031614	Island	cg09374838	OpenSea	cg24595510	Island
cg10043037	S_Shore	cg09416188	OpenSea	cg24596998	N_Shore
cg10058464	Island	cg09417209	OpenSea	cg24690054	S_Shore
cg10061361	OpenSea	cg09417849	N_Shore	cg24761507	Island
cg10076031	S_Shore	cg09437479	OpenSea	cg24804517	Island
cg10089527	Island	cg09469667	Island	cg24859937	OpenSea
cg10091994	Island	cg09473826	N_Shore	cg24908814	Island
cg10096161	Island	cg09521623	OpenSea	cg24940138	Island
cg10096177	Island	cg09527126	OpenSea	cg25048344	Island
cg10140114	Island	cg09533178	S_Shore	cg25082959	Island
cg10147797	Island	cg09544050	Island	cg25145765	N_Shore
cg10155875	Island	cg09556826	Island	cg25158147	N_Shore
cg10164592	S_Shore	cg09557387	Island	cg25208017	Island
cg10171448	Island	cg09558034	N_Shore	cg25261228	Island
cg10178263	Island	cg09558850	S_Shore	cg25274503	Island
cg10179315	Island	cg09570348	N_Shore	cg25285794	Island
cg10179911	N_Shore	cg09577391	S_Shore	cg25347419	S_Shore
cg10188732	Island	cg09580336	N_Shore	cg25432975	Island
cg10192047	Island	cg09596958	N_Shore	cg25438963	Island
cg10200388	S_Shelf	cg09619624	Island	cg25446309	Island
cg10207218	Island	cg09624466	Island	cg25458175	Island
cg10223827	Island	cg09626894	OpenSea	cg25459558	Island
cg10229294	Island	cg09642408	OpenSea	cg25479788	Island
cg10249375	Island	cg09642740	Island	cg25485875	Island
cg10253929	Island	cg09655403	OpenSea	cg25500050	Island
cg10262387	Island	cg09657963	Island	cg25537217	Island
cg10273340	Island	cg09670128	Island	cg25566568	S_Shore
cg10285337	Island	cg09671258	Island	cg25570913	Island
cg10293925	Island	cg09687907	N_Shore	cg25577023	Island
cg10297491	Island	cg09698465	Island	cg25583174	Island
cg10305311	Island	cg09739413	Island	cg25594119	N_Shore
cg10316490	OpenSea	cg09748960	OpenSea	cg25670330	Island
cg10325600	Island	cg09753657	Island	cg25794823	OpenSea
cg10341154	Island	cg09758273	N_Shelf	cg25810484	S_Shore
cg10344081	Island	cg09780231	OpenSea	cg25813864	Island
cg10349065	Island	cg09782097	N_Shore	cg25830696	Island
cg10349436	Island	cg09791746	Island	cg25831075	OpenSea
cg10363246	Island	cg09798888	S_Shore	cg25902187	Island
cg10368447	Island	cg09799983	Island	cg25996119	Island
cg10377903	Island	cg09825979	Island	cg26001902	Island
cg10386016	S_Shore	cg09848508	Island	cg26065057	N_Shore
cg10416527	Island	cg09852127	N_Shore	cg26077100	Island
cg10426464	Island	cg09864185	N_Shore	cg26084529	Island
cg10437806	Island	cg09884423	N_Shore	cg26121591	Island
cg10446179	OpenSea	cg09910635	N_Shore	cg26122980	Island
cg10457056	Island	cg09919570	Island	cg26134895	Island
cg10461004	Island	cg09920172	Island	cg26210445	Island
cg10479082	Island	cg09935388	Island	cg26224671	Island
cg10480343	Island	cg09954698	N_Shore	cg26268701	Island
cg10485664	Island	cg09957864	N_Shore	cg26328510	Island
cg10498434	Island	cg09973986	S_Shelf	cg26342671	Island
cg10501128	Island	cg09982773	Island	cg26440289	Island
cg10507275	Island	cg09989847	OpenSea	cg26480862	OpenSea
cg10511249	Island	cg09997546	N_Shore	cg26483229	Island
cg10511618	Island	cg10002850	S_Shore	cg26583481	Island
cg10530851	Island	cg10013501	Island	cg26615127	Island
cg10548807	OpenSea	cg10038185	Island	cg26630735	Island
cg10555583	Island	cg10055501	N_Shore	cg26647332	N_Shore
cg10576051	Island	cg10068417	N_Shore	cg26654934	Island
cg10601616	Island	cg10084993	S_Shore	cg26661034	Island
cg10603183	Island	cg10090414	OpenSea	cg26675876	Island
cg10643691	OpenSea	cg10095954	Island	cg26734696	Island
cg10648670	S_Shore	cg10096100	OpenSea	cg26751972	Island
cg10659382	Island	cg10096929	Island	cg26831241	Island
cg10667877	Island	cg10107890	Island	cg26866482	N_Shore
cg10668399	Island	cg10122865	Island	cg26871372	Island
cg10694030	Island	cg10128806	N_Shore	cg26917673	Island
cg10715223	Island	cg10130564	OpenSea	cg27009208	Island
cg10717290	Island	cg10134527	Island	cg27014135	Island
cg10755058	Island	cg10134833	N_Shore	cg27016990	Island
cg10756127	S_Shore	cg10143811	OpenSea	cg27085741	Island
cg10775273	Island	cg10172584	Island	cg27107171	Island
cg10784386	Island	cg10182869	S_Shore	cg27122213	Island
cg10788735	Island	cg10197263	Island	cg27164797	S_Shore
cg10794285	Island	cg10218605	N_Shore	cg27205687	Island
cg10806140	Island	cg10224600	S_Shore	cg27279991	Island
cg10821115	Island	cg10225865	OpenSea	cg27299406	Island
cg10826197	S_Shore	cg10244364	OpenSea	cg27312388	OpenSea
cg10834205	N_Shore	cg10259889	Island	cg27341472	Island
cg10864074	Island	cg10286969	Island	cg27363327	Island
cg10864878	Island	cg10296799	OpenSea	cg27363829	OpenSea
cg10871779	Island	cg10299976	Island	cg27424995	Island
cg10881242	Island	cg10303842	OpenSea	cg27477067	S_Shore
cg10884052	Island	cg10304637	Island	cg27477373	Island
cg10886442	Island	cg10313047	OpenSea	cg27493151	S_Shore
cg10890233	Island	cg10317717	Island	cg27507687	Island
cg10896862	OpenSea	cg10320410	OpenSea	cg27513574	Island
cg10904986	Island	cg10329345	Island	cg27515369	Island
cg10927719	Island	cg10331073	Island	cg27555582	Island
cg10979880	Island	cg10334741	Island	cg27559661	N_Shore
cg11002404	Island	cg10350880	N_Shore	cg27591450	Island
cg11012584	Island	cg10357060	OpenSea	cg27606567	Island
cg11015038	Island	cg10359157	Island	cg27648738	Island
cg11018723	Island	cg10374084	Island
cg11027570	Island	cg10377582	S_Shore
cg11052780	Island	cg10381888	Island
cg11092616	S_Shore	cg10409981	Island
cg11098493	Island	cg10418578	N_Shelf
cg11099006	Island	cg10424417	S_Shelf
cg11108676	Island	cg10436410	N_Shore
cg11111132	Island	cg10439765	Island
cg11152364	Island	cg10440578	Island
cg11158057	N_Shore	cg10477592	S_Shore
cg11163975	Island	cg10493506	OpenSea
cg11167100	Island	cg10494684	N_Shore
cg11186405	Island	cg10494860	Island
cg11187796	Island	cg10505610	OpenSea
cg11198128	Island	cg10505973	Island
cg11213520	Island	cg10506844	Island
cg11242791	Island	cg10516993	Island
cg11250941	Island	cg10540364	Island
cg11253514	Island	cg10541864	Island
cg11256387	S_Shore	cg10551329	N_Shore
cg11262757	Island	cg10570241	Island
cg11270393	Island	cg10572274	N_Shore
cg11281641	Island	cg10574365	Island
cg11305677	N_Shore	cg10583651	OpenSea
cg11331678	Island	cg10592478	N_Shore
cg11334214	Island	cg10616216	Island
cg11338643	Island	cg10617784	Island
cg11361827	Island	cg10682957	OpenSea
cg11372090	Island	cg10708761	N_Shore
cg11398523	Island	cg10746936	Island
cg11400401	OpenSea	cg10747118	S_Shore
cg11412935	Island	cg10794257	N_Shore
cg11414560	Island	cg10811045	Island
cg11416076	OpenSea	cg10812186	Island
cg11430157	Island	cg10821226	Island
cg11437784	Island	cg10823804	OpenSea
cg11444704	Island	cg10825234	N_Shelf
cg11445123	Island	cg10828284	Island
cg11448068	Island	cg10831246	OpenSea
cg11454719	Island	cg10868156	Island
cg11492102	Island	cg10884288	N_Shore
cg11510060	Island	cg10903903	Island
cg11518359	Island	cg10927178	N_Shore
cg11525280	Island	cg10940462	Island
cg11527326	Island	cg10959198	Island
cg11540007	Island	cg10982443	Island
cg11564981	Island	cg11027217	Island
cg11569407	Island	cg11050612	N_Shore
cg11576176	Island	cg11062466	N_Shore
cg11599539	Island	cg11092487	Island
cg11610754	Island	cg11100804	S_Shelf
cg11628754	Island	cg11135108	OpenSea
cg11632238	Island	cg11145461	N_Shore
cg11638181	N_Shore	cg11162118	Island
cg11638200	Island	cg11174847	Island
cg11641611	Island	cg11196848	S_Shore
cg11660146	Island	cg11199639	OpenSea
cg11660826	Island	cg11203512	S_Shore
cg11672054	Island	cg11205981	Island
cg11677857	Island	cg11206167	Island
cg11679177	N_Shore	cg11211563	Island
cg11689813	Island	cg11212451	OpenSea
cg11694752	Island	cg11217960	OpenSea
cg11697111	Island	cg11224582	Island
cg11721803	Island	cg11229864	OpenSea
cg11724516	Island	cg11234637	Island
cg11737710	Island	cg11239720	OpenSea
cg11737742	Island	cg11309785	OpenSea
cg11747771	Island	cg11333459	Island
cg11755796	Island	cg11354105	Island
cg11767984	Island	cg11356571	Island
cg11775528	Island	cg11359133	N_Shore
cg11827837	Island	cg11365440	S_Shore
cg11840125	Island	cg11372436	OpenSea
cg11855325	Island	cg11385338	Island
cg11865553	OpenSea	cg11386098	OpenSea
cg11878069	Island	cg11409350	N_Shore
cg11889692	Island	cg11435506	Island
cg11897314	Island	cg11440009	OpenSea
cg11900861	Island	cg11505113	S_Shore
cg11901043	Island	cg11508406	Island
cg11931727	OpenSea	cg11510586	Island
cg11973177	Island	cg11513637	N_Shore
cg11982072	Island	cg11521079	S_Shore
cg12002303	Island	cg11523350	OpenSea
cg12003318	Island	cg11528849	OpenSea
cg12009023	N_Shore	cg11532302	Island
cg12022294	Island	cg11595575	N_Shore
cg12024969	Island	cg11598403	Island
cg12027636	S_Shore	cg11599864	OpenSea
cg12040830	Island	cg11606877	OpenSea
cg12041056	Island	cg11613741	OpenSea
cg12062819	Island	cg11635197	OpenSea
cg12092090	S_Shore	cg11668133	OpenSea
cg12112529	Island	cg11669285	Island
cg12120327	Island	cg11679871	OpenSea
cg12124386	OpenSea	cg11694519	OpenSea
cg12124922	Island	cg11704876	OpenSea
cg12146546	Island	cg11737172	S_Shore
cg12169365	N_Shore	cg11743675	OpenSea
cg12182991	Island	cg11747462	OpenSea
cg12205729	N_Shore	cg11793699	Island
cg12206423	S_Shore	cg11808677	N_Shore
cg12208258	Island	cg11827910	Island
cg12212555	Island	cg11828180	Island
cg12225910	Island	cg11843238	Island
cg12266953	Island	cg11845417	OpenSea
cg12276123	Island	cg11855615	S_Shelf
cg12279877	Island	cg11883836	Island
cg12286569	Island	cg11885357	N_Shore
cg12294121	N_Shore	cg11898646	N_Shore
cg12306213	Island	cg11903188	N_Shore
cg12314713	Island	cg11908057	S_Shore
cg12317601	Island	cg11914795	Island
cg12330330	Island	cg11948766	OpenSea
cg12352124	Island	cg11959694	N_Shore
cg12379940	Island	cg11962640	OpenSea
cg12379948	Island	cg11971771	Island
cg12382902	Island	cg11991617	OpenSea
cg12388309	Island	cg11994630	Island
cg12391352	Island	cg12003064	S_Shore
cg12391690	Island	cg12008047	Island
cg12392684	Island	cg12017745	Island
cg12435415	N_Shore	cg12018098	Island
cg12448161	Island	cg12033622	Island
cg12451869	Island	cg12036817	N_Shore
cg12467264	N_Shore	cg12047941	Island
cg12477716	Island	cg12052265	N_Shore
cg12479674	Island	cg12067522	S_Shore
cg12483801	Island	cg12102838	OpenSea
cg12505146	Island	cg12105941	OpenSea
cg12510028	S_Shore	cg12106855	N_Shore
cg12528713	Island	cg12116027	N_Shore
cg12538248	Island	cg12134633	OpenSea
cg12584684	S_Shore	cg12135344	Island
cg12595016	Island	cg12148647	Island
cg12646385	OpenSea	cg12176783	Island
cg12652174	Island	cg12180270	Island
cg12664209	Island	cg12186317	OpenSea
cg12691866	S_Shore	cg12199221	N_Shore
cg12704157	Island	cg12258179	Island
cg12740527	Island	cg12278705	N_Shore
cg12745764	N_Shore	cg12284789	Island
cg12755298	Island	cg12296772	Island
cg12758636	Island	cg12298268	Island
cg12769138	Island	cg12301695	OpenSea
cg12778215	Island	cg12305431	S_Shelf
cg12786945	Island	cg12309703	N_Shore
cg12825804	Island	cg12349884	N_Shore
cg12829717	Island	cg12374721	N_Shore
cg12845520	N_Shore	cg12380441	N_Shore
cg12855522	Island	cg12387154	S_Shore
cg12859211	Island	cg12408990	Island
cg12861945	Island	cg12417071	N_Shore
cg12869912	Island	cg12419685	Island
cg12874092	Island	cg12428514	OpenSea
cg12907983	Island	cg12436377	S_Shelf
cg12912737	Island	cg12451530	Island
cg12944197	Island	cg12468774	Island
cg12949975	Island	cg12472603	N_Shore
cg12950911	Island	cg12516359	N_Shore
cg12986271	Island	cg12560020	OpenSea
cg13004182	Island	cg12564567	Island
cg13042543	Island	cg12586386	N_Shore
cg13051071	Island	cg12599850	N_Shore
cg13137176	Island	cg12616097	Island
cg13142700	Island	cg12629325	Island
cg13161961	Island	cg12632411	Island
cg13168683	Island	cg12633154	Island
cg13207797	Island	cg12676534	S_Shore
cg13251269	OpenSea	cg12719030	OpenSea
cg13259296	Island	cg12727398	Island
cg13274107	Island	cg12732998	S_Shore
cg13281139	Island	cg12752420	OpenSea
cg13297865	Island	cg12754571	Island
cg13307451	Island	cg12812233	Island
cg13325154	Island	cg12825070	Island
cg13326227	Island	cg12843448	S_Shore
cg13338827	Island	cg12848808	N_Shore
cg13346013	Island	cg12850379	S_Shore
cg13349651	Island	cg12864235	OpenSea
cg13355047	Island	cg12864721	Island
cg13368756	Island	cg12868173	Island
cg13371788	Island	cg12883279	N_Shore
cg13382322	Island	cg12887985	S_Shelf
cg13383019	Island	cg12889810	OpenSea
cg13403586	Island	cg12893736	S_Shore
cg13404421	Island	cg12905085	Island
cg13405332	Island	cg12917153	Island
cg13409645	Island	cg12934884	S_Shelf
cg13413286	Island	cg12961842	Island
cg13416213	Island	cg12968041	S_Shore
cg13442428	Island	cg12993715	N_Shore
cg13450005	Island	cg13008631	Island
cg13461447	Island	cg13023584	Island
cg13463054	Island	cg13023870	N_Shore
cg13464448	Island	cg13045774	OpenSea
cg13486410	Island	cg13056927	Island
cg13491481	Island	cg13058819	S_Shore
cg13491690	Island	cg13081331	OpenSea
cg13498289	Island	cg13086574	Island
cg13525837	Island	cg13125157	S_Shore
cg13533340	Island	cg13166748	OpenSea
cg13534450	S_Shore	cg13169132	N_Shore
cg13536757	Island	cg13181974	N_Shore
cg13562911	Island	cg13185188	Island
cg13565656	Island	cg13221347	OpenSea
cg13567541	N_Shore	cg13225830	OpenSea
cg13574390	Island	cg13245152	S_Shore
cg13592399	Island	cg13268590	OpenSea
cg13596833	Island	cg13292470	N_Shore
cg13597397	S_Shore	cg13293524	N_Shelf
cg13604337	Island	cg13298147	N_Shore
cg13619824	Island	cg13302994	OpenSea
cg13619915	OpenSea	cg13337731	OpenSea
cg13631572	Island	cg13341668	Island
cg13643914	Island	cg13341982	OpenSea
cg13663793	Island	cg13344095	OpenSea
cg13689003	Island	cg13356253	Island
cg13722431	Island	cg13356896	Island
cg13726345	Island	cg13377102	Island
cg13726682	Island	cg13388615	Island
cg13758646	Island	cg13390867	OpenSea
cg13759674	Island	cg13392078	N_Shore
cg13762060	Island	cg13393580	S_Shelf
cg13765939	Island	cg13401014	N_Shore
cg13768269	Island	cg13401893	Island
cg13773914	Island	cg13407335	Island
cg13774792	Island	cg13433694	N_Shore
cg13776340	Island	cg13448197	Island
cg13795264	Island	cg13455717	Island
cg13798300	S_Shore	cg13458609	OpenSea
cg13807970	Island	cg13463245	Island
cg13834146	Island	cg13494489	Island
cg13836638	Island	cg13495205	Island
cg13837913	S_Shore	cg13504318	Island
cg13848989	S_Shore	cg13505608	N_Shore
cg13867237	Island	cg13507084	OpenSea
cg13867865	Island	cg13509363	Island
cg13874817	Island	cg13512268	Island
cg13875536	Island	cg13516209	Island
cg13886354	N_Shore	cg13522891	OpenSea
cg13904267	Island	cg13526469	Island
cg13906377	N_Shelf	cg13537237	S_Shelf
cg13907049	Island	cg13545212	Island
cg13911723	Island	cg13563023	OpenSea
cg13916740	Island	cg13568106	OpenSea
cg13930300	Island	cg13588403	OpenSea
cg13930892	Island	cg13607230	N_Shore
cg13935962	Island	cg13613044	OpenSea
cg13938881	N_Shore	cg13614409	OpenSea
cg13951042	Island	cg13618741	S_Shore
cg13969265	Island	cg13620034	N_Shore
cg13973813	Island	cg13621396	N_Shore
cg13975336	Island	cg13634242	Island
cg13990092	Island	cg13640071	OpenSea
cg13997864	Island	cg13642436	OpenSea
cg14005139	Island	cg13647973	Island
cg14017655	Island	cg13661519	N_Shelf
cg14026561	N_Shore	cg13667243	Island
cg14047019	Island	cg13668207	OpenSea
cg14048780	Island	cg13668339	N_Shore
cg14060111	Island	cg13668618	Island
cg14065127	Island	cg13683667	OpenSea
cg14067419	Island	cg13689699	OpenSea
cg14081924	Island	cg13692446	Island
cg14089984	Island	cg13692543	OpenSea
cg14098468	N_Shore	cg13702222	OpenSea
cg14120010	Island	cg13702536	OpenSea
cg14123923	Island	cg13721589	Island
cg14131526	Island	cg13731808	OpenSea
cg14140881	N_Shore	cg13737221	Island
cg14142965	Island	cg13759905	S_Shore
cg14149680	Island	cg13762244	Island
cg14168530	Island	cg13763345	OpenSea
cg14172603	Island	cg13769834	Island
cg14178748	Island	cg13773247	OpenSea
cg14185025	Island	cg13799504	N_Shore
cg14186641	Island	cg13800209	Island
cg14203032	Island	cg13808071	OpenSea
cg14212504	Island	cg13808936	OpenSea
cg14214706	Island	cg13818451	Island
cg14215586	Island	cg13832669	N_Shore
cg14222656	Island	cg13868216	Island
cg14236735	Island	cg13874780	N_Shore
cg14263942	Island	cg13878677	OpenSea
cg14267263	Island	cg13879455	S_Shore
cg14287112	Island	cg13883721	OpenSea
cg14306451	Island	cg13896204	Island
cg14306734	Island	cg13902110	OpenSea
cg14310034	S_Shore	cg13909178	N_Shore
cg14320054	Island	cg13929270	N_Shore
cg14326413	N_Shore	cg13934406	N_Shore
cg14335782	Island	cg13937905	N_Shore
cg14339043	Island	cg13939462	S_Shore
cg14343214	N_Shore	cg13941474	OpenSea
cg14344315	Island	cg13951697	OpenSea
cg14346208	S_Shore	cg13952483	OpenSea
cg14364356	Island	cg13986670	Island
cg14380270	Island	cg13990947	S_Shore
cg14405893	Island	cg13997975	Island
cg14409023	N_Shore	cg14000125	S_Shore
cg14409941	Island	cg14008686	OpenSea
cg14447606	Island	cg14015656	Island
cg14458834	Island	cg14025053	S_Shore
cg14467488	Island	cg14027288	Island
cg14470978	Island	cg14035368	Island
cg14497781	Island	cg14058329	Island
cg14506196	Island	cg14064335	OpenSea
cg14510812	Island	cg14084907	Island
cg14514237	N_Shore	cg14089267	Island
cg14527456	Island	cg14101485	Island
cg14528318	Island	cg14108567	OpenSea
cg14553243	Island	cg14115936	OpenSea
cg14556070	Island	cg14118515	N_Shore
cg14557534	Island	cg14126328	OpenSea
cg14560001	Island	cg14126601	S_Shore
cg14562712	Island	cg14138969	N_Shelf
cg14568217	Island	cg14147184	Island
cg14572967	Island	cg14147498	N_Shore
cg14573089	Island	cg14152268	OpenSea
cg14575053	OpenSea	cg14160518	Island
cg14579819	Island	cg14161454	S_Shore
cg14597534	N_Shore	cg14166284	Island
cg14598327	Island	cg14171460	Island
cg14611398	Island	cg14175690	S_Shore
cg14614314	Island	cg14178533	Island
cg14633783	Island	cg14190534	N_Shore
cg14673256	Island	cg14202338	Island
cg14677681	Island	cg14209781	OpenSea
cg14681055	Island	cg14216068	Island
cg14686113	N_Shore	cg14216672	OpenSea
cg14689219	Island	cg14223001	Island
cg14701643	Island	cg14239515	Island
cg14717170	OpenSea	cg14239592	Island
cg14718568	Island	cg14242995	OpenSea
cg14732998	Island	cg14254745	N_Shore
cg14743594	Island	cg14262681	N_Shore
cg14747563	Island	cg14272084	OpenSea
cg14773260	Island	cg14273027	S_Shore
cg14776114	Island	cg14294859	OpenSea
cg14776962	Island	cg14315430	N_Shore
cg14777772	Island	cg14316944	N_Shore
cg14784497	Island	cg14325153	Island
cg14839351	Island	cg14326671	OpenSea
cg14843800	Island	cg14331765	OpenSea
cg14847688	Island	cg14353258	S_Shelf
cg14855334	Island	cg14361672	N_Shore
cg14872657	Island	cg14367020	N_Shore
cg14897833	Island	cg14409958	OpenSea
cg14921743	N_Shore	cg14416371	Island
cg14923157	OpenSea	cg14453174	OpenSea
cg14957943	Island	cg14480446	S_Shelf
cg14965220	Island	cg14480530	Island
cg14982203	N_Shore	cg14482968	OpenSea
cg15038664	Island	cg14491362	S_Shelf
cg15051226	Island	cg14496753	N_Shore
cg15058464	Island	cg14503441	OpenSea
cg15063465	S_Shore	cg14517743	Island
cg15072319	Island	cg14543226	N_Shelf
cg15087347	N_Shore	cg14557185	Island
cg15090083	Island	cg14557787	S_Shore
cg15127227	Island	cg14558880	S_Shore
cg15146859	Island	cg14560110	Island
cg15167155	Island	cg14573833	N_Shore
cg15174834	Island	cg14578009	S_Shore
cg15179725	Island	cg14605520	Island
cg15184602	Island	cg14613540	OpenSea
cg15185479	Island	cg14644001	Island
cg15187550	Island	cg14652587	OpenSea
cg15208375	Island	cg14657277	OpenSea
cg15237265	Island	cg14672084	Island
cg15245095	OpenSea	cg14677698	OpenSea
cg15247111	Island	cg14708990	OpenSea
cg15249639	Island	cg14710465	N_Shore
cg15281774	Island	cg14711997	Island
cg15304699	Island	cg14716990	N_Shore
cg15322783	Island	cg14739664	Island
cg15344419	Island	cg14742937	OpenSea
cg15376615	Island	cg14776998	S_Shore
cg15385562	Island	cg14801518	N_Shore
cg15386964	Island	cg14819504	Island
cg15387132	Island	cg14830003	Island
cg15407528	Island	cg14833891	OpenSea
cg15424739	Island	cg14852082	Island
cg15444947	Island	cg14861089	Island
cg15457058	Island	cg14864148	Island
cg15489250	S_Shore	cg14866032	N_Shore
cg15543173	Island	cg14875327	OpenSea
cg15545772	Island	cg14904662	Island
cg15547669	Island	cg14911521	N_Shore
cg15552158	S_Shore	cg14931854	OpenSea
cg15562912	Island	cg14949292	Island
cg15565065	Island	cg14952359	Island
cg15573040	Island	cg14964336	Island
cg15630907	Island	cg14970987	OpenSea
cg15637465	Island	cg14971320	S_Shore
cg15651650	Island	cg14972139	OpenSea
cg15684724	Island	cg14976741	OpenSea
cg15692992	Island	cg14979301	N_Shore
cg15720669	Island	cg14981253	S_Shore
cg15724773	Island	cg14987431	Island
cg15728861	Island	cg15006175	Island
cg15744359	Island	cg15014975	Island
cg15769764	Island	cg15015122	Island
cg15778012	Island	cg15015639	N_Shore
cg15778437	Island	cg15070513	N_Shore
cg15799279	Island	cg15077193	N_Shore
cg15800530	Island	cg15079315	OpenSea
cg15852572	Island	cg15079934	Island
cg15871441	Island	cg15083233	N_Shore
cg15876464	Island	cg15092343	Island
cg15885440	Island	cg15122993	Island
cg15885628	S_Shore	cg15133351	N_Shore
cg15890143	Island	cg15164702	N_Shore
cg15890274	Island	cg15184687	S_Shore
cg15909933	Island	cg15197065	OpenSea
cg15928538	Island	cg15215348	S_Shore
cg15947096	S_Shore	cg15219228	Island
cg15988350	Island	cg15229124	S_Shore
cg15991072	Island	cg15235798	N_Shore
cg15991262	Island	cg15245556	N_Shore
cg15993383	Island	cg15255455	N_Shore
cg16002355	Island	cg15255946	Island
cg16022575	Island	cg15265102	N_Shore
cg16023415	Island	cg15332386	OpenSea
cg16025094	Island	cg15409097	Island
cg16048517	Island	cg15425541	S_Shelf
cg16063989	N_Shore	cg15443535	Island
cg16079958	Island	cg15449217	Island
cg16099707	Island	cg15452135	Island
cg16099804	Island	cg15463284	Island
cg16105558	Island	cg15469871	Island
cg16132520	Island	cg15473155	N_Shore
cg16158807	Island	cg15497761	Island
cg16167741	OpenSea	cg15504461	N_Shore
cg16172814	Island	cg15506703	Island
cg16225168	S_Shore	cg15530351	OpenSea
cg16230141	Island	cg15555527	Island
cg16238815	OpenSea	cg15560061	Island
cg16246961	Island	cg15607672	N_Shore
cg16260298	Island	cg15613420	S_Shore
cg16277128	Island	cg15622158	OpenSea
cg16278512	Island	cg15645660	Island
cg16289417	N_Shore	cg15651925	OpenSea
cg16292168	Island	cg15659132	OpenSea
cg16303846	S_Shore	cg15671317	OpenSea
cg16304215	S_Shore	cg15673034	Island
cg16306115	Island	cg15680288	OpenSea
cg16317459	Island	cg15684702	OpenSea
cg16325777	Island	cg15696816	Island
cg16332610	Island	cg15708405	Island
cg16353957	Island	cg15712177	S_Shore
cg16358826	S_Shore	cg15718494	S_Shore
cg16364709	Island	cg15720089	OpenSea
cg16366473	Island	cg15730491	Island
cg16366843	Island	cg15753394	S_Shore
cg16368442	Island	cg15754594	OpenSea
cg16383592	Island	cg15766101	Island
cg16397884	N_Shore	cg15788537	OpenSea
cg16398329	Island	cg15810415	N_Shore
cg16400999	Island	cg15818671	Island
cg16405026	Island	cg15826897	N_Shore
cg16405637	Island	cg15833940	OpenSea
cg16430072	Island	cg15839431	Island
cg16437728	Island	cg15847527	OpenSea
cg16439198	Island	cg15848986	S_Shore
cg16447589	S_Shore	cg15888472	OpenSea
cg16447865	Island	cg15891218	S_Shore
cg16473125	Island	cg15902390	Island
cg16474297	Island	cg15907146	Island
cg16478774	Island	cg15915602	Island
cg16482474	Island	cg15929797	Island
cg16501308	Island	cg15954353	Island
cg16504626	Island	cg15963714	Island
cg16509658	Island	cg15966747	Island
cg16512615	Island	cg15975806	OpenSea
cg16523704	Island	cg15990629	N_Shore
cg16528511	Island	cg16002305	OpenSea
cg16559598	Island	cg16005559	S_Shore
cg16573328	Island	cg16017089	Island
cg16576620	Island	cg16020346	OpenSea
cg16582118	Island	cg16023943	Island
cg16585651	Island	cg16038120	Island
cg16590005	Island	cg16043651	N_Shore
cg16595365	Island	cg16054907	Island
cg16596102	Island	cg16071219	OpenSea
cg16604243	Island	cg16077929	N_Shore
cg16611005	Island	cg16078649	Island
cg16627829	S_Shelf	cg16080552	Island
cg16682329	OpenSea	cg16135989	N_Shelf
cg16700000	Island	cg16175245	Island
cg16714055	Island	cg16192707	N_Shore
cg16721177	OpenSea	cg16204066	OpenSea
cg16749235	Island	cg16234557	N_Shore
cg16781205	Island	cg16234978	Island
cg16791424	S_Shore	cg16236228	N_Shelf
cg16794576	Island	cg16260241	Island
cg16802151	Island	cg16265717	S_Shore
cg16806794	Island	cg16268165	OpenSea
cg16848624	Island	cg16269733	Island
cg16862295	Island	cg16288089	Island
cg16877924	Island	cg16291917	S_Shore
cg16890428	S_Shore	cg16297435	S_Shore
cg16896847	Island	cg16298547	N_Shore
cg16899920	Island	cg16313343	S_Shore
cg16909109	Island	cg16316624	N_Shore
cg16909408	Island	cg16330369	OpenSea
cg16915821	Island	cg16334425	OpenSea
cg16918989	Island	cg16387254	N_Shore
cg16921310	Island	cg16393012	OpenSea
cg16924702	Island	cg16398133	N_Shelf
cg16933181	Island	cg16399632	Island
cg16935065	Island	cg16406967	Island
cg16943529	Island	cg16414472	OpenSea
cg16958716	Island	cg16415457	OpenSea
cg16964389	N_Shore	cg16437211	S_Shelf
cg16976370	Island	cg16437908	N_Shore
cg16988072	Island	cg16438182	S_Shore
cg16994506	Island	cg16481280	N_Shore
cg17003293	Island	cg16492341	Island
cg17009433	Island	cg16510548	N_Shore
cg17029156	Island	cg16529477	S_Shore
cg17030055	OpenSea	cg16561266	Island
cg17037963	Island	cg16573755	N_Shore
cg17039391	Island	cg16575694	S_Shore
cg17045801	Island	cg16580616	OpenSea
cg17082661	N_Shore	cg16585972	Island
cg17087331	Island	cg16608652	OpenSea
cg17087479	Island	cg16609181	Island
cg17091361	Island	cg16617141	Island
cg17125477	Island	cg16647921	Island
cg17147211	Island	cg16651537	N_Shore
cg17151990	Island	cg16653138	Island
cg17165580	Island	cg16653901	S_Shore
cg17171215	Island	cg16656493	Island
cg17199247	Island	cg16670359	Island
cg17202313	Island	cg16672562	S_Shore
cg17216759	Island	cg16674248	S_Shore
cg17228900	Island	cg16674860	OpenSea
cg17256532	Island	cg16680438	Island
cg17276590	Island	cg16701167	S_Shore
cg17285225	Island	cg16705744	N_Shore
cg17290701	Island	cg16707895	N_Shelf
cg17299935	Island	cg16752592	OpenSea
cg17307479	Island	cg16758317	N_Shore
cg17318297	Island	cg16762841	N_Shelf
cg17318632	Island	cg16775752	Island
cg17332326	N_Shore	cg16836311	Island
cg17344755	Island	cg16847637	N_Shore
cg17362861	Island	cg16848306	N_Shelf
cg17377467	Island	cg16851482	OpenSea
cg17384056	Island	cg16854876	S_Shore
cg17398252	Island	cg16854917	Island
cg17418463	Island	cg16865446	S_Shore
cg17432453	N_Shore	cg16871561	N_Shore
cg17445120	OpenSea	cg16897193	Island
cg17457986	Island	cg16908633	N_Shore
cg17463149	Island	cg16922937	S_Shore
cg17477445	Island	cg16937268	Island
cg17484036	Island	cg16945633	S_Shore
cg17485454	OpenSea	cg16982073	OpenSea
cg17498296	Island	cg16987900	N_Shore
cg17498773	Island	cg17024828	N_Shore
cg17503456	Island	cg17029019	Island
cg17535595	Island	cg17030173	Island
cg17540356	Island	cg17034390	Island
cg17565078	Island	cg17050616	OpenSea
cg17584804	Island	cg17116120	Island
cg17619993	Island	cg17128947	Island
cg17652435	Island	cg17129188	N_Shore
cg17697633	Island	cg17140381	OpenSea
cg17700915	S_Shore	cg17158414	Island
cg17710021	Island	cg17159890	Island
cg17715556	OpenSea	cg17181255	N_Shore
cg17735983	Island	cg17187167	Island
cg17745088	Island	cg17199181	Island
cg17778441	Island	cg17199367	OpenSea
cg17783401	Island	cg17200465	N_Shore
cg17802600	Island	cg17207590	S_Shore
cg17802942	Island	cg17219660	OpenSea
cg17807131	Island	cg17220545	OpenSea
cg17815252	Island	cg17221738	OpenSea
cg17816394	Island	cg17231999	Island
cg17823751	N_Shore	cg17239236	Island
cg17831269	Island	cg17242351	OpenSea
cg17839237	Island	cg17247873	OpenSea
cg17872757	Island	cg17264670	Island
cg17912370	Island	cg17266581	Island
cg17916490	Island	cg17278072	N_Shore
cg17942639	Island	cg17279125	OpenSea
cg17945419	Island	cg17306279	Island
cg17958315	Island	cg17330251	Island
cg17971936	Island	cg17344932	OpenSea
cg17984375	Island	cg17386213	Island
cg17996329	Island	cg17399362	N_Shore
cg18012760	Island	cg17401179	OpenSea
cg18014624	Island	cg17402060	N_Shelf
cg18015746	Island	cg17432857	Island
cg18044663	Island	cg17437939	Island
cg18066271	Island	cg17454746	Island
cg18072802	Island	cg17469359	OpenSea
cg18109777	S_Shore	cg17471939	OpenSea
cg18121355	Island	cg17473580	S_Shore
cg18132916	Island	cg17474422	Island
cg18143243	Island	cg17479501	OpenSea
cg18172881	Island	cg17482033	N_Shore
cg18208707	Island	cg17485681	Island
cg18210732	Island	cg17485838	S_Shore
cg18237607	Island	cg17497608	S_Shore
cg18240143	Island	cg17498717	N_Shelf
cg18245660	Island	cg17508991	N_Shore
cg18252360	Island	cg17511968	N_Shelf
cg18280362	Island	cg17526103	S_Shore
cg18280463	Island	cg17526573	Island
cg18310412	Island	cg17533927	Island
cg18315040	Island	cg17553149	Island
cg18326365	Island	cg17569124	Island
cg18328894	Island	cg17589883	N_Shore
cg18342279	Island	cg17611512	OpenSea
cg18347921	Island	cg17639394	N_Shore
cg18375494	Island	cg17642369	OpenSea
cg18403551	Island	cg17651959	S_Shore
cg18403606	Island	cg17674042	OpenSea
cg18409528	Island	cg17675288	Island
cg18412834	Island	cg17726692	OpenSea
cg18417953	S_Shore	cg17736443	S_Shore
cg18422875	Island	cg17739279	N_Shore
cg18432099	Island	cg17754510	S_Shore
cg18438124	Island	cg17760405	Island
cg18440199	N_Shore	cg17762073	Island
cg18451022	Island	cg17763019	N_Shore
cg18453621	Island	cg17766560	Island
cg18477204	Island	cg17767484	OpenSea
cg18484034	S_Shore	cg17772163	N_Shore
cg18485844	Island	cg17786496	N_Shore
cg18488855	S_Shore	cg17794299	Island
cg18500192	Island	cg17797591	N_Shore
cg18507707	Island	cg17803965	OpenSea
cg18533386	Island	cg17807172	OpenSea
cg18567682	Island	cg17817564	S_Shore
cg18603154	Island	cg17873612	N_Shore
cg18614984	Island	cg17910813	N_Shore
cg18624636	Island	cg17935217	Island
cg18630040	Island	cg17978367	Island
cg18676237	Island	cg18005337	Island
cg18689958	Island	cg18023283	Island
cg18710929	Island	cg18045515	N_Shore
cg18726691	Island	cg18063312	Island
cg18750086	Island	cg18077971	S_Shore
cg18750167	OpenSea	cg18091469	Island
cg18756545	S_Shore	cg18103859	S_Shore
cg18765463	Island	cg18143792	S_Shore
cg18771173	Island	cg18147485	Island
cg18772588	Island	cg18156486	Island
cg18784506	S_Shore	cg18161327	S_Shelf
cg18794577	Island	cg18181229	Island
cg18795461	Island	cg18213495	N_Shelf
cg18800085	Island	cg18229178	Island
cg18836493	Island	cg18243760	Island
cg18845189	Island	cg18249580	N_Shore
cg18867004	N_Shore	cg18253473	OpenSea
cg18875716	S_Shore	cg18264486	Island
cg18881873	Island	cg18275228	OpenSea
cg18882819	Island	cg18278899	Island
cg18891712	OpenSea	cg18282849	Island
cg18918349	Island	cg18286501	S_Shore
cg18930994	Island	cg18302225	N_Shore
cg18932809	Island	cg18316974	Island
cg18949300	Island	cg18322510	N_Shore
cg18959478	Island	cg18322569	Island
cg18960642	Island	cg18334345	OpenSea
cg18966597	Island	cg18356785	Island
cg18972666	S_Shore	cg18363918	N_Shore
cg18972849	N_Shore	cg18365406	Island
cg18976437	Island	cg18383585	OpenSea
cg18977541	OpenSea	cg18384460	OpenSea
cg18995088	Island	cg18395917	Island
cg19003797	Island	cg18397073	Island
cg19006003	OpenSea	cg18397998	N_Shore
cg19045644	Island	cg18404706	Island
cg19047292	S_Shelf	cg18428193	Island
cg19065831	N_Shore	cg18438793	Island
cg19086540	N_Shore	cg18439861	Island
cg19098796	N_Shore	cg18447419	N_Shore
cg19109538	N_Shore	cg18451016	Island
cg19113375	Island	cg18454133	Island
cg19113641	Island	cg18455390	OpenSea
cg19118812	Island	cg18465484	OpenSea
cg19129369	Island	cg18470427	OpenSea
cg19165854	Island	cg18479593	Island
cg19171596	Island	cg18486815	OpenSea
cg19194098	Island	cg18495047	Island
cg19201719	Island	cg18499201	OpenSea
cg19205994	Island	cg18502142	OpenSea
cg19216563	OpenSea	cg18503031	OpenSea
cg19236679	Island	cg18525352	S_Shore
cg19263700	OpenSea	cg18530645	Island
cg19266910	Island	cg18540249	N_Shore
cg19268498	Island	cg18542688	N_Shelf
cg19283840	Island	cg18566515	N_Shore
cg19309580	N_Shelf	cg18567924	S_Shore
cg19313043	Island	cg18575532	S_Shore
cg19324714	N_Shore	cg18576957	Island
cg19343631	Island	cg18588323	Island
cg19355186	Island	cg18592561	Island
cg19378416	N_Shore	cg18628255	Island
cg19378640	Island	cg18631330	S_Shore
cg19411474	N_Shore	cg18648037	OpenSea
cg19422030	N_Shore	cg18680977	Island
cg19435033	Island	cg18684142	N_Shelf
cg19443257	Island	cg18690729	OpenSea
cg19446838	Island	cg18693051	N_Shore
cg19485539	Island	cg18705909	Island
cg19488620	Island	cg18709349	Island
cg19497031	Island	cg18709881	Island
cg19498237	Island	cg18717167	OpenSea
cg19532257	S_Shore	cg18740429	Island
cg19542238	OpenSea	cg18743464	OpenSea
cg19544662	Island	cg18754118	Island
cg19547629	Island	cg18782604	Island
cg19564098	Island	cg18786593	S_Shore
cg19595012	S_Shore	cg18788664	Island
cg19595234	Island	cg18791991	Island
cg19596273	S_Shore	cg18812904	Island
cg19611175	Island	cg18833788	N_Shelf
cg19633231	Island	cg18841159	Island
cg19636656	Island	cg18848959	Island
cg19647755	Island	cg18859248	Island
cg19655456	Island	cg18862597	OpenSea
cg19656577	Island	cg18881778	N_Shore
cg19665644	Island	cg18883476	OpenSea
cg19675288	Island	cg18899220	Island
cg19679633	Island	cg18903093	N_Shore
cg19679989	Island	cg18921306	OpenSea
cg19719547	Island	cg18942934	Island
cg19721867	Island	cg18956933	Island
cg19734015	N_Shore	cg19007141	OpenSea
cg19752891	Island	cg19008099	Island
cg19766441	Island	cg19022254	S_Shore
cg19769760	Island	cg19048532	Island
cg19807257	Island	cg19049754	Island
cg19850348	Island	cg19084479	S_Shore
cg19868631	Island	cg19111999	N_Shore
cg19875368	Island	cg19112186	Island
cg19899694	Island	cg19142026	Island
cg19900615	Island	cg19156875	Island
cg19915064	Island	cg19186614	Island
cg19915711	Island	cg19206146	OpenSea
cg19937938	Island	cg19211851	OpenSea
cg19939997	Island	cg19211931	N_Shore
cg19944763	Island	cg19213744	OpenSea
cg19968403	OpenSea	cg19236794	Island
cg19987611	Island	cg19254118	N_Shore
cg20003494	N_Shore	cg19266671	S_Shore
cg20014049	Island	cg19268976	N_Shore
cg20014960	Island	cg19284726	Island
cg20019019	OpenSea	cg19291576	Island
cg20078466	Island	cg19307528	N_Shore
cg20079899	Island	cg19351954	OpenSea
cg20099104	Island	cg19361032	S_Shelf
cg20107759	N_Shore	cg19386484	Island
cg20129313	Island	cg19401033	N_Shore
cg20145692	Island	cg19414598	Island
cg20147819	Island	cg19418458	Island
cg20154403	S_Shore	cg19423622	Island
cg20166714	Island	cg19437183	OpenSea
cg20169702	OpenSea	cg19467964	OpenSea
cg20185017	Island	cg19489503	N_Shore
cg20191310	Island	cg19497523	Island
cg20193324	Island	cg19506677	Island
cg20198108	N_Shore	cg19512582	OpenSea
cg20214477	S_Shore	cg19518104	N_Shore
cg20219035	Island	cg19548479	Island
cg20229534	N_Shore	cg19566405	OpenSea
cg20257553	S_Shore	cg19577779	Island
cg20275507	N_Shore	cg19592277	Island
cg20276585	Island	cg19634573	OpenSea
cg20279673	Island	cg19635505	Island
cg20285128	Island	cg19639041	N_Shore
cg20297199	Island	cg19653212	Island
cg20319091	Island	cg19659741	OpenSea
cg20324884	Island	cg19678392	Island
cg20329153	Island	cg19687230	S_Shore
cg20334627	Island	cg19697382	OpenSea
cg20340508	Island	cg19709608	S_Shelf
cg20357628	Island	cg19718309	OpenSea
cg20403498	Island	cg19725553	Island
cg20413471	Island	cg19741660	OpenSea
cg20422505	Island	cg19744936	N_Shore
cg20443778	Island	cg19746567	OpenSea
cg20460797	Island	cg19754520	Island
cg20495645	Island	cg19757631	N_Shore
cg20498414	Island	cg19797516	S_Shore
cg20506550	Island	cg19811337	N_Shore
cg20528583	Island	cg19817652	N_Shore
cg20541238	Island	cg19839825	S_Shore
cg20567847	Island	cg19841005	Island
cg20569287	Island	cg19851816	Island
cg20594401	S_Shore	cg19854521	S_Shore
cg20599798	Island	cg19859290	Island
cg20603260	Island	cg19873496	OpenSea
cg20607331	Island	cg19878627	Island
cg20618622	Island	cg19907479	Island
cg20675505	S_Shore	cg19923393	OpenSea
cg20701404	Island	cg19940077	Island
cg20701486	Island	cg19961545	Island
cg20702559	Island	cg19966212	OpenSea
cg20707780	Island	cg19978312	Island
cg20709008	N_Shore	cg19980771	Island
cg20718816	Island	cg19986012	Island
cg20734421	Island	cg19990651	Island
cg20751361	Island	cg19997502	S_Shore
cg20761860	Island	cg20003638	S_Shore
cg20767111	Island	cg20014398	Island
cg20776240	Island	cg20017132	Island
cg20781461	Island	cg20045320	S_Shore
cg20797858	Island	cg20056542	Island
cg20803547	Island	cg20079298	Island
cg20813081	Island	cg20092531	Island
cg20864608	Island	cg20102877	Island
cg20880234	Island	cg20129210	Island
cg20893717	Island	cg20148575	Island
cg20905516	Island	cg20152309	Island
cg20910102	Island	cg20152430	N_Shore
cg20915632	Island	cg20208600	N_Shore
cg20936013	Island	cg20223322	OpenSea
cg20944305	Island	cg20243176	N_Shore
cg20950465	Island	cg20254354	N_Shore
cg20959325	Island	cg20257821	N_Shore
cg20967975	Island	cg20268341	OpenSea
cg20971220	Island	cg20268352	OpenSea
cg20973347	Island	cg20272979	Island
cg20978694	Island	cg20345556	OpenSea
cg20979852	Island	cg20386316	S_Shore
cg20991347	Island	cg20415053	OpenSea
cg21005853	Island	cg20431191	S_Shore
cg21029447	Island	cg20435535	Island
cg21039778	Island	cg20443357	S_Shelf
cg21068522	N_Shore	cg20456258	Island
cg21068911	Island	cg20485758	OpenSea
cg21074260	Island	cg20494374	OpenSea
cg21079345	Island	cg20503956	N_Shore
cg21158411	Island	cg20523861	S_Shore
cg21180286	Island	cg20531550	Island
cg21184256	Island	cg20542619	Island
cg21187769	Island	cg20576162	Island
cg21189727	Island	cg20593826	Island
cg21210962	Island	cg20607287	S_Shore
cg21235078	Island	cg20610452	OpenSea
cg21245277	Island	cg20621765	OpenSea
cg21254450	Island	cg20634967	Island
cg21264189	Island	cg20648501	Island
cg21265540	Island	cg20659435	Island
cg21314480	Island	cg20667364	Island
cg21323441	Island	cg20699586	Island
cg21325154	Island	cg20701556	N_Shore
cg21362478	Island	cg20709110	OpenSea
cg21375928	Island	cg20742009	N_Shore
cg21380341	Island	cg20785796	Island
cg21385047	Island	cg20810072	OpenSea
cg21401879	Island	cg20824189	Island
cg21426239	Island	cg20881942	Island
cg21438101	Island	cg20935363	Island
cg21447117	N_Shore	cg20944157	S_Shore
cg21482621	S_Shore	cg20945566	N_Shore
cg21486944	OpenSea	cg20945738	OpenSea
cg21500133	Island	cg20948258	S_Shore
cg21504064	N_Shore	cg20994660	N_Shore
cg21514227	Island	cg21002957	Island
cg21521683	Island	cg21026830	N_Shore
cg21525592	Island	cg21033440	Island
cg21526205	Island	cg21037935	N_Shore
cg21537383	Island	cg21039708	Island
cg21540437	N_Shore	cg21050013	Island
cg21540810	Island	cg21067775	Island
cg21546671	Island	cg21073930	Island
cg21549294	OpenSea	cg21097354	Island
cg21552709	Island	cg21109192	OpenSea
cg21553524	Island	cg21116266	N_Shore
cg21561970	Island	cg21126626	N_Shore
cg21607030	Island	cg21131024	S_Shore
cg21619653	N_Shore	cg21154793	N_Shore
cg21640187	Island	cg21160842	N_Shore
cg21646598	Island	cg21178978	Island
cg21653132	Island	cg21182196	S_Shore
cg21654383	Island	cg21188409	OpenSea
cg21672843	Island	cg21189438	Island
cg21692846	Island	cg21195256	S_Shore
cg21705897	Island	cg21221840	Island
cg21761844	Island	cg21226965	S_Shore
cg21782376	Island	cg21235151	Island
cg21782409	Island	cg21248554	Island
cg21810188	N_Shore	cg21266975	N_Shore
cg21819468	Island	cg21268658	S_Shore
cg21823999	Island	cg21334513	Island
cg21825879	Island	cg21380024	N_Shore
cg21864259	Island	cg21385909	Island
cg21890726	Island	cg21390082	OpenSea
cg21949512	Island	cg21397393	Island
cg21961527	Island	cg21436572	OpenSea
cg21963535	Island	cg21440365	Island
cg22003366	Island	cg21453451	S_Shore
cg22007163	Island	cg21465150	N_Shelf
cg22007227	Island	cg21472506	Island
cg22007666	OpenSea	cg21475076	Island
cg22008625	Island	cg21475150	Island
cg22009488	Island	cg21483999	N_Shore
cg22027897	Island	cg21488538	S_Shore
cg22036988	Island	cg21519654	OpenSea
cg22054362	Island	cg21535253	Island
cg22058855	Island	cg21540359	Island
cg22074576	Island	cg21545857	Island
cg22096450	Island	cg21548955	Island
cg22120714	N_Shore	cg21549195	Island
cg22125968	Island	cg21556281	N_Shore
cg22154024	N_Shore	cg21561492	N_Shore
cg22191696	Island	cg21571166	N_Shelf
cg22201516	Island	cg21586453	N_Shore
cg22216413	Island	cg21606928	Island
cg22237200	Island	cg21616785	OpenSea
cg22263131	S_Shore	cg21629500	Island
cg22273360	Island	cg21669679	N_Shore
cg22276619	Island	cg21719492	OpenSea
cg22295787	Island	cg21723903	Island
cg22302985	Island	cg21726372	N_Shore
cg22304507	Island	cg21730858	OpenSea
cg22316269	Island	cg21770800	Island
cg22325530	Island	cg21778193	Island
cg22335490	Island	cg21809927	OpenSea
cg22337605	Island	cg21816330	Island
cg22340072	Island	cg21851534	Island
cg22341104	Island	cg21854286	Island
cg22346124	Island	cg21859594	OpenSea
cg22371972	S_Shore	cg21880903	OpenSea
cg22374485	OpenSea	cg21914290	S_Shore
cg22374861	Island	cg21918313	Island
cg22388982	Island	cg21923770	OpenSea
cg22389279	Island	cg21929183	N_Shore
cg22395019	Island	cg21929464	OpenSea
cg22402852	Island	cg21935981	OpenSea
cg22403273	Island	cg21985690	N_Shore
cg22403344	Island	cg22009464	OpenSea
cg22411784	Island	cg22022580	Island
cg22418737	Island	cg22039909	Island
cg22448889	Island	cg22044566	N_Shore
cg22459630	Island	cg22046408	Island
cg22465516	Island	cg22052672	Island
cg22466448	Island	cg22084642	OpenSea
cg22471230	Island	cg22129545	Island
cg22478591	Island	cg22155724	Island
cg22500428	Island	cg22177451	OpenSea
cg22508969	Island	cg22185879	Island
cg22535307	Island	cg22187354	Island
cg22538054	Island	cg22193912	S_Shore
cg22549986	Island	cg22210627	OpenSea
cg22557662	Island	cg22222281	N_Shore
cg22582862	Island	cg22242614	S_Shore
cg22583065	Island	cg22248382	OpenSea
cg22594309	Island	cg22254463	OpenSea
cg22603247	Island	cg22264616	OpenSea
cg22604123	Island	cg22268510	Island
cg22623223	Island	cg22280238	N_Shelf
cg22630755	Island	cg22284422	OpenSea
cg22638597	Island	cg22305293	OpenSea
cg22666828	Island	cg22318514	Island
cg22669623	Island	cg22325294	S_Shore
cg22674412	Island	cg22328208	Island
cg22674613	OpenSea	cg22330763	S_Shelf
cg22679003	Island	cg22348654	N_Shelf
cg22684008	Island	cg22399133	Island
cg22686854	N_Shore	cg22438280	S_Shore
cg22699279	Island	cg22457769	S_Shore
cg22710306	Island	cg22471726	N_Shore
cg22723056	Island	cg22473637	Island
cg22730305	Island	cg22481950	OpenSea
cg22731359	Island	cg22498143	N_Shore
cg22734397	Island	cg22522598	OpenSea
cg22757399	N_Shore	cg22524061	N_Shore
cg22789900	Island	cg22549041	Island
cg22790257	Island	cg22561647	S_Shelf
cg22806837	Island	cg22598885	OpenSea
cg22823146	Island	cg22604316	S_Shore
cg22834653	Island	cg22610645	Island
cg22839075	N_Shore	cg22619549	OpenSea
cg22841810	Island	cg22620090	Island
cg22862480	Island	cg22630939	Island
cg22863523	Island	cg22653140	OpenSea
cg22868282	Island	cg22657492	Island
cg22871668	Island	cg22678136	Island
cg22878622	Island	cg22681934	N_Shore
cg22889573	Island	cg22682811	Island
cg22898797	Island	cg22685816	Island
cg22899100	Island	cg22711676	N_Shore
cg22928016	S_Shore	cg22719241	S_Shore
cg22955973	Island	cg22723502	N_Shore
cg22976979	Island	cg22725685	S_Shore
cg22994281	Island	cg22747501	N_Shore
cg22994808	Island	cg22749859	N_Shelf
cg23003500	Island	cg22761670	OpenSea
cg23011597	S_Shore	cg22770135	OpenSea
cg23027521	Island	cg22784954	Island
cg23027583	Island	cg22789982	Island
cg23033906	Island	cg22790377	S_Shore
cg23042796	Island	cg22795891	S_Shore
cg23046903	Island	cg22798849	Island
cg23048068	Island	cg22803560	OpenSea
cg23071808	Island	cg22822446	OpenSea
cg23084951	OpenSea	cg22848598	Island
cg23085912	S_Shore	cg22865470	Island
cg23107161	OpenSea	cg22914338	Island
cg23108709	Island	cg22958090	Island
cg23113963	Island	cg22961212	OpenSea
cg23130010	Island	cg22961457	Island
cg23134869	N_Shore	cg22969524	N_Shore
cg23173307	Island	cg22985016	N_Shore
cg23177772	Island	cg22992730	N_Shore
cg23207710	Island	cg22993195	Island
cg23209255	Island	cg23008871	Island
cg23218760	Island	cg23009044	OpenSea
cg23220551	Island	cg23018755	S_Shore
cg23226129	Island	cg23041109	OpenSea
cg23242697	Island	cg23049458	Island
cg23242863	S_Shore	cg23050442	Island
cg23296010	Island	cg23068797	OpenSea
cg23302603	Island	cg23072161	OpenSea
cg23318812	Island	cg23076537	N_Shelf
cg23337361	N_Shore	cg23079252	Island
cg23376821	Island	cg23081604	S_Shore
cg23391785	Island	cg23087153	N_Shore
cg23401912	Island	cg23097402	Island
cg23405575	N_Shore	cg23175023	N_Shore
cg23407507	Island	cg23179456	Island
cg23418339	Island	cg23189410	N_Shore
cg23424273	Island	cg23194766	N_Shore
cg23426238	Island	cg23216745	OpenSea
cg23441441	Island	cg23236370	S_Shore
cg23448584	Island	cg23238119	Island
cg23460835	Island	cg23239574	S_Shore
cg23473285	S_Shore	cg23245007	S_Shore
cg23474211	Island	cg23263937	N_Shore
cg23482397	Island	cg23267558	S_Shore
cg23495733	N_Shore	cg23268197	Island
cg23511613	Island	cg23272544	Island
cg23528400	Island	cg23288725	Island
cg23564700	Island	cg23292965	OpenSea
cg23615676	Island	cg23298047	S_Shore
cg23658744	Island	cg23302730	OpenSea
cg23662501	Island	cg23314826	OpenSea
cg23664459	Island	cg23347399	N_Shore
cg23684074	Island	cg23348014	OpenSea
cg23697417	Island	cg23348155	Island
cg23702412	Island	cg23350336	S_Shore
cg23718026	Island	cg23359665	N_Shore
cg23728669	Island	cg23363832	S_Shore
cg23730181	Island	cg23365801	Island
cg23738624	Island	cg23398076	S_Shelf
cg23740882	Island	cg23404330	Island
[truncated: 336 more rows]

## Sheet: TableS5_Hypo_Genes
Table S5. Genes identified in the hypomethylation direction that have signficant correlation between DNA methylation and expression levels
∆Meth only	Rel ∆Meth only	Overlap
PXDN	HPCAL4	A1CF
CACNA2D1	C11orf21	A2BP1
GRM7	ELFN2	ABL2
MUM1L1	SELPLG	ABLIM2
ZNF423	TCN1	ADARB2
PRKAR1B	EBF1	ADCY2
ZNF256	FGF14	AFF3
EDN3	SYTL3	AGBL4
FAM135B	TGIF2LX	AJAP1
B3GAT1	ZNF394	ALK
NALCN	DGKG	AMPH
KCTD16	SLC12A5	ANKS1B
HEPH	PIK3CG	ANO2
ODZ3	MAPK12	APBA2
ACSM1	PEBP4	ARHGAP28
LRIT2	ITPR2	ARHGAP6
KY	PRKAG2	ASTN1
WSCD1	GNG7	ATP10A
ZBTB16	ARL11	ATP13A5
C14orf37	DPCR1	ATP8A2
NPY2R	KCNIP1	BAI1
ZNF536	PRKCH	BASP1
NRSN1	MED20	BMP2
TPPP	ACSL1	BRSK2
ATP10B	SLC18A1	C11orf41
CNR1	EDEM1	C14orf64
SLC8A1	FLRT2	C3orf50
KCNA4	CXorf1	C6
LOC285401	SLC8A3	CA10
MMP26	CLSTN2	CACNA1A
INS-IGF2	KIF6	CACNA1C
BTNL2	TIAM2	CACNA1E
LAMA1	PSTPIP1	CACNA1G
PLCL1	ZMAT4	CACNA1H
ADCYAP1R1	C17orf108	CACNA2D3
WDR86	CALCB	CAMTA1
CHL1	ITGA4	CAPN13
FAM19A1	S100A9	CBFA2T3
CORO2B	S1PR4	CD1C
AASS	TRIM15	CDH13
SFMBT2	ABCA17P	CDH4
XKR6	KCNK10	CDH8
ZNF311	DUSP5	CHST10
CNTN5	C19orf22	CHST8
DYNC1I1	LOC286467	CLYBL
YIPF7	C8orf34	CNTN1
NAV3	IL21R	CNTNAP5
SLC7A14	CNTNAP2	COL11A2
TPO	BDH2	CSMD1
TNNI3K	ACP5	CTNNA2
FAT3	SCGN	CTNND2
FETUB	NLRP3	CUBN
ZNF835	FFAR2	CUX2
MACROD2	MAD1L1	DGKB
AGXT2	CLIC1	DGKI
FRMD4A	ESYT2	DLG2
CNTN4	NOVA2	DLGAP2
CHP2	SALL3	DPP10
TRIM58	GRAP2	DPP6
EMR1	GZMB	DRP2
ERC2	OR52N2	DSCAM
CHRNA7	SPRR2D	DTNA
LUZP2	XKR4	EBF3
SLC35F1	GRM3	ELMO1
CDK14	ST3GAL6	ESM1
ERN2	MAMLD1	FAM19A5
ABI3BP	DIRC1	FAM49A
HS3ST2	CD28	FAT1
S100A12	ZC3HAV1	FBXL16
DNAH9	C5orf39	FBXL7
FLJ33360	INPP5D	FCER1A
OR2G6	MGAT1	FLG
ADAMTS17	GABRA3	FMN2
MCF2	UMOD	FPR3
TLL1	SLAMF7	FRMD3
ATP2B2	SIGLEC12	GABRB3
ARMC4	ARHGAP15	GALNT9
CD53	GDF6	GLT25D2
FAM171A1	IQSEC1	GNAL
ZNF135	C10orf90	GPC6
PELI2	GPR139	GPR123
TRPV6	MAGEB6	GPR133
ANO5	JAKMIP1	GPR85
OR3A2	MASP1	GPX5
C4orf6	APBB2	GRAMD1B
OR1C1	LOC100124692	GRIN2A
OPRL1	WNT10B	GULP1
DIRC3	IFNG	HDAC9
CDH23	GNPNAT1	HLA-DQA2
MAP2	MCF2L2	HLA-DQB2
GPC5	IGSF11	HLA-DRA
PDE4B	MGAT5B	HMGA2
KLK1	TMEM71	HPYR1
LHFP	LOC642597	HRNBP3
ADAMTSL3	VAMP8	HS6ST3
STOX2	SH3RF2	IGSF21
TSHZ3	R3HCC1	ITIH5
CLEC2B	CHRNB1	JAKMIP3
NTRK3	CD247	JPH3
PLEKHG4B	HS3ST4	KCNB2
GRIK3	BANK1	KCNIP4
TIGIT	GABRB2	KCNJ16
MS4A12	GZMA	KCNJ2
C21orf130	PDE7B	KCNK2
BEND5	KCNQ1	KCNQ2
SLC24A4	MOG	KCNQ5
GALNT14	HRH1	KCNT1
TECTA	EPB41L3	KIF26A
SDC2	FAM196B	KIRREL3
SHC2	MKLN1	KNDC1
OR2T8	GCET2	LCE1B
GDF10	HCK	LDB2
C5orf13	C20orf195	LMO1
PTCHD2	CD7	LOC148696
FCRL3	ZNF804B	LOC254559
NRG3	HOXB2	LRP1B
D4S234E	PDLIM4	LRRC26
SERPINI2	FAM19A2	LRRIQ4
GRM8	VOPP1	MAGI2
CD1D	PRDM9	March1
FAM155A	SELV	MCF2L
DNAH6	UPP1	MDFIC
NOS1	LOC285370	MKRN3
SLC16A7	CCR7	MPPED1
LPA	HMGCLL1	MUC16
GRIK2	ACACA	MYO3A
IAPP	NMUR2	MYOM2
EPHB6	NLRP1	MYT1
ZNF502	PDE6B	MYT1L
IMPG1	SLC6A1	NECAB1
TRHR	TDRD9	NELL2
DSCAML1	RIMS2	NFATC1
DNAH11	C19orf59	NKAIN2
CXCL12	RHOH	NLGN1
PWRN1	ZBP1	NLRP8
ST6GAL2	SYT9	NPTX1
PTPRH	JAK3	NRXN1
NEFM	FCHO1	NRXN3
MAPT	CPAMD8	NTM
SCN9A	PRKG1	OCA2
MS4A1	SLC16A3	ODZ2
CHST9	ADAM7	ODZ4
STK32A	UNC80	OPCML
PNPLA7	MAGEA4	OR2L13
PCSK5	PDE4D	OR6F1
ADAMTSL2	SPOCK2	OR7A5
CACNA1B	CCL5	PACRG
UST	LITAF	PAGE1
TRIM40	MYH9	PARK2
NTNG2	PKHD1	PCBP3
OLFM1	CD3E	PCDHA7
MNDA	IGF2BP3	PCLO
PROKR2	TRPV2	PCSK2
APOB	CAPSL	PDE10A
MAGEE2	UBE2QL1	PDE1A
GABBR2	OLFM3	PDE1C
SYN2	EML1	PEG3
GLB1L2	SEMA3C	PGCP
KCNH8	GFI1	PHACTR1
LOC399959	C6orf134	PHOSPHO2
CHRM3	IL12RB1	PKIA
TACR1	ZC3H12D	PLCH1
PRKAR2B	CALN1	PLD5
C1orf94	PTPN7	PLXNA4
KALRN	BATF	PPP2R2B
CRP	AGAP2	PRDM16
CARD11	ADAM29	PREX2
GAS7	ST3GAL3	PRKD1
COBL	ATP10D	PRLR
CPXM2	ESRRG	PTN
TDH	CD244	PTPN22
ADAMTS10	ST18	PTPRN2
A2M	HMGA1	PTPRZ1
KSR2	CD58	RADIL
LRRC3B	WISP1	RALYL
LECT1	LY9	RASA3
GLB1L3	DAPP1	RASSF2
CACNG3	NKAIN4	RBMS3
CCDC141	GPR77	RELN
MKX	GPR37	RGMA
ZNF667	PDE9A	RGS7
GABRA5	EEF1A2	RIMBP2
MMP16	IL4I1	RIMS1
C11orf63	GRHL2	RORC
SCAND3	CHN2	RP1
GABRB1	ARHGDIB	RPS6KA2
GFRA1	CCDC19	RUNX1
CSMD2	CADM2	RUNX1T1
OR14I1	NIN	RYR2
PDE3A	RCBTB2	RYR3
SCN11A	IL2RA	SCHIP1
HPSE2	KCNAB2	SDK1
RESP18	HPS4	SEMA5A
PKHD1L1	PRAME	SHANK1
LILRB2	TREML2	SHISA9
FAM101B	CCL26	SKA2
PLXDC2	CEACAM3	SLC35F3
JAM3	AKT3	SLC35F4
EPHB1	C10orf93	SLC4A4
FREM2	C20orf26	SLC6A18
TNNT3	RP1-177G6.2	SLC6A3
DTX1	ANK2	SLCO3A1
TMEM59L	TMC8	SLCO5A1
SYT4	MARCH11	SLFN13
TRIM31	MAG	SMOC2
PDGFD	ITPR1	SNTG1
TMEM74	SP1	SNTG2
NRG1	ADAM11	SORCS2
PID1	DEDD2	SOX5
OSBPL3	PAPPA2	SPRR1A
IQCA1	CST7	SPRR1B
PCDH9	TXNRD2	SPRR2A
FOXP2	ANKFN1	SPRR2C
EYA1	NPY	SPRR2G
SERPINB7	AHRR	SPRR4
NBEA	PGAM1	ST6GALNAC3
TMEM90B	RASD2	STK32B
DCHS2	NDST3	SYT14
GABRA1	NFE2L3	TCERG1L
LRRTM4	OSTBETA	THSD7B
ZNF677	SNRPN	TIMP2
LOC100128554	CCR1	TMEM132C
TINAG	MED12L	TMEM132D
NLRP2	SHC3	TNXB
ANKRD45	GALNT2	TRIM55
CHIA	SIRPG	TRPS1
BACH2	NFIX	UBASH3B
ZNF415	TSTD1	UNC13C
ZIK1	ENTPD1	UNC5D
ABCB1	TLN1	VSTM2A
MNAT1	CSK	VWC2
HLA-DPA1	TTLL11	WBSCR17
MUC15	PALM2	ZBTB46
CREB5	SPATA12	ZFPM2
C8orf12	SMC4
THSD7A	ABCA2
OBSCN	GPR65
GRIK4	PIP5K1B
PRKCQ	IGFBPL1
LOC283174	EFHD2
CD5L	CDKN2BAS
MDGA2	PXN
ZNF280B	HCG22
C5orf23	DPYD
CADPS	TTC25
OR52R1	HLA-DPB1
LILRA4	GAD2
VARS	TPK1
NEGR1	MYH16
CRB1	SECTM1
ZNF71	HCN1
SLC5A9	IVL
KIAA0748	BRE
STMN3	PLVAP
LOC285696	METRNL
GBA3	INHBA
GREB1	LOC730811
NCRNA00158	ZFHX4
RNF150	LCE1E
EDA2R	FLJ43663
ACTN2	MFSD4
SLC6A19	CYP7B1
KLHL32	TMEM217
XYLT1	CD86
GRM6	KLHL14
GAP43	GABRA6
CLVS1	CNTN6
SNTB1	C16orf54
GRID2	PLEKHA4
EVC2	PPP2R2C
C16orf45	HEY1
CBLN4	LILRA2
ATP13A4	IKZF1
MYO16	NRG2
LOC150622	FAM189A1
	COL22A1
	CHD5
	MLC1
	NFE2L2
	SPOCK1
	EMP3
	CCL24
	HAVCR2
	GMFG
	AKR1CL1
	EIF2AK1
	TAP1
	LCP1
	ELFN1
	GALNTL6
	NME5
	RMST
	WDR49
	NCAM2
	ERG
	NPR3
	SLC22A18AS
	COL1A1
	KCNK5
	NFKBIE
	FBN2
	SH3PXD2B
	TUBA1C
	TTF2
	BCAN
	CD48
	DAAM2
	KIAA1908
	SYTL1
	BEND7
	SLAMF1
	ZNF229
	BAALC
	GPR132
	SLC39A12
	GABRE
	CYP2C19
	ADHFE1
	BST2
	SPP1
	C1orf101
	SGK1
	DPP4
	PRIMA1
	HLA-DMB
	C15orf53
	SH2D2A
	CD82
	SHANK2
	HLA-E
	OR2L3
	CNGB3
	NPC1
	LPPR1
	DCC
	GRHL3
	LYN
	HRK
	IMMP2L
	TNF
	ATP8B4
	BMPR1B
	MOBKL2A
	CHRDL1
	NFASC
	ARHGAP24
	PTPN14
	NCAM1
	RUNX2
	CHRNA4
	MACF1
	MUC1
	CDH22
	CD22
	TCHH
	KCNA1
	MEIS3
	FCRLB
	CELSR1
	C4orf43
	LRRN2
	TLR1
	ONECUT3
	ADAM28
	TNR
	TNFSF14
	IL1B
	LRP2
	SYNPR
	CPNE4
	TRAM2
	ABHD15
	IL22RA2
	CD151
	CCDC102B
	C7orf16
	LCE3E
	RGS17
	ICAM2
	PKM2
	GRID1
	B4GALNT3
	TMEM177
	CADM3
	RAB27A
	GPR158
	VEPH1
	FLJ22536
	RALGAPA2
	FMNL1
	SDK2
	KIAA1486
	LSAMP
	SCG3
	CSNK1G1
	STMN4
	OCM
	SLC43A3
	HRNR
	VWA3B
	DLC1
	PLS3
	CIITA
	ISL1
	C8orf79
	CDH12
	IL18
	ICAM1
	KHDRBS2
	IGDCC4
	SIRPB1
	FXYD5
	SHISA6
	IFT140
	ESRRB
	DLX3
	DNER
	KRT17
	NELL1
	DKFZP434H168
	ARSF
	SPRR2E
	SCML4

## Sheet: TableS6_Hyper_Genes
Table S6. Genes identified in the hypermethylation direction that have signficant correlation between DNA methylation and expression levels
∆Meth only	Rel ∆Meth only	Overlap
HPCAL1	GIPC2	A2BP1
KLHL14	FAM189A1	ABCA5
STK33	ATP6V1B2	ACP1
HES2	KHDRBS2	ADARB2
RTDR1	C10orf114	ADHFE1
ZNF610	BCL2L10	AJAP1
ZNF773	HTR4	AMN
NXPH1	SLC23A2	ANKRD53
ZNF625	RGS17	APBB1
HIST3H2BB	HOXA4	ARL9
SNX32	SORCS1	ARPC1B
RTN1	HOXD8	ASCL1
HIST1H2BJ	SP8	B3GNT7
IRAK3	TBR1	BAG2
ZNF83	ARHGAP21	BEND5
CCDC13	PHF11	BMP4
KCNH8	CCDC19	BVES
RGS20	TGFBR3	C10orf107
TNFRSF10D	SHISA7	C13orf38
SHOX2	ANO8	C17orf64
NTNG1	DOPEY2	C1orf114
HIST1H3G	CLASP2	C20orf195
ACCN3	ZCCHC14	C5orf38
FOXC1	NRIP2	C6orf186
SCAND3	ISYNA1	C9orf4
ELOVL4	KCNQ1	CA8
INHBB	ZIC1	CABYR
AKR1B1	ARHGDIG	CAMK2N1
JPH3	CIB1	CAV2
POU4F1	KRT27	CBFA2T3
ZNF829	LOC285419	CCDC68
CDH6	KIAA0495	CCDC8
ZNF844	CMIP	CDK6
SLIT1	HOXA3	CDKN2A
DZIP1	TRIP10	CENPV
FOXI3	ZNF300	CHRNB4
SOX8	CLIP3	CHRNE
HOXA1	LOC146880	CHST11
ZNF568	GAMT	CHST2
ZNF470	VAX1	CLCN1
EMX2	STX1B	COL11A2
C3orf55	SLC9A3R2	COL23A1
C10orf67	TFAP2B	COL8A1
MAP6	PITX2	CPLX1
BMPER	PHACTR1	CPLX2
DPY19L2P4	PPFIBP1	CPNE8
SNCB	KLF13	CSMD3
NIPAL4	CDS1	CTNND2
JAM3	STARD10	CXCL12
BMP8B	SOD3	CYB5R2
LRRC67	ZNF167	CYP1B1
CCND2	HS3ST2	CYP24A1
CRMP1	L1TD1	CYP27A1
C16orf86	ALOX12	CYP7B1
EIF4E3	CASP6	DBC1
ABCB4	ITGA5	DCDC2
ZNF570	PON3	DKFZP434H168
CA4	C8orf42	DKK1
CORO6	CCL28	DLX1
HOXA11AS	ORMDL3	DLX6AS
NELL2	FGF5	DNAH14
DFNA5	TACSTD2	DNER
HEY2	CYP26C1	DNM1
TRIL	CACNG6	DNM3
IGF2BP1	FOXP1	DPP10
C1orf103	C11orf52	DPY19L2
PROX1	SOSTDC1	DSC3
DLC1	PLLP	DUOX1
PCDH20	HHIPL1	EFS
DNAH11	COL21A1	ELMOD1
CDH13	LDLR	ELOVL2
NR5A2	GPRC5B	EMILIN2
LRRK2	CA10	EMX2OS
SLC7A4	MYT1L	ENTPD3
SYK	PAK3	EPB41L3
CBLN2	RANBP17	EPDR1
RRN3P1	SKAP1	EPHA4
COL4A3	TMEM79	EPHA6
EFEMP2	ZNF233	EPSTI1
MIXL1	SIX3	ESRRG
RPL39L	PCDHGB1	EYA2
C20orf56	TBX5	FABP5
USP4	GPRIN2	FAM132A
C12orf39	TFPI2	FAM155A
ELMO1	ATP1A1	FAM174B
NRCAM	AGAP2	FAM5C
LOC441046	HEPACAM	FBLN1
ARMC4	KRT7	FBN2
MAL	PCDHB5	FBXL7
COL9A2	PTPRN2	FES
EPHA7	MAPT	FGF12
HES5	C19orf41	FGF14
P2RY1	VAX2	FGF2
UBE2QL1	RAB22A	FHL2
VSNL1	WWTR1	FLI1
ARHGAP20	CSRP1	FMN2
LRRN4	CCDC67	FOXE3
CDX2	IQSEC3	FRAS1
PDK4	KCNA6	FRMD3
CACNA2D3	CCNA1	FRMD4A
FBXO17	SLFN12L	FSTL4
KCTD8	SPRED3	FZD1
ZBTB16	SCG5	FZD7
GABRB2	MTMR7	G0S2
ZSCAN23	SLC38A11	GABRA2
PAX7	PRRT1	GALR1
PDE8B	PCDHAC1	GDF1
EDN3	ZNF418	GFRA1
ZNF323	IRS1	GJA1
LOC285548	UNC80	GLB1L3
ATP1B2	SLC13A5	GPC2
POU3F1	MFSD9	GPR27
SLC7A2	MBNL1	GRASP
ADRA1B	MEIS2	GRB10
ADAMTS19	FBXO2	GREB1L
ZNF528	C8orf56	GRHL2
FAM43B	MBD6	GRIA4
IRX2	DENND3	GRIN1
C5orf49	LY75	GRIN2A
MERTK	TLX1	GRIN3A
C1orf61	GALNT8	GSG1L
KLF14	KIFC2	HAAO
BTBD11	CMYA5	HAPLN3
GNAO1	PLIN5	HDAC7
WNT2	SYNE1	HERC5
MGC45800	DLGAP1	HFE
HOXC9	ENPEP	HIF3A
TMEM163	EPHX3	HLA-F
HFM1	TMEM30B	HLF
INSM1	FOXG1	HMGCLL1
TRIM17	LPAR6	HMSD
PLTP	UNC5A	HNF1B
FUZ	ELOVL7	HOXA7
PRKCQ	ARHGDIB	HOXA9
RGS7	HPS1	HOXD13
KCNC4	HIC1	HPDL
GLDC	COX4I2	HS3ST4
MIAT	APH1B	HSPA1A
CACNA1A	CALN1	HSPB9
CD1D	LOC284276	HTRA1
CDH2	PCDHB13	HYDIN
KCNK13	MYO1F	ICA1
SERP2	MEIS3	IGSF9B
PAK7	KIF13A	IL17D
NAT8L	TMEM26	IRX4
VASH1	DEF6	ITPRIPL1
DDIT4L	SCRT2	KAAG1
C8orf47	PNMAL2	KCNN2
GDF7	DPP6	KCNQ3
FAM150B	MAML3	KCNV1
FSD1	DMC1	KCTD1
TMEM22	SLFN12	KCTD14
CADPS	GRAMD2	KIF5C
SMO	BLVRA	KLHL35
ASS1	GPR75	KRT222
GABBR2	HOXB3	KRTCAP3
ZNF853	TMEM216	LAMA1
NKX2-1	CA13	LHX2
SYT5	ATP5I	LIN7A
CDKL2	LAMP3	LOC255167
CBS	PDE2A	LOC283392
OLFML2A	TNFSF13B	LRAT
GJB6	OCLN	LRRC36
GFRA2	CLMN	LRRN1
SRRM4	RNF212	MAGI2
GPR135	OTX1	MAP1LC3A
CYP11A1	RAB34	March11
ZNF347	DTNA	MFI2
MYADM	LXN	MIR155HG
CNTN1	RNF39	MPPED2
ST6GALNAC3	SPTBN4	MSC
FEZ1	HIST1H4F	MST1R
FLJ45983	CHN2	MT1DP
HIST1H2BH	TRPC7	MT3
TDRD5	OBFC2A	MYEF2
ELOVL3	ADAM32	MYO15A
C13orf18	COL1A2	MYRIP
PAQR9	GPR81	NBL1
C7orf46	VIPR1	NCRNA00202
MAP1B	AIM1L	NDUFA4L2
DOCK10	PCSK2	NFATC1
CCNI2	FUT9	NLGN1
UCP1	RASAL3	NMNAT3
FADS2	NEFL	NOVA1
ADCY1	ADAP1	NPR3
KIF6	PIK3R1	NR2E1
PPM1E	SIM2	NRG1
DKK3	PPP2R2C	NRN1
CRABP2	GRIN2D	NSUN7
HOXB13	PLCXD3	NTM
PKP1	CFTR	NTRK3
NKAIN3	PCDHB6	NXPH4
RAB39	HLA-L	OBSL1
PAX2	HMHA1	OCA2
AP3B2	SIX5	OLIG1
LPL	SEZ6L2	OPCML
ST8SIA4	ZEB2	OXT
B4GALNT2	PRLR	PAOX
CWH43	IL32	PAX6
FLJ16779	CNKSR1	PDGFD
SLC35F1	ZNF536	PDLIM4
PLD5	RBMS1	PHF21B
PIK3CD	MEOX2	PKIA
TOX2	SMPD3	PLBD1
MAP3K8	MAP3K11	PLCB1
RASSF10	PRSS21	POU3F3
SGCE	ZNF154	PPM1H
RSPO4	THRA	PPP1R1B
GPR85	HNF1A	PRDM13
CACNB2	HSPB6	PRDM8
D4S234E	DOK4	PRKCDBP
SDC2	TSPAN18	PTPRT
ZNF549	IRS2	PYGO1
ITGA9	SSPO	QPCT
POU3F2	UHRF1	QRFPR
MESP2	PLEKHA7	RAPGEFL1
SYT13	LOC148824	RASGEF1A
PIP5KL1	NOXO1	RBM24
PCSK5	C13orf26	RBP1
TEKT3	MAPK3	RFTN1
PLXNC1	MUM1	RFX8
ST8SIA1	NKAPL	RIMS2
HOXB4	C1orf14	RIMS4
ERC2	INPP5F	RIN3
ZBTB8B	HOXD3	RORB
SOX7	COL20A1	RPP25
ZNF215	CHST8	RPRM
TNFRSF1B	PDE6B	RPS6KA2
SLC17A6	MATK	RSPH9
CYP2U1	ZNF503	RUNDC3B
GPM6A	AATK	RUNX3
CALCA	ARHGAP23	S1PR1
ZFHX4	TCEA2	SCD5
EMILIN3	TIE1	SCRN1
MLLT11	LGALS8	SDK1
KIF1A	NFKBIL1	SERPINB9
SLC26A5	ABLIM1	SH3GL3
TCF4	SYTL1	SHISA3
EPHB6	ZMYND15	SHISA9
ATRNL1	HLX	SLC12A5
SLC16A12	HTRA4	SLC2A2
PRICKLE1	MITF	SLC30A10
DGKE	GDPD3	SLC35F3
PTHLH	KCNH2	SLC6A15
MGC2889	COL6A3	SLCO4C1
BCL2	SLC2A5	SLITRK3
IRF8	CASZ1	SLITRK5
UNC5C	S100A16	SNAP25
TMEM74	KLF3	SNAP91
ZNF502	CXXC5	SNCA
LOC285696	GPT	SORCS3
ZNF582	THADA	SOX2OT
LRRK1	UPK3B	SPAG17
IHH	MTMR11	SPHK2
GHR	BAI1	SPOCK1
CYGB	STK32C	SPSB4
KCNK2	JAK3	SRCIN1
AGBL4	DHRS3	ST8SIA2
MMP16	SLC22A18	ST8SIA6
RNF182	SALL4	STL
GALNT14	SERPINF2	SYCE1L
KCNJ12	CD248	SYT1
ARL10	MYL9	SYT3
ANKLE1	WDR77	SYT9
SYT6	CUX1	TDRD10
FAM19A5	ELMO3	TEPP
HS6ST3	NFIX	TFAP2A
RADIL	SHC4	TGFB2
MT1E	DUSP1	THBD
ALX1	MTMR12	TLL1
SALL2	TMEM61	TMEM106A
ABCB1	VWCE	TMEM108
BEGAIN	FNIP1	TMEM121
KIAA1543	MSLN	TMEM132D
CTNNA2	SLC4A4	TMEM178
TMEFF2	TMEM63C	TMEM196
CXCL1	AHNAK	TMEM200B
CPVL	TRIM31	TMEM229A
SEMA3E	RUSC1	TMEM233
RNF175	LRRC24	TMEM90A
ACP5	LPPR2	TNNC2
CALCB	PLD3	TOX
SSTR1	DENND1C	TRAM1L1
THY1	LDHC	TRANK1
PRTFDC1	WDR52	TRIM9
FAM172A	PNLIPRP1	TTBK1
LOC642597	C10orf47	TTC28
KCNMA1	SNTB1	TWIST1
SLC34A2	PRSS8	TYMP
BEST4	SS18L2	UBXN10
CPEB1	ICMT	UCN
PROM1	IGFALS	USP44
VASP	COX6A2	VAT1L
KCNE3	CAMK2B	VIM
TBX18	DLGAP3	VIPR2
PDX1	TMEM184A	VWC2
TMEM132E	TNR	VWDE
MPV17L	ZNF606	WDR17
SLC10A4	BTNL2	WFDC2
MFAP2	NXN	WNK2
ADAMTS2	BAIAP3	WSCD2
FOXL2	PCDHA12	XKR6
B4GALNT1	GFI1	ZFP28
DLX3	KCP	ZFPM2
PLXNA4	EGFR	ZIC4
TMEM132C	DIRAS3	ZNF132
GABRB1	ATP2A3	ZNF141
ALDH1L1	LMO3	ZNF229
LMO2	UPP1	ZNF256
VEGFC	APBB1IP	ZNF334
DNAJC6	EPHB4	ZNF43
PYGL	MDFIC	ZNF501
UCHL1	RARG	ZNF506
FOXC2	TINAGL1	ZNF521
DLG2	ALPK1	ZNF530
C2orf89	NNAT	ZNF542
LPAR3	GEFT	ZNF569
ZNF331	DNMT3A	ZNF583
HRH1	LRRC2	ZNF660
NPY5R	HYMAI	ZNF662
GREM1	CRYAB	ZNF665
TMTC1	EBF1	ZNF695
ADCY2	PER2	ZNF701
TNIP3	CNGA3	ZNF737
SDR42E1	GDF15	ZNF788
NKX6-2	EHBP1L1	ZNF793
CLDN10	RASIP1	ZNF804B
C2CD4B	DIRC3	ZNF85
NKX2-8	UCN3	ZNF880
PNMAL1	CCDC36	ZSCAN18
MPZ	MXRA7
LHX5	AQP11
CCNJL	F3
GPER	C1orf210
SH2D3A	C10orf41
NCAM1	GPRC5C
ANKS1B	ZNRF3
C4orf39	TMEM88B
TSHZ3	MAGI1
SLC6A1	MLXIPL
SLIT2	HYAL2
COX6B2	KCNAB3
GDA	MXRA8
CRISPLD1	CNTFR
RAB11FIP4	C9orf172
DFNB31	C9orf171
ASCL2	TCEAL7
OXGR1	SUCLG2
LOC441177	RUSC2
EML1	SREBF1
BASP1	CAPN1
SLFN11	PKDCC
C7orf52	GPSM1
FBLL1	DISP1
SLIT3	HOXA5
ZP3	NFIC
PDE1C	EIF2AK2
OGDHL	ZNF837
MEF2C	OLFM1
OTP	PRDM16
WDR86	SLC25A25
RIPPLY2	C9orf3
COL22A1	PCDHGA4
CHST9	VANGL2
ST6GAL2	DNALI1
FAM110B	GAA
KNDC1	LSP1
PCDH8	MSX1
GALNTL1	LDHAL6A
RHCG	PEG3
NPY2R	TTC22
PRMT8	NKX2-5
VSTM2A	LOC728392
PLA2R1	H19
LRP1B	LOC387646
GPX7	CDKL1
PARVB	BCAN
GRID2	KLC4
HOXA11	CORO1B
NOTCH3	LRP5
EYA4	B3GALT2
KCNH4	TTC38
PNMA2	ME1
SYN2	CPA1
SFMBT2	NDRG1
NRG3	MST1P9
EFHA2	PLEKHG6
RUNX2	PIK3R6
SPEF1	OPRL1
ICAM5	FAM50B
DPYSL5	PNPLA1
PHYHIPL	AXIN2
HIST1H3E	CBX2
CSMD2	IGLON5
TBC1D1	CYTH1
BCL6B	C22orf45
ZNF329	HRNBP3
CNIH3	DLGAP2
CNNM1	FGFR2
FMNL1	SBNO2
KIAA1751	SIM1
COL18A1	LMTK3
SEZ6	HRH3
CELSR3	DDAH2
HOXA13	ADAT3
CARD11	C8orf84
DOK6	SRM
SOX21	CD74
ZSCAN12	SLC22A16
PITX3	MYOF
	SATB2
	ITGBL1
	PTPRF
	SLCO5A1
	C5orf33
	EFCAB4B
	CD9
	SYNJ2
	EXPH5
	TSPYL5
	SLC29A1
	SNRPN
	MPP3
	SLC9A3
	AMIGO3
	DMRTA2
	PPP2R3A
	C6orf147
	MEIS1
	BCL11A
	VSIG2
	SLC6A18
	ARHGAP10
	EBF4
	FLJ32063
	GNA11
	TMEM177
	GSTM5
	ACTL6B
	GALNT9
	MRGPRE
	GPR123
	C1QTNF7
	TULP1
	PLA2G3
	LOC541473
	PART1
	KCNC1
	KLK9
	AMMECR1L
	SLC25A22
	NRXN2
	ZBTB20
	FBXL16
	ANKRD2
	TPD52L1
	CLDN19

## Sheet: TableS7_GSEA_∆Meth_Hypo
Table S7. GSEA identified pathways of genes uniquely identified by ∆Meth in the hypomethylation direction
Gene Set Name	# Genes in Gene Set (K)	Description	# Genes in Overlap (k)	k/K	p-value	FDR q-value
MANNO_MIDBRAIN_NEUROTYPES_HGABA	1106	Cell types are named using anatomical and functional mnemonics prefixed by 'm' or'h' to indicate mouse and human respectively: OMTN, oculomotor and trochlear nucleus; Sert, serotonergic; NbM, medial neuroblast; NbDA, neuroblast dopaminergic; DA0-2, dopaminergic neurons; RN, red nucleus; Gaba1-2, GABAergic neurons; mNbL1-2, lateral neuroblasts; NbML1-5, mediolateral neuroblasts; NProg, neuronal pr…	58	0.0524	2.02e-35	6.97e-31
MANNO_MIDBRAIN_NEUROTYPES_HNBGABA	703	Cell types are named using anatomical and functional mnemonics prefixed by 'm' or'h' to indicate mouse and human respectively: OMTN, oculomotor and trochlear nucleus; Sert, serotonergic; NbM, medial neuroblast; NbDA, neuroblast dopaminergic; DA0-2, dopaminergic neurons; RN, red nucleus; Gaba1-2, GABAergic neurons; mNbL1-2, lateral neuroblasts; NbML1-5, mediolateral neuroblasts; NProg, neuronal pr…	48	0.0683	1.93e-34	3.33e-30
MANNO_MIDBRAIN_NEUROTYPES_HDA1	584	Cell types are named using anatomical and functional mnemonics prefixed by 'm' or'h' to indicate mouse and human respectively: OMTN, oculomotor and trochlear nucleus; Sert, serotonergic; NbM, medial neuroblast; NbDA, neuroblast dopaminergic; DA0-2, dopaminergic neurons; RN, red nucleus; Gaba1-2, GABAergic neurons; mNbL1-2, lateral neuroblasts; NbML1-5, mediolateral neuroblasts; NProg, neuronal pr…	41	0.0702	6.34e-30	7.31e-26
GOCC_NEURON_PROJECTION	1321	A prolongation or process extending from a nerve cell, e.g. an axon or dendrite.	56	0.0424	1.89e-29	1.63e-25
MANNO_MIDBRAIN_NEUROTYPES_HDA	506	Cell types are named using anatomical and functional mnemonics prefixed by 'm' or'h' to indicate mouse and human respectively: OMTN, oculomotor and trochlear nucleus; Sert, serotonergic; NbM, medial neuroblast; NbDA, neuroblast dopaminergic; DA0-2, dopaminergic neurons; RN, red nucleus; Gaba1-2, GABAergic neurons; mNbL1-2, lateral neuroblasts; NbML1-5, mediolateral neuroblasts; NProg, neuronal pr…	34	0.0672	2.65e-24	1.83e-20
MANNO_MIDBRAIN_NEUROTYPES_HDA2	513	Cell types are named using anatomical and functional mnemonics prefixed by 'm' or'h' to indicate mouse and human respectively: OMTN, oculomotor and trochlear nucleus; Sert, serotonergic; NbM, medial neuroblast; NbDA, neuroblast dopaminergic; DA0-2, dopaminergic neurons; RN, red nucleus; Gaba1-2, GABAergic neurons; mNbL1-2, lateral neuroblasts; NbML1-5, mediolateral neuroblasts; NProg, neuronal pr…	33	0.0643	5.09e-23	2.93e-19
LIU_OVARIAN_CANCER_TUMORS_AND_XENOGRAFTS_XDGS_DN	1716	Genes differentially expressed between PDX and donor tumor samples from nine ovarian cancer patients.	53	0.0309	1.69e-21	8.32e-18
GOBP_GENERATION_OF_NEURONS	1485	The process in which nerve cells are generated. This includes the production of neuroblasts and their differentiation into neurons. [GOC:nln]	49	0.033	4.45e-21	1.92e-17
GOBP_NEUROGENESIS	1715	Generation of cells within the nervous system. [GO_REF:0000021, GOC:cls, GOC:curators, GOC:dgh, GOC:dph, GOC:jid]	52	0.0303	9.62e-21	3.69e-17
GOCC_SYNAPSE	1451	The junction between an axon of one neuron and a dendrite of another neuron, a muscle fiber or a glial cell. As the axon approaches the synapse it enlarges into a specialized structure, the presynaptic terminal bouton, which contains mitochondria and synaptic vesicles. At the tip of the terminal bouton is the presynaptic membrane; facing it, and separated from it by a minute cleft (the synaptic c…	48	0.0331	1.07e-20	3.69e-17

## Sheet: TableS8_GSEA_Rel_∆Meth_Hypo
Table S8. GSEA identified pathways of genes uniquely identified by realtive ∆Meth in the hypomethylation direction
Gene Set Name	# Genes in Gene Set (K)	Description	# Genes in Overlap (k)	k/K	p-value	FDR q-value
LIU_OVARIAN_CANCER_TUMORS_AND_XENOGRAFTS_XDGS_DN	1716	Genes differentially expressed between PDX and donor tumor samples from nine ovarian cancer patients.	92	0.0536	2.09e-41	7.22e-37
GOBP_CELL_ADHESION	1531	The attachment of a cell, either to another cell or to an underlying substrate such as the extracellular matrix, via cell adhesion molecules. [GOC:hb, GOC:pf]	86	0.0562	3.88e-40	6.71e-36
GOBP_POSITIVE_REGULATION_OF_MULTICELLULAR_ORGANISMAL_PROCESS	1684	Any process that activates or increases the frequency, rate or extent of an organismal process, any of the processes pertinent to the function of an organism above the cellular level; includes the integrated processes of tissues and organs. [GOC:ai]	78	0.0463	1.23e-30	1.41e-26
GOBP_CELL_CELL_ADHESION	962	The attachment of one cell to another cell via adhesion molecules. [GOC:dos]	59	0.0613	2.1e-29	1.81e-25
GOBP_CELL_ACTIVATION	1109	A multicellular organismal process by which exposure to an activating factor such as a cellular or soluble ligand results in a change in the morphology or behavior of a cell. [GOC:mgi_curators]	62	0.0559	1.11e-28	7.13e-25
GAO_LARGE_INTESTINE_ADULT_CI_MESENCHYMAL_CELLS	361		39	0.108	1.24e-28	7.13e-25
MODULE_84	546	Immune (humoral) and inflammatory response.	45	0.0824	7.6e-28	3.75e-24
GOBP_LYMPHOCYTE_ACTIVATION	796	A change in morphology and behavior of a lymphocyte resulting from exposure to a specific antigen, mitogen, cytokine, chemokine, cellular ligand, or soluble factor. [GOC:mgi_curators, ISBN:0781735149]	52	0.0653	3.04e-27	1.31e-23
MODULE_45	581	Whole blood genes.	45	0.0775	1.03e-26	3.96e-23
BUSSLINGER_GASTRIC_IMMUNE_CELLS	1492		66	0.0442	8.88e-25	3.07e-21

## Sheet: TableS9_GSEA_Both_Hypo
Table S9. GSEA identified pathways of genes uniquely identified by both ∆Meth and realtive ∆Meth in the hypomethylation direction
Gene Set Name	# Genes in Gene Set (K)	Description	# Genes in Overlap (k)	k/K	p-value	FDR q-value
MANNO_MIDBRAIN_NEUROTYPES_HGABA	1106	Cell types are named using anatomical and functional mnemonics prefixed by 'm' or'h' to indicate mouse and human respectively: OMTN, oculomotor and trochlear nucleus; Sert, serotonergic; NbM, medial neuroblast; NbDA, neuroblast dopaminergic; DA0-2, dopaminergic neurons; RN, red nucleus; Gaba1-2, GABAergic neurons; mNbL1-2, lateral neuroblasts; NbML1-5, mediolateral neuroblasts; NProg, neuronal pr…	73	0.066	9.01e-58	3.11e-53
MANNO_MIDBRAIN_NEUROTYPES_HNBGABA	703	Cell types are named using anatomical and functional mnemonics prefixed by 'm' or'h' to indicate mouse and human respectively: OMTN, oculomotor and trochlear nucleus; Sert, serotonergic; NbM, medial neuroblast; NbDA, neuroblast dopaminergic; DA0-2, dopaminergic neurons; RN, red nucleus; Gaba1-2, GABAergic neurons; mNbL1-2, lateral neuroblasts; NbML1-5, mediolateral neuroblasts; NProg, neuronal pr…	58	0.0825	6.59e-51	1.14e-46
MANNO_MIDBRAIN_NEUROTYPES_HDA1	584	Cell types are named using anatomical and functional mnemonics prefixed by 'm' or'h' to indicate mouse and human respectively: OMTN, oculomotor and trochlear nucleus; Sert, serotonergic; NbM, medial neuroblast; NbDA, neuroblast dopaminergic; DA0-2, dopaminergic neurons; RN, red nucleus; Gaba1-2, GABAergic neurons; mNbL1-2, lateral neuroblasts; NbML1-5, mediolateral neuroblasts; NProg, neuronal pr…	46	0.0788	2.85e-39	3.28e-35
MANNO_MIDBRAIN_NEUROTYPES_HDA	506	Cell types are named using anatomical and functional mnemonics prefixed by 'm' or'h' to indicate mouse and human respectively: OMTN, oculomotor and trochlear nucleus; Sert, serotonergic; NbM, medial neuroblast; NbDA, neuroblast dopaminergic; DA0-2, dopaminergic neurons; RN, red nucleus; Gaba1-2, GABAergic neurons; mNbL1-2, lateral neuroblasts; NbML1-5, mediolateral neuroblasts; NProg, neuronal pr…	38	0.0751	1.13e-31	9.73e-28
MANNO_MIDBRAIN_NEUROTYPES_HDA2	513	Cell types are named using anatomical and functional mnemonics prefixed by 'm' or'h' to indicate mouse and human respectively: OMTN, oculomotor and trochlear nucleus; Sert, serotonergic; NbM, medial neuroblast; NbDA, neuroblast dopaminergic; DA0-2, dopaminergic neurons; RN, red nucleus; Gaba1-2, GABAergic neurons; mNbL1-2, lateral neuroblasts; NbML1-5, mediolateral neuroblasts; NProg, neuronal pr…	38	0.0741	1.88e-31	1.3e-27
MANNO_MIDBRAIN_NEUROTYPES_HSERT	450	Cell types are named using anatomical and functional mnemonics prefixed by 'm' or'h' to indicate mouse and human respectively: OMTN, oculomotor and trochlear nucleus; Sert, serotonergic; NbM, medial neuroblast; NbDA, neuroblast dopaminergic; DA0-2, dopaminergic neurons; RN, red nucleus; Gaba1-2, GABAergic neurons; mNbL1-2, lateral neuroblasts; NbML1-5, mediolateral neuroblasts; NProg, neuronal pr…	35	0.0778	9.93e-30	5.66e-26
AACTTT_UNKNOWN	1927	Genes having at least one occurrence of the highly conserved motif M17 AACTTT in the regions spanning 4 kb centered on their transcription starting sites [-2kb,+2kb]. The motif does not match any known transcription factor binding site.	61	0.0317	1.15e-29	5.66e-26
LIU_OVARIAN_CANCER_TUMORS_AND_XENOGRAFTS_XDGS_DN	1716	Genes differentially expressed between PDX and donor tumor samples from nine ovarian cancer patients.	56	0.0326	8.45e-28	3.65e-24
GOCC_SYNAPSE	1451	The junction between an axon of one neuron and a dendrite of another neuron, a muscle fiber or a glial cell. As the axon approaches the synapse it enlarges into a specialized structure, the presynaptic terminal bouton, which contains mitochondria and synaptic vesicles. At the tip of the terminal bouton is the presynaptic membrane; facing it, and separated from it by a minute cleft (the synaptic c…	52	0.0358	1.19e-27	4.57e-24
MIR6867_5P	884	Genes predicted to be targets of miRBase v22 microRNA hsa-miR-6867-5p in miRDB v6.0 with MirTarget v4 prediction scores > 80 (high confidence targets).	42	0.0475	5.26e-27	1.82e-23

## Sheet: TableS10_GSEA_∆Meth_Hyper
Table S10. GSEA identified pathways of genes uniquely identified by ∆Meth in the hypermethylation direction
Gene Set Name	# Genes in Gene Set (K)	Description	# Genes in Overlap (k)	k/K	p-value	FDR q-value
BENPORATH_SUZ12_TARGETS	1035	Set 'Suz12 targets': genes identified by ChIP on chip as targets of the Polycomb protein SUZ12 [GeneID=23512] in human embryonic stem cells.	97	0.0937	1.16e-66	4e-62
BENPORATH_ES_WITH_H3K27ME3	1115	Set 'H3K27 bound': genes posessing the trimethylated H3K27 (H3K27me3) mark in their promoters in human embryonic stem cells, as identified by ChIP on chip.	99	0.0888	7.4e-66	1.28e-61
BENPORATH_EED_TARGETS	1059	Set 'Eed targets': genes identified by ChIP on chip as targets of the Polycomb protein EED [GeneID=8726] in human embryonic stem cells.	83	0.0784	1.55e-50	1.78e-46
MANNO_MIDBRAIN_NEUROTYPES_HGABA	1106	Cell types are named using anatomical and functional mnemonics prefixed by 'm' or'h' to indicate mouse and human respectively: OMTN, oculomotor and trochlear nucleus; Sert, serotonergic; NbM, medial neuroblast; NbDA, neuroblast dopaminergic; DA0-2, dopaminergic neurons; RN, red nucleus; Gaba1-2, GABAergic neurons; mNbL1-2, lateral neuroblasts; NbML1-5, mediolateral neuroblasts; NProg, neuronal pr…	76	0.0687	4.03e-42	3.48e-38
BENPORATH_PRC2_TARGETS	650	Set 'PRC2 targets': Polycomb Repression Complex 2 (PRC) targets; identified by ChIP on chip on human embryonic stem cells as genes that: posess the trimethylated H3K27 mark in their promoters and are bound by SUZ12 [GeneID=23512] and EED [GeneID=8726] Polycomb proteins.	60	0.0923	2.14e-40	1.48e-36
GOBP_NEUROGENESIS	1715	Generation of cells within the nervous system. [GO_REF:0000021, GOC:cls, GOC:curators, GOC:dgh, GOC:dph, GOC:jid]	88	0.0513	6.15e-39	3.54e-35
GOBP_GENERATION_OF_NEURONS	1485	The process in which nerve cells are generated. This includes the production of neuroblasts and their differentiation into neurons. [GOC:nln]	81	0.0545	1.27e-37	6.26e-34
MANNO_MIDBRAIN_NEUROTYPES_HDA1	584	Cell types are named using anatomical and functional mnemonics prefixed by 'm' or'h' to indicate mouse and human respectively: OMTN, oculomotor and trochlear nucleus; Sert, serotonergic; NbM, medial neuroblast; NbDA, neuroblast dopaminergic; DA0-2, dopaminergic neurons; RN, red nucleus; Gaba1-2, GABAergic neurons; mNbL1-2, lateral neuroblasts; NbML1-5, mediolateral neuroblasts; NProg, neuronal pr…	55	0.0942	1.68e-37	7.27e-34
MEISSNER_BRAIN_HCP_WITH_H3K4ME3_AND_H3K27ME3	1074	Genes with high-CpG-density promoters (HCP) bearing histone H3 dimethylation at K4 (H3K4me2) and trimethylation at K27 (H3K27me3) in brain.	70	0.0652	2.88e-37	1.11e-33
MANNO_MIDBRAIN_NEUROTYPES_HDA2	513	Cell types are named using anatomical and functional mnemonics prefixed by 'm' or'h' to indicate mouse and human respectively: OMTN, oculomotor and trochlear nucleus; Sert, serotonergic; NbM, medial neuroblast; NbDA, neuroblast dopaminergic; DA0-2, dopaminergic neurons; RN, red nucleus; Gaba1-2, GABAergic neurons; mNbL1-2, lateral neuroblasts; NbML1-5, mediolateral neuroblasts; NProg, neuronal pr…	51	0.0994	5.9e-36	2.04e-32

[truncated: 2 more sheets: TableS11_GSEA_Rel_∆Meth_Hyper, TableS12_GSEA_Both_Hyper]
